# Supplementary material for: Proteome Changes Driven by Phosphorus Deficiency and Recovery in the Brown Tide-Forming Alga Aureococcus anophagefferens
Source: PLoS One. 2011 Dec 14;6(12):e28949. doi: 10.1371/journal.pone.0028949 (PMC3237563; doi:10.1371/journal.pone.0028949)
Supplement: Table S1 — Peptides. Peptide identifications. (XLSX) [file pone.0028949.s004.xlsx]

## Sheet: Sheet1
Table S1) Peptides. Peptide identifications.
12,481 total peptide identifications, 3,431 unique, 0.6 % peptide false discovery rate
Fragment Tolerance: 1.00 Da (Monoisotopic)						Digestion Enzyme: Trypsin
Parent Tolerance: 2.0 Da (Monoisotopic)						Max Missed Cleavages: 2
Fixed Modifications: +57 on C (Carbamidomethyl)						Peptide Thresholds: 95.0% minimum
Variable Modifications: +16 on M (Oxidation)						Protein Thresholds: 99.0% minimum and 2 peptides minimum
Biological sample category	Protein name	Protein molecular weight (Da)	Protein identification probability	Number of unique peptides	Number of unique spectra	Number of total spectra	Percentage of total spectra	Percentage sequence coverage	Peptide sequence	Previous amino acid	Next amino acid	Best Peptide identification probability	Best SEQUEST XCorr score	Best SEQUEST DCn score	Number of identified +1H spectra	Number of identified +2H spectra	Number of identified +3H spectra	Number of identified +4H spectra	Number of enzymatic termini	Calculated +1H Peptide Mass (AMU)	Other Proteins
Replete	jgi|Auran1|6356	22395.3	0.998	2	2	4	0.0002	0.146	DLAICNSPNQDNPLMK	K	G	0.95	4.5	0.564	0	2	0	0	2	1829.85
Replete	jgi|Auran1|6356	22395.3	0.998	2	2	4	0.0002	0.146	LDEKDQPPIAELMK	K	D	0.95	4.09	0.493	0	0	2	0	2	1642.84
Replete	jgi|Auran1|59955	22006.8	0.998	2	2	3	0.0001	0.167	ALTCELQNGR	R	A	0.95	3.57	0.303	0	5	0	0	2	1161.57	jgi|Auran1|15689
Replete	jgi|Auran1|59955	22006.8	0.998	2	2	3	0.0001	0.167	DSIGVDPGPIEPSGLFWEDK	K	E	0.95	3.68	0.586	0	1	0	0	2	2158.03
Replete	jgi|Auran1|59955	22006.8	0.998	2	2	3	0.0001	0.167	DSIGVDPGPIEPSGLFWEDKESLAR	K	R	0.95	2.86	0.441	0	0	2	0	2	2714.33
Replete	jgi|Auran1|70049	36983.9	1	6	7	8	0.0003	0.211	AIIVFVPFGLLK	K	S	0.95	3.28	0.523	0	1	0	0	2	1316.83
Replete	jgi|Auran1|70049	36983.9	1	6	7	8	0.0003	0.211	ELYFLSAK	K	E	0.95	1.96	0.321	0	1	0	0	2	970.525
Replete	jgi|Auran1|70049	36983.9	1	6	7	8	0.0003	0.211	EVIFEFPVTDL	K	-	0.95	2.73	0.419	0	1	0	0	2	1308.67
Replete	jgi|Auran1|70049	36983.9	1	6	7	8	0.0003	0.211	HVIIVAQR	R	T	0.95	2	0.237	0	1	0	0	2	935.579
Replete	jgi|Auran1|70049	36983.9	1	6	7	8	0.0003	0.211	LDTFSFVYK	K	K	0.95	2.5	0.394	0	1	0	0	2	1119.57
Replete	jgi|Auran1|70049	36983.9	1	6	7	8	0.0003	0.211	TLTSVQDCILDDLVYPTEIVGK	R	R	0.95	4.83	0.548	0	2	1	0	2	2479.26
Replete	jgi|Auran1|59252	34420.7	1	5	5	6	0.0002	0.206	AFGADLVLTPAAK	K	G	0.95	4.39	0.529	0	2	0	0	2	1273.72
Replete	jgi|Auran1|59252	34420.7	1	5	5	6	0.0002	0.206	EEGIFCGISSGAAVLAAK	K	I	0.95	4.52	0.548	0	1	0	0	2	1779.9
Replete	jgi|Auran1|59252	34420.7	1	5	5	6	0.0002	0.206	GYLLQQFNNPDNPK	K	V	0.95	4.48	0.527	0	1	0	0	2	1647.81
Replete	jgi|Auran1|59252	34420.7	1	5	5	6	0.0002	0.206	IGLSMIAEAEK	R	R	0.95	2.3	0.289	0	1	0	0	2	1177.61
Replete	jgi|Auran1|59252	34420.7	1	5	5	6	0.0002	0.206	IVVIIPSFGER	R	Y	0.95	2.69	0.422	0	1	0	0	2	1229.73
Replete	jgi|Auran1|72077	209304	0.998	2	2	2	0.0001	0.0151	FINVQNLVLDPDAK	R	L	0.95	2.74	0.281	0	1	0	0	2	1585.86
Replete	jgi|Auran1|72077	209304	0.998	2	2	2	0.0001	0.0151	LVAEYGAAVEDLEPK	K	A	0.95	2.63	0.279	0	1	0	0	2	1603.82
Replete	jgi|Auran1|24439	63441.2	0.998	2	2	2	0.0001	0.0828	VVVPVGGVLSTPAASALVR	R	R	0.95	2.23	0.408	0	1	0	0	2	1792.07
Replete	jgi|Auran1|24439	63441.2	0.998	2	2	2	0.0001	0.0828	VYVEKPLPEPSEADLDLVAADALGDLADAGK	R	K	0.95	3.45	0.423	0	0	1	0	2	3181.62
Replete	jgi|Auran1|59236	50445.7	1	13	16	28	0.0011	0.433	AFNDVLTGDYDDLPEAAFYMVGGIDDVIEK	K	A	0.95	5.73	0.539	0	0	2	0	2	3308.52
Replete	jgi|Auran1|59236	50445.7	1	13	16	28	0.0011	0.433	APPTFVEQGK	R	T	0.95	3.04	0.505	0	2	0	0	2	1073.56
Replete	jgi|Auran1|59236	50445.7	1	13	16	28	0.0011	0.433	DIASLGIYPAVDPLDSSSR	R	M	0.95	5.46	0.609	0	1	0	0	2	1976
Replete	jgi|Auran1|59236	50445.7	1	13	16	28	0.0011	0.433	GQEFVDCGAPITIPVGPECLGR	R	I	0.95	3.62	0.438	0	1	1	0	2	2372.14
Replete	jgi|Auran1|59236	50445.7	1	13	16	28	0.0011	0.433	IGLFGGAGVGK	K	T	0.95	3.53	0.382	1	4	0	0	2	975.563
Replete	jgi|Auran1|59236	50445.7	1	13	16	28	0.0011	0.433	IPSAVGYQPTLATDMGGLQER	R	I	0.95	5.4	0.714	0	2	0	0	2	2220.1
Replete	jgi|Auran1|59236	50445.7	1	13	16	28	0.0011	0.433	IVNVIGEAVDDAGPVK	R	T	0.95	4.48	0.599	0	2	0	0	2	1595.86
Replete	jgi|Auran1|59236	50445.7	1	13	16	28	0.0011	0.433	LPPILNALETTMNGER	K	L	0.95	4.58	0.654	0	2	0	0	2	1784.92
Replete	jgi|Auran1|59236	50445.7	1	13	16	28	0.0011	0.433	LVLEVAQHLGENTVR	R	T	0.95	3.75	0.444	0	1	2	0	2	1677.93
Replete	jgi|Auran1|59236	50445.7	1	13	16	28	0.0011	0.433	TIAMDATEGLVR	R	G	0.95	4.01	0.54	0	3	0	0	2	1276.66
Replete	jgi|Auran1|59236	50445.7	1	13	16	28	0.0011	0.433	TQEILTTGIK	K	V	0.95	2.75	0.471	0	1	0	0	2	1103.63
Replete	jgi|Auran1|59236	50445.7	1	13	16	28	0.0011	0.433	VALTGLTIAEYFR	R	D	0.95	2.07	0.346	0	1	0	0	2	1453.81
Replete	jgi|Auran1|59236	50445.7	1	13	16	28	0.0011	0.433	VVDLLAPYAK	K	G	0.95	2.79	0.483	0	2	0	0	2	1088.64
Replete	jgi|Auran1|59217	18041	1	3	3	4	0.0002	0.268	DYGINAVCTHLGCVVPWNK	R	A	0.95	2.72	0.272	0	0	1	0	2	2203.04
Replete	jgi|Auran1|59217	18041	1	3	3	4	0.0002	0.268	GDATYLIVDEDK	K	T	0.95	3.5	0.417	0	1	0	0	2	1338.64
Replete	jgi|Auran1|59217	18041	1	3	3	4	0.0002	0.268	GGGGGGGGLPALTK	R	A	0.95	3.3	0.474	0	2	0	0	2	1098.59
Replete	jgi|Auran1|59202	31024.8	1	3	3	3	0.0001	0.194	SFGLLSGAFLGDPEEIK	R	A	0.95	2.97	0.38	0	1	0	0	2	1779.92
Replete	jgi|Auran1|59202	31024.8	1	3	3	3	0.0001	0.194	SYSTPPPPVDLDSEYWPGNINR	R	Y	0.95	3.71	0.452	0	0	1	0	2	2504.17
Replete	jgi|Auran1|59202	31024.8	1	3	3	3	0.0001	0.194	TLPYWDAAVVPALER	R	G	0.95	3.52	0.403	0	1	0	0	2	1700.9
Replete	jgi|Auran1|60237	14526.2	0.998	2	3	4	0.0002	0.169	IIDLHSPSEIVK	R	Q	0.95	2.52	0.332	0	1	2	0	2	1350.76
Replete	jgi|Auran1|60237	14526.2	0.998	2	3	4	0.0002	0.169	NLETVCANLK	K	R	0.95	3.17	0.213	0	1	0	0	2	1161.59
Replete	jgi|Auran1|68863	42268	0.998	2	2	2	0.0001	0.0976	GDDIDGEAAGDESGR	R	S	0.95	2.65	0.428	0	1	0	0	2	1463.59
Replete	jgi|Auran1|68863	42268	0.998	2	2	2	0.0001	0.0976	VFAWDPVDETWK	R	Q	0.95	2.73	0.316	0	1	0	0	2	1492.71	jgi|Auran1|72267
Replete	jgi|Auran1|68863	42268	0.998	2	2	2	0.0001	0.0976	VFAWDPVEETWVQR	R	G	0.95	5	0.389	0	1	0	0	2	1761.86
Replete	jgi|Auran1|28095	25282.1	0.998	2	2	2	0.0001	0.138	ITPSCGFVYSGVGPDYR	K	V	0.95	3.45	0.571	0	1	0	0	2	1874.87
Replete	jgi|Auran1|28095	25282.1	0.998	2	2	2	0.0001	0.138	VLTPAEVKDYLDESN	K	-	0.95	2.91	0.472	0	1	0	0	2	1692.83
Replete	jgi|Auran1|60213	21090.6	1	3	3	3	0.0001	0.174	AFLEDVLQFK	K	Q	0.95	3.13	0.313	0	1	0	0	2	1209.65
Replete	jgi|Auran1|60213	21090.6	1	3	3	3	0.0001	0.174	GLDVDDLVVK	K	H	0.95	2.2	0.393	0	1	0	0	2	1072.59
Replete	jgi|Auran1|60213	21090.6	1	3	3	3	0.0001	0.174	YSYDADSATESSK	K	A	0.95	3.76	0.631	0	1	0	0	2	1423.59
Replete	jgi|Auran1|60208	31106.4	1	5	5	6	0.0002	0.221	IEITNPVNLLR	R	K	0.95	3.17	0.336	0	1	0	0	2	1281.75
Replete	jgi|Auran1|60208	31106.4	1	5	5	6	0.0002	0.221	MEGLLDDYSK	K	I	0.95	3.18	0.417	0	2	0	0	2	1186.53
Replete	jgi|Auran1|60208	31106.4	1	5	5	6	0.0002	0.221	VGNSEAVLLQK	R	L	0.95	3.64	0.305	0	1	0	0	2	1157.65
Replete	jgi|Auran1|60208	31106.4	1	5	5	6	0.0002	0.221	VLDLTDADLSCK	K	F	0.95	3.85	0.603	0	1	0	0	2	1349.66
Replete	jgi|Auran1|60208	31106.4	1	5	5	6	0.0002	0.221	VLGNVGFVFTNEDLADVR	K	E	0.95	3.85	0.513	0	1	0	0	2	1965.01
Replete	jgi|Auran1|60205	21053.3	1	4	4	7	0.0003	0.305	DLTLTGAIDQLYSEMAGR	R	H	0.95	5.38	0.631	0	2	0	0	2	1953.96
Replete	jgi|Auran1|60205	21053.3	1	4	4	7	0.0003	0.305	KAPTPQEPEPSVYR	R	M	0.95	3.52	0.314	0	0	1	0	2	1598.82
Replete	jgi|Auran1|60205	21053.3	1	4	4	7	0.0003	0.305	LFAPNEVLAR	K	S	0.95	3.52	0.306	0	2	0	0	2	1129.64
Replete	jgi|Auran1|60205	21053.3	1	4	4	7	0.0003	0.305	TTGEILDVNEIR	K	E	0.95	3.55	0.456	0	2	0	0	2	1359.71
Replete	jgi|Auran1|11148	44472.4	0.998	2	2	2	0.0001	0.105	EMLTDTSGDDPLALPPATADVILACLEAK	K	S	0.95	3.37	0.287	0	0	1	0	2	3043.49
Replete	jgi|Auran1|11148	44472.4	0.998	2	2	2	0.0001	0.105	SAGLTVDAALQACK	R	A	0.95	2.84	0.292	0	1	0	0	2	1404.72
Replete	jgi|Auran1|28033	23501.4	1	6	6	7	0.0003	0.446	AGFEGGQTPLYR	R	R	0.95	2.7	0.209	0	1	0	0	2	1295.64
Replete	jgi|Auran1|28033	23501.4	1	6	6	7	0.0003	0.446	ESVEEAGVDAFEFR	R	V	0.95	2.64	0.514	0	1	0	0	2	1584.72
Replete	jgi|Auran1|28033	23501.4	1	6	6	7	0.0003	0.446	GISAGQGATCGFGMR	R	G	0.95	2.8	0.541	0	1	0	0	2	1485.66
Replete	jgi|Auran1|28033	23501.4	1	6	6	7	0.0003	0.446	LGQLSTLEPNSEVDYAALMEK	K	G	0.95	5.74	0.644	0	1	0	0	2	2308.14
Replete	jgi|Auran1|28033	23501.4	1	6	6	7	0.0003	0.446	LVGRPTGPGHTNEVFSLIK	K	L	0.95	2.44	0.187	0	0	1	0	2	2022.11
Replete	jgi|Auran1|28033	23501.4	1	6	6	7	0.0003	0.446	VVGSASDDVPLPEGLTVK	K	A	0.95	4.96	0.542	0	2	0	0	2	1782.95
Replete	jgi|Auran1|31507	48498.6	1	6	6	6	0.0002	0.172	ALGFEPTLLNDK	R	L	0.95	3.07	0.218	0	1	0	0	2	1317.71
Replete	jgi|Auran1|31507	48498.6	1	6	6	6	0.0002	0.172	ALGFEPTLLNDKLFEEVQDVTNK	R	Y	0.95	3.61	0.518	0	0	1	0	2	2620.35
Replete	jgi|Auran1|31507	48498.6	1	6	6	6	0.0002	0.172	FDYDGDYGTVLNR	R	F	0.95	4.17	0.574	0	1	0	0	2	1534.68
Replete	jgi|Auran1|31507	48498.6	1	6	6	6	0.0002	0.172	QEAAENELDVSNR	R	K	0.95	2.49	0.249	0	1	0	0	2	1474.68
Replete	jgi|Auran1|31507	48498.6	1	6	6	6	0.0002	0.172	VTDLHQGIVWGTNTPLTGMDER	R	L	0.95	3.8	0.486	0	0	1	0	2	2440.19
Replete	jgi|Auran1|31507	48498.6	1	6	6	6	0.0002	0.172	VTDLHQGIVWGTNTPLTGMDERLTNR	R	F	0.95	2.32	0.206	0	0	1	0	2	2924.47
Replete	jgi|Auran1|65714	153562	0.998	2	3	3	0.0001	0.0361	NANEGILGDVELLQQITEATR	R	A	0.95	5.39	0.651	0	1	1	0	2	2284.18
Replete	jgi|Auran1|65714	153562	0.998	2	3	3	0.0001	0.0361	QVVADNELGALVDALDGTYIEPGPGGDPIR	R	N	0.95	4.24	0.308	0	0	1	0	2	3051.53
Replete	jgi|Auran1|17219	10921.8	1	3	3	3	0.0001	0.32	IQNFAGVVIK	R	R	0.95	2.78	0.298	0	1	0	0	2	1088.65
Replete	jgi|Auran1|17219	10921.8	1	3	3	3	0.0001	0.32	SGGGVTQTFTVR	R	K	0.95	3.16	0.48	0	1	0	0	2	1209.62
Replete	jgi|Auran1|17219	10921.8	1	3	3	3	0.0001	0.32	TFPLYSPTVK	R	G	0.95	1.93	0.39	0	1	0	0	2	1152.63
Replete	jgi|Auran1|20700	38602.5	1	8	8	8	0.0003	0.359	EGGLAVIEAMCEK	K	L	0.95	3.05	0.336	0	1	0	0	2	1406.67
Replete	jgi|Auran1|20700	38602.5	1	8	8	8	0.0003	0.359	GGNHVLVLCDTYEPDGTPLPTNTR	R	A	0.95	3.92	0.412	0	0	1	0	2	2626.26
Replete	jgi|Auran1|20700	38602.5	1	8	8	8	0.0003	0.359	LTGDCETASIDQFSYGVADR	R	G	0.95	5.26	0.658	0	1	0	0	2	2204.98
Replete	jgi|Auran1|20700	38602.5	1	8	8	8	0.0003	0.359	PQGPYYCGAGADR	K	A	0.95	3.59	0.441	0	1	0	0	1	1411.61
Replete	jgi|Auran1|20700	38602.5	1	8	8	8	0.0003	0.359	RLTGDCETASIDQFSYGVADR	R	G	0.95	4.48	0.488	0	0	1	0	2	2361.08
Replete	jgi|Auran1|20700	38602.5	1	8	8	8	0.0003	0.359	VQGPVDAYPK	K	W	0.95	2.18	0.233	0	1	0	0	2	1073.56
Replete	jgi|Auran1|20700	38602.5	1	8	8	8	0.0003	0.359	WNYDGSSTGQAPGDDSEVMIVPR	K	A	0.95	2.75	0.186	0	0	1	0	2	2497.09
Replete	jgi|Auran1|20700	38602.5	1	8	8	8	0.0003	0.359	YMGLDTGDDCQVEYVFLDKDQVAR	K	S	0.95	5.63	0.618	0	0	1	0	2	2853.27
Replete	jgi|Auran1|72895	41628	1	3	4	14	0.0005	0.139	HTEGLCDWSNSAVEVTGEFK	K	Y	0.95	3.07	0.38	0	0	1	0	2	2266.01
Replete	jgi|Auran1|72895	41628	1	3	4	14	0.0005	0.139	WVFGSHACMSDCALANK	K	K	0.95	4.2	0.603	0	2	6	0	2	1953.84
Replete	jgi|Auran1|72895	41628	1	3	4	14	0.0005	0.139	YEYPVDSPMEWSPYAK	K	A	0.95	4.66	0.687	0	5	0	0	2	1961.86
Replete	jgi|Auran1|52498	190330	0.998	2	2	2	0.0001	0.0193	LLFASINNNAK	K	L	0.95	2.54	0.237	0	1	0	0	2	1204.67
Replete	jgi|Auran1|52498	190330	0.998	2	2	2	0.0001	0.0193	QLAAGSLVDPNSVVEIFMAANR	K	I	0.95	2.83	0.316	0	0	1	0	2	2318.18
Replete	jgi|Auran1|53011	51307.2	1	2	2	2	0.0001	0.0533	ALEGNAEVDALR	K	E	0.95	3.32	0.454	0	1	0	0	2	1257.64
Replete	jgi|Auran1|53011	51307.2	1	2	2	2	0.0001	0.0533	PALIVCGGSAYPR	K	D	0.95	3.3	0.447	0	1	0	0	1	1360.7
Replete	jgi|Auran1|53005	30655.4	1	3	3	3	0.0001	0.124	PGTAGVYDTAVALGAAK	R	C	0.95	4.86	0.643	0	1	0	0	1	1561.82
Replete	jgi|Auran1|53005	30655.4	1	3	3	3	0.0001	0.124	STGGDTSGPRPGTAGVYDTAVALGAAK	R	C	0.95	5.28	0.566	0	0	1	0	2	2477.23
Replete	jgi|Auran1|53005	30655.4	1	3	3	3	0.0001	0.124	VAQTFGAAFAK	K	G	0.95	2.87	0.339	0	1	0	0	2	1110.59
Replete	jgi|Auran1|24362	40859.8	1	3	3	3	0.0001	0.0969	AYEPTECVFDPR	K	G	0.95	2.23	0.323	0	1	0	0	2	1483.65
Replete	jgi|Auran1|24362	40859.8	1	3	3	3	0.0001	0.0969	IGVLGGGQLGR	R	M	0.95	2.39	0.207	0	1	0	0	2	1026.61
Replete	jgi|Auran1|24362	40859.8	1	3	3	3	0.0001	0.0969	VTLDLPLGSVAPVR	R	D	0.95	3.28	0.498	0	1	0	0	2	1436.85
Replete	jgi|Auran1|24359	53281.5	1	4	4	6	0.0002	0.138	AGAPLTLTTDYDYK	K	S	0.95	4.3	0.538	0	2	0	0	2	1528.75
Replete	jgi|Auran1|24359	53281.5	1	4	4	6	0.0002	0.138	FFYAGAALSAPR	R	L	0.95	2.86	0.335	0	1	0	0	2	1270.66
Replete	jgi|Auran1|24359	53281.5	1	4	4	6	0.0002	0.138	GASGATVVESTVAAATQAAR	R	D	0.95	3.35	0.524	0	1	0	0	2	1817.94
Replete	jgi|Auran1|24359	53281.5	1	4	4	6	0.0002	0.138	IENQEGLANFEGIVAATDAVMVAR	K	G	0.95	6	0.555	0	0	2	0	2	2518.26
Replete	jgi|Auran1|6122	18599.8	1	7	8	12	0.0005	0.563	ALDSGLLLVSGPFSVNGVPIK	K	R	0.95	4.12	0.579	0	2	0	0	2	2083.18
Replete	jgi|Auran1|6122	18599.8	1	7	8	12	0.0005	0.563	ASLQPGAVLILLAGR	R	F	0.95	4.48	0.482	0	2	0	0	2	1478.91
Replete	jgi|Auran1|6122	18599.8	1	7	8	12	0.0005	0.563	DAEGDFFAADAAAPAPELSDER	K	K	0.95	5.27	0.678	0	1	1	0	2	2265
Replete	jgi|Auran1|6122	18599.8	1	7	8	12	0.0005	0.563	DQATLDAALVK	K	A	0.95	2.59	0.338	0	1	0	0	2	1144.62
Replete	jgi|Auran1|6122	18599.8	1	7	8	12	0.0005	0.563	FYPAYDVVAK	R	K	0.95	2.38	0.398	0	2	0	0	2	1172.6
Replete	jgi|Auran1|6122	18599.8	1	7	8	12	0.0005	0.563	LNDAYFK	K	R	0.95	2.43	0.0959	0	1	0	0	2	870.436
Replete	jgi|Auran1|6122	18599.8	1	7	8	12	0.0005	0.563	VNPAYVIATSTK	R	V	0.95	2.51	0.543	0	2	0	0	2	1263.69
Replete	jgi|Auran1|70385	47911.9	1	3	3	4	0.0002	0.0998	ILDKEEPSEFVGDVWK	K	K	0.95	3.53	0.393	0	0	1	0	2	1890.95
Replete	jgi|Auran1|70385	47911.9	1	3	3	4	0.0002	0.0998	TPQGAIFESNAIAR	K	Y	0.95	4.31	0.519	0	2	0	0	2	1474.77
Replete	jgi|Auran1|70385	47911.9	1	3	3	4	0.0002	0.0998	TPSFLAMSPMGK	K	V	0.95	2.95	0.48	0	1	0	0	2	1298.61
Replete	jgi|Auran1|60177	25498.5	1	6	6	9	0.0003	0.294	EEAPMPVANFEEGMGK	K	A	0.95	2.75	0.435	0	1	0	0	2	1751.76
Replete	jgi|Auran1|60177	25498.5	1	6	6	9	0.0003	0.294	ELAEDGYAGVEVR	R	V	0.95	4.13	0.507	0	2	0	0	2	1407.68
Replete	jgi|Auran1|60177	25498.5	1	6	6	9	0.0003	0.294	FHFQDGAVELYAER	R	V	0.95	2.77	0.31	0	1	0	0	2	1681.8
Replete	jgi|Auran1|60177	25498.5	1	6	6	9	0.0003	0.294	GLCAQAQAESLK	R	Y	0.95	3.37	0.45	0	1	0	0	2	1275.64
Replete	jgi|Auran1|60177	25498.5	1	6	6	9	0.0003	0.294	NTLADVVTILEPK	K	E	0.95	3.43	0.267	0	2	0	0	2	1412.8
Replete	jgi|Auran1|60177	25498.5	1	6	6	9	0.0003	0.294	NTLADVVTILEPKEEAPMPVANFEEGMGK	K	A	0.95	5.36	0.481	0	0	2	0	2	3161.54
Replete	jgi|Auran1|60167	22047.5	0.998	2	2	2	0.0001	0.154	GPYQTNLLLGGFDK	K	G	0.95	3.82	0.477	0	1	0	0	2	1522.79
Replete	jgi|Auran1|60167	22047.5	0.998	2	2	2	0.0001	0.154	GVGASLYYIDYMASSNK	K	V	0.95	2.48	0.459	0	1	0	0	2	1854.86
Replete	jgi|Auran1|70352	36557.1	1	7	7	7	0.0003	0.328	AGIALTDNFVK	K	L	0.95	2.81	0.307	0	1	0	0	2	1148.63
Replete	jgi|Auran1|70352	36557.1	1	7	7	7	0.0003	0.328	GACYNIIPSGTGAAK	R	A	0.95	4.28	0.551	0	1	0	0	2	1479.73
Replete	jgi|Auran1|70352	36557.1	1	7	7	7	0.0003	0.328	GTVEAAEDAIIVDGEK	K	I	0.95	4.46	0.542	0	1	0	0	2	1616.8
Replete	jgi|Auran1|70352	36557.1	1	7	7	7	0.0003	0.328	LQAGASYDDIK	K	A	0.95	3.56	0.426	0	1	0	0	2	1180.59
Replete	jgi|Auran1|70352	36557.1	1	7	7	7	0.0003	0.328	LVSWYDNECGYSNK	K	V	0.95	4	0.56	0	1	0	0	2	1734.74
Replete	jgi|Auran1|70352	36557.1	1	7	7	7	0.0003	0.328	VINDTYGIEEGLMTTVHSVTATQQTVDGPSQK	K	D	0.95	4.02	0.406	0	0	1	0	2	3435.66
Replete	jgi|Auran1|70352	36557.1	1	7	7	7	0.0003	0.328	VPTANVSVVDLTCK	R	L	0.95	4.55	0.581	0	1	0	0	2	1502.79
Replete	jgi|Auran1|32040	35872	1	5	5	5	0.0002	0.24	AADEIIDEGHFLGK	R	A	0.95	3.45	0.348	0	1	0	0	2	1514.75
Replete	jgi|Auran1|32040	35872	1	5	5	5	0.0002	0.24	AALVYAADPAAVANGDAVTVLTYLHGVR	K	E	0.95	2.64	0.283	0	0	1	0	2	2798.48
Replete	jgi|Auran1|32040	35872	1	5	5	5	0.0002	0.24	ICTAASPDAAYGLCK	K	A	0.95	4.62	0.532	0	1	0	0	2	1597.74
Replete	jgi|Auran1|32040	35872	1	5	5	5	0.0002	0.24	LTQQTFGALR	K	A	0.95	2.75	0.326	0	1	0	0	2	1134.63
Replete	jgi|Auran1|32040	35872	1	5	5	5	0.0002	0.24	VSEELYDELDAPVKR	R	L	0.95	3.3	0.387	0	0	1	0	2	1762.89
Replete	jgi|Auran1|23768	23916.3	1	7	7	9	0.0003	0.406	AMAQIQELYGK	K	M	0.95	3.52	0.536	0	1	0	0	2	1251.64
Replete	jgi|Auran1|23768	23916.3	1	7	7	9	0.0003	0.406	IQDKEGIPPDQQR	K	L	0.95	2.33	0.332	0	1	0	0	2	1523.78
Replete	jgi|Auran1|23768	23916.3	1	7	7	9	0.0003	0.406	LVAELLEACATIEK	K	A	0.95	2.75	0.432	0	1	0	0	2	1559.84
Replete	jgi|Auran1|23768	23916.3	1	7	7	9	0.0003	0.406	MSEGPLVLNQITR	K	W	0.95	3.92	0.505	0	2	0	0	2	1457.78
Replete	jgi|Auran1|23768	23916.3	1	7	7	9	0.0003	0.406	QNVDPSFSAGLK	K	H	0.95	2.52	0.367	0	1	0	0	2	1262.64
Replete	jgi|Auran1|23768	23916.3	1	7	7	9	0.0003	0.406	TITLDVEPSDTIDNVK	K	Q	0.95	4.73	0.554	0	2	0	0	2	1759.9
Replete	jgi|Auran1|23768	23916.3	1	7	7	9	0.0003	0.406	TLSDYNIQK	R	E	0.95	2.08	0.283	0	1	0	0	2	1081.55
Replete	jgi|Auran1|28333	31243.8	1	3	3	3	0.0001	0.186	DCTMQGAELVVR	R	C	0.95	3.66	0.399	0	1	0	0	2	1378.65
Replete	jgi|Auran1|28333	31243.8	1	3	3	3	0.0001	0.186	DTIGVAACPVPGVPAPPK	R	-	0.95	3.89	0.459	0	1	0	0	2	1745.93
Replete	jgi|Auran1|28333	31243.8	1	3	3	3	0.0001	0.186	TLGECGEEPNGMQYAQLSVSAIR	R	D	0.95	3.29	0.261	0	0	1	0	2	2510.17
Replete	jgi|Auran1|58864	22287.7	0.998	2	2	3	0.0001	0.116	LQCFEGVPPPYDK	R	M	0.95	3.12	0.244	0	1	0	0	2	1549.74
Replete	jgi|Auran1|58864	22287.7	0.998	2	2	3	0.0001	0.116	VADVLEAFGH	K	-	0.95	3.93	0.346	0	2	0	0	2	1057.53
Replete	jgi|Auran1|66270	41327.3	1	3	3	4	0.0002	0.142	DIMPDKELEDVVAAR	R	A	0.95	2.55	0.237	0	1	0	0	2	1700.85
Replete	jgi|Auran1|66270	41327.3	1	3	3	4	0.0002	0.142	LTDVVEPWFLGGGADGPGGAEFAAFK	K	R	0.95	4.7	0.6	0	1	0	0	2	2608.27
Replete	jgi|Auran1|66270	41327.3	1	3	3	4	0.0002	0.142	VGPSSGNEFTDFSR	R	I	0.95	3.75	0.557	0	2	0	0	2	1499.68
Replete	jgi|Auran1|21695	44281.9	0.998	2	3	3	0.0001	0.118	AFGGDTPYSIMFGPDLCGYDISR	K	V	0.95	5.16	0.604	0	1	1	0	2	2555.12
Replete	jgi|Auran1|21695	44281.9	0.998	2	3	3	0.0001	0.118	KLNEPEEDDEDDAADDEDEEHDEL	K	-	0.95	6.8	0.594	0	0	1	0	2	2816.07
Replete	jgi|Auran1|54007	26906.9	1	3	5	12	0.0005	0.147	SPEAADALEGAGVDK	R	E	0.95	4.69	0.555	0	2	0	0	2	1429.68
Replete	jgi|Auran1|54007	26906.9	1	3	5	12	0.0005	0.147	SPEAADALEGAGVDKEK	R	T	0.95	5.36	0.614	0	3	5	0	2	1686.82
Replete	jgi|Auran1|54007	26906.9	1	3	5	12	0.0005	0.147	VTTSLFMTGLSASDVNEDADVR	K	A	0.95	6.22	0.694	0	1	1	0	2	2344.1
Replete	jgi|Auran1|37568	19310.6	1	4	4	8	0.0003	0.242	DPLTGSSFDVK	R	T	0.95	3.09	0.471	0	2	0	0	2	1165.57
Replete	jgi|Auran1|37568	19310.6	1	4	4	8	0.0003	0.242	SPVLGTPMAAGSVANGLIR	K	D	0.95	3.71	0.615	0	4	0	0	2	1826.98
Replete	jgi|Auran1|37568	19310.6	1	4	4	8	0.0003	0.242	SPVLGTPMAAGSVANGLIRDPLTGSSFDVK	K	T	0.95	5.04	0.601	0	0	1	0	2	2973.54
Replete	jgi|Auran1|37568	19310.6	1	4	4	8	0.0003	0.242	TGGGAVSVEVDVNAK	K	T	0.95	2.06	0.405	0	1	0	0	2	1402.72
Replete	jgi|Auran1|27339	52049	1	6	6	7	0.0003	0.262	AQLGECNVESYISEFAPLEYALSETR	K	S	0.95	3.91	0.277	0	0	1	0	2	2976.39
Replete	jgi|Auran1|27339	52049	1	6	6	7	0.0003	0.262	EAGITYLNR	R	L	0.95	2.87	0.373	0	1	0	0	2	1036.54
Replete	jgi|Auran1|27339	52049	1	6	6	7	0.0003	0.262	LGCPGGEHAIDSDDLFSLPK	K	A	0.95	3.45	0.494	0	0	2	0	2	2128
Replete	jgi|Auran1|27339	52049	1	6	6	7	0.0003	0.262	VAVLDFVKPSPAGSTWGLGGTCVNVGCIPK	K	K	0.95	5.32	0.572	0	0	1	0	2	3086.58
Replete	jgi|Auran1|27339	52049	1	6	6	7	0.0003	0.262	VVGFHYLGPNAGEITQGFSIAMR	K	K	0.95	3.93	0.518	0	0	1	0	2	2480.24
Replete	jgi|Auran1|27339	52049	1	6	6	7	0.0003	0.262	YADTAALGIDNVPGASANVNAK	R	T	0.95	6.25	0.623	0	1	0	0	2	2132.06
Replete	jgi|Auran1|37524	239720	0.998	2	2	2	0.0001	0.0203	AAAAGATLETAFDVLDLEDDVRDK	R	I	0.95	2.68	0.318	0	0	1	0	2	2506.23
Replete	jgi|Auran1|37524	239720	0.998	2	2	2	0.0001	0.0203	IPALLEVVSNAAEFGDLAAR	K	H	0.95	3.64	0.237	0	0	1	0	2	2056.11
Replete	jgi|Auran1|27306	35828.5	1	10	11	17	0.0006	0.435	AEAGIEFFEWLNQEEPVSA	K	-	0.95	4.33	0.596	0	1	0	0	2	2166
Replete	jgi|Auran1|27306	35828.5	1	10	11	17	0.0006	0.435	AFLAALDGNCK	R	T	0.95	3.13	0.393	0	1	0	0	2	1179.58
Replete	jgi|Auran1|27306	35828.5	1	10	11	17	0.0006	0.435	DGSVIGSASLR	K	R	0.95	3.11	0.289	0	1	0	0	2	1061.56
Replete	jgi|Auran1|27306	35828.5	1	10	11	17	0.0006	0.435	EDTRDVFISPTAK	R	S	0.95	2.31	0.249	0	1	0	0	2	1478.75
Replete	jgi|Auran1|27306	35828.5	1	10	11	17	0.0006	0.435	GSPLALAQAYMTR	R	E	0.95	3.85	0.531	0	2	0	0	2	1378.72
Replete	jgi|Auran1|27306	35828.5	1	10	11	17	0.0006	0.435	IVDGELLFDGLVSSLDGQQMYR	R	A	0.95	6.59	0.535	0	2	3	0	2	2471.21
Replete	jgi|Auran1|27306	35828.5	1	10	11	17	0.0006	0.435	LDEGVVDATLLAYAGLK	K	R	0.95	4.71	0.601	0	2	0	0	2	1747.95
Replete	jgi|Auran1|27306	35828.5	1	10	11	17	0.0006	0.435	QSQILAINPTLK	R	C	0.95	3.67	0.355	0	2	0	0	2	1325.78
Replete	jgi|Auran1|27306	35828.5	1	10	11	17	0.0006	0.435	TQGDMILDK	K	A	0.95	2.51	0.319	0	1	0	0	2	1020.5
Replete	jgi|Auran1|27306	35828.5	1	10	11	17	0.0006	0.435	YIAALNHEETFTCVSCER	K	A	0.95	3.43	0.615	0	0	1	0	2	2199.98
Replete	jgi|Auran1|36612	44925.1	1	6	6	6	0.0002	0.245	ADVLCGPGNAWVTAAK	R	A	0.95	4.53	0.52	0	1	0	0	2	1629.81
Replete	jgi|Auran1|36612	44925.1	1	6	6	6	0.0002	0.245	ASFVDMETPIPGGVAGHTVSPVEVAGCYAPGGR	K	Y	0.95	2.89	0.421	0	0	1	0	2	3285.57
Replete	jgi|Auran1|36612	44925.1	1	6	6	6	0.0002	0.245	INAALDAQLENLPTK	K	A	0.95	3.82	0.474	0	1	0	0	2	1610.88
Replete	jgi|Auran1|36612	44925.1	1	6	6	6	0.0002	0.245	IVEASSVNAGDSETLDTK	K	V	0.95	5.81	0.635	0	1	0	0	2	1835.89
Replete	jgi|Auran1|36612	44925.1	1	6	6	6	0.0002	0.245	VMEFAEQCLAK	K	V	0.95	3.27	0.379	0	1	0	0	2	1325.62
Replete	jgi|Auran1|36612	44925.1	1	6	6	6	0.0002	0.245	YPLPSSVLMTAVTAR	R	A	0.95	3.01	0.258	0	1	0	0	2	1605.87
Replete	jgi|Auran1|63510	94794.5	1	9	9	9	0.0003	0.168	ALDTTAADTYR	K	Y	0.95	3.37	0.341	0	1	0	0	2	1197.58
Replete	jgi|Auran1|63510	94794.5	1	9	9	9	0.0003	0.168	ASFLAALVSGEATSPIVDKYEAMR	K	I	0.95	3.41	0.25	0	0	1	0	2	2542.29
Replete	jgi|Auran1|63510	94794.5	1	9	9	9	0.0003	0.168	DLVHAIPYAAIQR	R	G	0.95	2.77	0.262	0	1	0	0	2	1466.81
Replete	jgi|Auran1|63510	94794.5	1	9	9	9	0.0003	0.168	EPIVEYLESNVVMLK	K	W	0.95	2.45	0.218	0	1	0	0	2	1778.93
Replete	jgi|Auran1|63510	94794.5	1	9	9	9	0.0003	0.168	FPVGISFPAGSGLVAFAAATGVMPLDMPESVK	R	V	0.95	3.18	0.249	0	0	1	0	2	3195.61
Replete	jgi|Auran1|63510	94794.5	1	9	9	9	0.0003	0.168	GFPLAYVGDVVGTGSSR	K	K	0.95	2.93	0.513	0	1	0	0	2	1681.86
Replete	jgi|Auran1|63510	94794.5	1	9	9	9	0.0003	0.168	LLDNFEGQLPTR	K	L	0.95	3.2	0.369	0	1	0	0	2	1402.73
Replete	jgi|Auran1|63510	94794.5	1	9	9	9	0.0003	0.168	LPTPEEYFDTVK	K	A	0.95	2.06	0.251	0	1	0	0	2	1438.71
Replete	jgi|Auran1|63510	94794.5	1	9	9	9	0.0003	0.168	VADAATVVSTSTR	R	N	0.95	3.24	0.6	0	1	0	0	2	1277.67
Replete	jgi|Auran1|59068	53958.3	0.998	2	2	2	0.0001	0.0568	AEAGDAMDEEPAVEK	K	K	0.95	2.75	0.44	0	1	0	0	2	1577.66
Replete	jgi|Auran1|59068	53958.3	0.998	2	2	2	0.0001	0.0568	ASFLAACEESSAK	R	V	0.95	2.1	0.322	0	1	0	0	2	1370.63
Replete	jgi|Auran1|62551	236566	0.998	2	2	2	0.0001	0.0153	FKMAAKLVSQLTPK	R	S	0.95	2.62	0.221	0	1	0	0	2	1561.91
Replete	jgi|Auran1|62551	236566	0.998	2	2	2	0.0001	0.0153	SVYPIRERLSGFDGFYGFLK	K	N	0.95	2.51	0.217	0	0	1	0	2	2351.22
Replete	jgi|Auran1|72743	181364	0.998	2	2	2	0.0001	0.0174	SDTDGEQSVADIAGDVAK	R	A	0.95	5.18	0.531	0	1	0	0	2	1777.81
Replete	jgi|Auran1|72743	181364	0.998	2	2	2	0.0001	0.0174	WFDEILPMIDAK	R	Q	0.95	3.3	0.179	0	1	0	0	2	1493.74
Replete	jgi|Auran1|60089	18488	1	3	4	10	0.0004	0.172	FMAMEVGDLNTK	K	I	0.95	3.56	0.579	0	4	0	0	2	1355.63
Replete	jgi|Auran1|60089	18488	1	3	4	10	0.0004	0.172	YGDPADLQSYEGGR	K	D	0.95	4.56	0.59	0	2	0	0	2	1527.67
Replete	jgi|Auran1|60089	18488	1	3	4	10	0.0004	0.172	YGDPADLQSYEGGRDEK	K	A	0.95	3.06	0.491	0	1	3	0	2	1899.84
Replete	jgi|Auran1|59049	12233	0.998	2	2	2	0.0001	0.183	LITPSALVER	K	L	0.95	2.3	0.182	0	1	0	0	2	1098.65
Replete	jgi|Auran1|59049	12233	0.998	2	2	2	0.0001	0.183	VLFDEDTYAR	K	L	0.95	2.37	0.48	0	1	0	0	2	1228.59
Replete	jgi|Auran1|52346	36563	0.998	2	2	2	0.0001	0.0885	LDVDEDIGAVVVGFDR	K	E	0.95	4.29	0.559	0	1	0	0	2	1718.86
Replete	jgi|Auran1|52346	36563	0.998	2	2	2	0.0001	0.0885	VIPDFYVDSIADYL	K	-	0.95	3.27	0.624	0	1	0	0	2	1629.81
Replete	jgi|Auran1|60076	41060.7	1	9	11	14	0.0005	0.356	FCVWTSGAFAK	R	L	0.95	2.96	0.516	0	1	0	0	2	1273.6
Replete	jgi|Auran1|60076	41060.7	1	9	11	14	0.0005	0.356	GHVVDAVPEMPLVVDGSVEGSVAK	R	T	0.95	5.53	0.531	0	0	2	0	2	2407.22
Replete	jgi|Auran1|60076	41060.7	1	9	11	14	0.0005	0.356	GPLVIYEDKDAELPR	K	A	0.95	4.57	0.524	0	0	1	0	2	1714.9
Replete	jgi|Auran1|60076	41060.7	1	9	11	14	0.0005	0.356	KGPLVIYEDKDAELPR	R	A	0.95	4.71	0.537	0	0	1	0	2	1843
Replete	jgi|Auran1|60076	41060.7	1	9	11	14	0.0005	0.356	LINSDEIQSVVRPAEK	R	D	0.95	4.5	0.488	0	1	2	0	2	1797.97
Replete	jgi|Auran1|60076	41060.7	1	9	11	14	0.0005	0.356	LNLLLLAPGGHVGR	R	F	0.95	4.12	0.377	0	1	1	0	2	1429.86
Replete	jgi|Auran1|60076	41060.7	1	9	11	14	0.0005	0.356	NLPGVDLCHIDR	R	L	0.95	3.16	0.455	0	1	0	0	2	1408.7
Replete	jgi|Auran1|60076	41060.7	1	9	11	14	0.0005	0.356	PCMLNADLAR	R	L	0.95	3.03	0.461	0	2	0	0	1	1176.55
Replete	jgi|Auran1|60076	41060.7	1	9	11	14	0.0005	0.356	PVVSVYSPEGAVASTTPLPAVFNAPIRPDLVR	R	F	0.95	3.45	0.428	0	0	1	0	1	3319.81
Replete	jgi|Auran1|60075	24249.4	1	3	4	7	0.0003	0.19	INWIVNPTHK	R	H	0.95	2.49	0.421	0	2	0	0	2	1221.67
Replete	jgi|Auran1|60075	24249.4	1	3	4	7	0.0003	0.19	VLNSYWVNQDATYK	R	Y	0.95	4.86	0.656	0	2	0	0	2	1700.83
Replete	jgi|Auran1|60075	24249.4	1	3	4	7	0.0003	0.19	YYEVIAVDPSHAVIR	K	N	0.95	4.34	0.476	0	1	2	0	2	1731.91
Replete	jgi|Auran1|60062	10397.7	0.998	2	2	3	0.0001	0.277	VIAGGAYMLNTPPAVTAK	K	T	0.95	4.32	0.589	0	2	0	0	2	1789.95
Replete	jgi|Auran1|60062	10397.7	0.998	2	2	3	0.0001	0.277	YNCVFCGK	K	D	0.95	2.31	0.511	0	1	0	0	2	1047.44
Replete	jgi|Auran1|72700	76273.1	1	5	5	5	0.0002	0.107	ELVSNAADACDK	R	K	0.95	3.28	0.524	0	1	0	0	2	1292.58
Replete	jgi|Auran1|72700	76273.1	1	5	5	5	0.0002	0.107	GIVDSEDLPLNVGR	R	E	0.95	3.44	0.364	0	1	0	0	2	1483.78
Replete	jgi|Auran1|72700	76273.1	1	5	5	5	0.0002	0.107	SGDGYTTLAEYVER	K	M	0.95	3.54	0.551	0	1	0	0	2	1560.72
Replete	jgi|Auran1|72700	76273.1	1	5	5	5	0.0002	0.107	VGVVEESGDVQK	K	D	0.95	4.01	0.554	0	1	0	0	2	1245.63
Replete	jgi|Auran1|72700	76273.1	1	5	5	5	0.0002	0.107	VTALMGGVTIPPKQDEPEEEPK	K	D	0.95	3.07	0.157	0	0	1	0	2	2381.19
Replete	jgi|Auran1|52316	37264.8	1	9	11	14	0.0005	0.406	CILDVGIQTTTTGNR	K	V	0.95	5.09	0.514	0	1	0	0	2	1648.83
Replete	jgi|Auran1|52316	37264.8	1	9	11	14	0.0005	0.406	EDPSPAEKEEFEVEDR	R	E	0.95	2.44	0.36	0	1	2	0	2	1905.84
Replete	jgi|Auran1|52316	37264.8	1	9	11	14	0.0005	0.406	EGVEPDGMEDLYTSVHEAIR	K	E	0.95	2.85	0.335	0	0	1	0	2	2263.02
Replete	jgi|Auran1|52316	37264.8	1	9	11	14	0.0005	0.406	GATDGGLDIPHNYK	K	R	0.95	4.24	0.512	0	1	0	0	2	1457.7
Replete	jgi|Auran1|52316	37264.8	1	9	11	14	0.0005	0.406	NFAAAYCTGLLVAR	K	R	0.95	4.39	0.44	0	1	0	0	2	1526.78
Replete	jgi|Auran1|52316	37264.8	1	9	11	14	0.0005	0.406	VGLDELYEGNTDPEGEVVK	K	T	0.95	5.95	0.642	0	2	0	0	2	2062.98
Replete	jgi|Auran1|52316	37264.8	1	9	11	14	0.0005	0.406	YQQLFADYIK	K	E	0.95	3.6	0.526	0	2	0	0	2	1288.66
Replete	jgi|Auran1|52316	37264.8	1	9	11	14	0.0005	0.406	YVTCAVHSSELVGDK	K	C	0.95	4.63	0.552	0	1	1	0	2	1664.8
Replete	jgi|Auran1|52316	37264.8	1	9	11	14	0.0005	0.406	YVTCAVHSSELVGDKCIATATSK	K	E	0.95	2.92	0.373	0	0	1	0	2	2497.21
Replete	jgi|Auran1|59020	42288.1	1	8	9	11	0.0004	0.268	AEYDESGPAIVHR	K	K	0.95	3.23	0.497	0	1	1	0	2	1443.69
Replete	jgi|Auran1|59020	42288.1	1	8	9	11	0.0004	0.268	AGFAGDDAPR	K	A	0.95	3	0.245	0	1	0	0	2	976.449
Replete	jgi|Auran1|59020	42288.1	1	8	9	11	0.0004	0.268	CPEVLFQPSFIGK	R	E	0.95	3.97	0.431	0	2	0	0	2	1521.78
Replete	jgi|Auran1|59020	42288.1	1	8	9	11	0.0004	0.268	DLYCNIVLSGGTTMFPGVGER	K	M	0.95	5.7	0.627	0	1	0	0	2	2302.09
Replete	jgi|Auran1|59020	42288.1	1	8	9	11	0.0004	0.268	GYSFTTTAER	R	E	0.95	3.37	0.524	0	1	0	0	2	1132.53
Replete	jgi|Auran1|59020	42288.1	1	8	9	11	0.0004	0.268	KDLYCNIVLSGGTTMFPGVGER	R	M	0.95	3.42	0.389	0	0	1	0	2	2430.18
Replete	jgi|Auran1|59020	42288.1	1	8	9	11	0.0004	0.268	SYELPDGNVIVIGNER	K	F	0.95	4.66	0.585	0	2	0	0	2	1774.9
Replete	jgi|Auran1|59020	42288.1	1	8	9	11	0.0004	0.268	VAPEEHPVLLTEAPLNPK	R	A	0.95	3.61	0.308	0	0	1	0	2	1954.07
Replete	jgi|Auran1|68630	86188.8	1	3	4	5	0.0002	0.0442	YATMSAADVDK	K	A	0.95	2.62	0.521	0	2	0	0	2	1171.53
Replete	jgi|Auran1|68630	86188.8	1	3	4	5	0.0002	0.0442	YFAWEDAIDLSK	R	Y	0.95	3.89	0.624	0	1	0	0	2	1457.7
Replete	jgi|Auran1|68630	86188.8	1	3	4	5	0.0002	0.0442	YNVTAAYCHFGR	K	E	0.95	3.55	0.522	0	1	1	0	2	1458.66
Replete	jgi|Auran1|4875	24724.9	1	5	5	7	0.0003	0.37	EASYVNLPVIAFCDSDSPCQHVDVAIPSNNK	K	G	0.95	4.96	0.539	0	0	1	0	2	3446.6
Replete	jgi|Auran1|4875	24724.9	1	5	5	7	0.0003	0.37	FAQYTGAASIAGR	K	F	0.95	3.37	0.484	0	2	0	0	2	1312.67
Replete	jgi|Auran1|4875	24724.9	1	5	5	7	0.0003	0.37	FTPGTFTNQITK	R	Q	0.95	1.97	0.47	0	2	0	0	2	1354.7
Replete	jgi|Auran1|4875	24724.9	1	5	5	7	0.0003	0.37	ILVITDPR	R	T	0.95	2.72	0.275	0	1	0	0	2	926.568
Replete	jgi|Auran1|4875	24724.9	1	5	5	7	0.0003	0.37	VLTAIENPQDIIAISAR	R	P	0.95	2.04	0.295	0	1	0	0	1	1824.02
Replete	jgi|Auran1|23619	127763	1	3	3	3	0.0001	0.0347	LGETFNQSALPLR	K	Y	0.95	2.43	0.184	0	1	0	0	2	1445.78
Replete	jgi|Auran1|23619	127763	1	3	3	3	0.0001	0.0347	LGVAAGLANGVLQR	R	A	0.95	2.74	0.373	0	1	0	0	2	1338.79
Replete	jgi|Auran1|23619	127763	1	3	3	3	0.0001	0.0347	VDVGGAPGLLALSSR	R	A	0.95	2.82	0.173	0	1	0	0	2	1411.79
Replete	jgi|Auran1|4844	25005.3	1	3	3	3	0.0001	0.186	ELDDIADVEAK	K	C	0.95	2.76	0.237	0	1	0	0	2	1217.59
Replete	jgi|Auran1|4844	25005.3	1	3	3	3	0.0001	0.186	TPDDKPINAFGFDEECLPK	K	A	0.95	5.23	0.455	0	0	1	0	2	2193.02
Replete	jgi|Auran1|4844	25005.3	1	3	3	3	0.0001	0.186	VVAIAESDPLAK	K	E	0.95	3.56	0.412	0	1	0	0	2	1212.68
Replete	jgi|Auran1|17075	15905.1	0.998	2	2	4	0.0002	0.15	VVAYEPGESAVGIK	K	Q	0.95	3.12	0.39	0	2	0	0	2	1418.75
Replete	jgi|Auran1|17075	15905.1	0.998	2	2	4	0.0002	0.15	YPFALVDK	R	V	0.95	2.39	0.233	0	2	0	0	2	952.514
Replete	jgi|Auran1|65557	175390	0.998	2	2	2	0.0001	0.0177	AADLLSTDAAPAAK	R	A	0.95	2.52	0.252	0	1	0	0	2	1314.69
Replete	jgi|Auran1|65557	175390	0.998	2	2	2	0.0001	0.0177	ADAASGPAAAPAVAAK	K	P	0.95	3.16	0.45	0	1	0	0	1	1338.7
Replete	jgi|Auran1|53446	73148	1	2	2	2	0.0001	0.0533	AAIGPFATPDLLIPVAGLPK	R	T	0.95	4.29	0.493	0	1	0	0	2	1961.15
Replete	jgi|Auran1|53446	73148	1	2	2	2	0.0001	0.0533	QGGFEVGDQAWFVGGR	R	L	0.95	2.18	0.284	0	1	0	0	2	1709.8
Replete	jgi|Auran1|9008	9576.6	1	3	3	4	0.0002	0.54	MNAMSEEYTDAIFYK	K	V	0.95	3.96	0.301	0	1	0	0	2	1812.78
Replete	jgi|Auran1|9008	9576.6	1	3	3	4	0.0002	0.54	VDVVNGANIEAVTSNVQK	K	-	0.95	4.89	0.549	0	1	0	0	2	1856.97
Replete	jgi|Auran1|9008	9576.6	1	3	3	4	0.0002	0.54	VIGDSSAEASSLMK	K	R	0.95	4.23	0.606	0	2	0	0	2	1410.68
Replete	jgi|Auran1|30589	23553.6	1	6	8	10	0.0004	0.378	CDGYILEGPELAFYK	R	R	0.95	5.2	0.571	0	1	0	0	2	1774.84
Replete	jgi|Auran1|30589	23553.6	1	6	8	10	0.0004	0.378	ILDVVYNSTNNELVR	R	T	0.95	5.3	0.539	0	2	1	0	2	1748.92
Replete	jgi|Auran1|30589	23553.6	1	6	8	10	0.0004	0.378	LESGNYSWGSEVCTR	R	K	0.95	4.9	0.587	0	1	0	0	2	1744.76
Replete	jgi|Auran1|30589	23553.6	1	6	8	10	0.0004	0.378	LLAVVSSR	R	P	0.95	2.52	0.261	0	1	0	0	1	844.526
Replete	jgi|Auran1|30589	23553.6	1	6	8	10	0.0004	0.378	NTIVQVDATPFR	K	Q	0.95	2.92	0.507	0	1	0	0	2	1360.72
Replete	jgi|Auran1|30589	23553.6	1	6	8	10	0.0004	0.378	SLESTLDDQFASGR	R	L	0.95	4.82	0.635	0	2	1	0	2	1525.71
Replete	jgi|Auran1|65524	228237	1	19	19	20	0.0008	0.16	ALDALDMVMLDSR	K	V	0.95	2.46	0.316	0	1	0	0	2	1481.7
Replete	jgi|Auran1|65524	228237	1	19	19	20	0.0008	0.16	AMDGYDALQGSSAEAAVGVFVDALR	K	A	0.95	5.35	0.513	0	0	1	0	2	2529.19
Replete	jgi|Auran1|65524	228237	1	19	19	20	0.0008	0.16	AMVASGGAATLADAAATVEATVR	K	A	0.95	2.64	0.457	0	1	0	0	2	2104.07
Replete	jgi|Auran1|65524	228237	1	19	19	20	0.0008	0.16	ANNIDTSWLDGILAAK	K	S	0.95	5.16	0.608	0	1	0	0	2	1701.88
Replete	jgi|Auran1|65524	228237	1	19	19	20	0.0008	0.16	AYEETFTLSYVSGR	R	S	0.95	2.53	0.4	0	1	0	0	2	1622.77
Replete	jgi|Auran1|65524	228237	1	19	19	20	0.0008	0.16	EAVKPQAGQVWYPDSAHK	R	T	0.95	3.55	0.312	0	0	1	0	2	2011
Replete	jgi|Auran1|65524	228237	1	19	19	20	0.0008	0.16	ELTGADLEIPDISSIVEAK	K	E	0.95	5.27	0.63	0	1	0	0	2	2000.04
Replete	jgi|Auran1|65524	228237	1	19	19	20	0.0008	0.16	GLEYLYVSEADLK	K	S	0.95	3.78	0.373	0	1	0	0	2	1499.76
Replete	jgi|Auran1|65524	228237	1	19	19	20	0.0008	0.16	IFEEGPPTKPSGGIAQPDIFADMELK	K	A	0.95	4.71	0.498	0	0	1	0	2	2803.39
Replete	jgi|Auran1|65524	228237	1	19	19	20	0.0008	0.16	IFINVIPEVVKDDGSPMDVAR	R	L	0.95	3.51	0.337	0	0	1	0	2	2314.21
Replete	jgi|Auran1|65524	228237	1	19	19	20	0.0008	0.16	LAAQSVFVR	K	R	0.95	3.14	0.322	0	1	0	0	2	990.574
Replete	jgi|Auran1|65524	228237	1	19	19	20	0.0008	0.16	LNALDGDAANAALK	K	L	0.95	3.53	0.38	0	1	0	0	2	1356.71
Replete	jgi|Auran1|65524	228237	1	19	19	20	0.0008	0.16	LVLFDDADAACGGMPGVLDSYTADLK	K	E	0.95	2.51	0.384	0	0	1	0	2	2714.27
Replete	jgi|Auran1|65524	228237	1	19	19	20	0.0008	0.16	QVVGELLASR	K	A	0.95	2.76	0.231	0	1	0	0	2	1071.62
Replete	jgi|Auran1|65524	228237	1	19	19	20	0.0008	0.16	SVGIGAYLNR	R	L	0.95	2.7	0.285	0	1	0	0	2	1049.57
Replete	jgi|Auran1|65524	228237	1	19	19	20	0.0008	0.16	TDPVTGVATAYCDLDGSSCVVDPYPAADAVGK	K	K	0.95	4.92	0.622	0	0	1	0	2	3271.48
Replete	jgi|Auran1|65524	228237	1	19	19	20	0.0008	0.16	TVEAVVPADPANPDSR	R	E	0.95	3.8	0.589	0	1	0	0	2	1637.81
Replete	jgi|Auran1|65524	228237	1	19	19	20	0.0008	0.16	VPSIPWSGSYGNPGDDGPLQAR	K	L	0.95	2.88	0.319	0	0	1	0	2	2270.08
Replete	jgi|Auran1|65524	228237	1	19	19	20	0.0008	0.16	YFTFVNPACSGGAPGAFK	R	E	0.95	3.92	0.561	0	2	0	0	2	1890.89
Replete	jgi|Auran1|26683	25819.5	1	3	3	5	0.0002	0.246	GGLPGYFPPIEGR	K	I	0.95	3.36	0.505	0	3	0	0	2	1359.71
Replete	jgi|Auran1|26683	25819.5	1	3	3	5	0.0002	0.246	GYVAGVTPQEQWDNIPLIGK	R	L	0.95	4.62	0.681	0	1	0	0	2	2185.13
Replete	jgi|Auran1|26683	25819.5	1	3	3	5	0.0002	0.246	IGPFPIGNLNLYKPFDIFPEQSEDEK	R	A	0.95	3.42	0.392	0	0	1	0	2	3007.51
Replete	jgi|Auran1|65502	128141	1	3	3	3	0.0001	0.0367	AAYADANELLGDIVK	K	V	0.95	2.9	0.349	0	1	0	0	2	1562.81
Replete	jgi|Auran1|65502	128141	1	3	3	3	0.0001	0.0367	AFVEGGDDPVGYPVIVK	R	A	0.95	4.59	0.604	0	1	0	0	2	1761.91
Replete	jgi|Auran1|65502	128141	1	3	3	3	0.0001	0.0367	VFDSLNYVENLR	R	L	0.95	3.69	0.446	0	1	0	0	2	1468.74
Replete	jgi|Auran1|26663	12250.6	0.998	2	2	3	0.0001	0.202	DASAYETYALPK	R	I	0.95	3.68	0.489	0	2	0	0	2	1328.64
Replete	jgi|Auran1|26663	12250.6	0.998	2	2	3	0.0001	0.202	NIVDASSMR	R	D	0.95	2.19	0.22	0	1	0	0	2	992.484
Replete	jgi|Auran1|64968	190576	0.998	2	2	2	0.0001	0.0253	AADAAQQAALDAVDEVK	K	R	0.95	5.1	0.616	0	1	0	0	2	1685.83
Replete	jgi|Auran1|64968	190576	0.998	2	2	2	0.0001	0.0253	STVGEAGSATLDAAGAAAEATAAAAAAEVK	R	A	0.95	4.68	0.534	0	0	1	0	2	2603.28
Replete	jgi|Auran1|38489	17008	0.998	2	2	5	0.0002	0.185	GLTPSQIGVILR	K	D	0.95	2.37	0.332	0	2	0	0	2	1253.76
Replete	jgi|Auran1|38489	17008	0.998	2	2	5	0.0002	0.185	NGLAPEIPEDLYMLIK	K	K	0.95	3.63	0.575	0	3	0	0	2	1831.95
Replete	jgi|Auran1|7898	15884	1	4	4	6	0.0002	0.264	GFSLAELK	R	A	0.95	2.63	0.275	0	1	0	0	2	864.483
Replete	jgi|Auran1|7898	15884	1	4	4	6	0.0002	0.264	SAESLAANVAR	K	L	0.95	3.89	0.354	0	2	0	0	2	1088.57
Replete	jgi|Auran1|7898	15884	1	4	4	6	0.0002	0.264	TIGISVDSR	K	R	0.95	1.99	0.227	0	1	0	0	2	947.516
Replete	jgi|Auran1|7898	15884	1	4	4	6	0.0002	0.264	VITWFDQPAK	K	K	0.95	2.93	0.479	0	2	0	0	2	1204.64
Replete	jgi|Auran1|27934	25105.6	1	3	3	4	0.0002	0.149	DANADAVLVALR	K	R	0.95	2.95	0.206	0	1	0	0	2	1227.67
Replete	jgi|Auran1|27934	25105.6	1	3	3	4	0.0002	0.149	VSIGQAVLSVR	R	A	0.95	3.8	0.286	0	2	0	0	2	1128.67
Replete	jgi|Auran1|27934	25105.6	1	3	3	4	0.0002	0.149	WLVAAGSSVK	K	Y	0.95	2.81	0.218	0	1	0	0	2	1017.57
Replete	jgi|Auran1|52275	73241	1	2	2	2	0.0001	0.0466	HAVVTVPAYFNDAQR	K	Q	0.95	2.97	0.383	0	0	1	0	2	1687.86
Replete	jgi|Auran1|52275	73241	1	2	2	2	0.0001	0.0466	KAFSPEEVSAMILGKMK	R	D	0.95	2.68	0.213	0	0	1	0	2	1881.98
Replete	jgi|Auran1|24154	20027.2	1	3	4	7	0.0003	0.124	FPGYLSK	K	H	0.95	1.67	0.208	1	1	0	0	2	811.436
Replete	jgi|Auran1|24154	20027.2	1	3	4	7	0.0003	0.124	VAMAAFVGYLVPEVYK	R	F	0.95	4.71	0.694	0	4	0	0	2	1772.93
Replete	jgi|Auran1|24154	20027.2	1	3	4	7	0.0003	0.124	VAMAAFVGYLVPEVYKFPGYLSK	R	H	0.95	3.76	0.329	0	0	1	0	2	2549.35
Replete	jgi|Auran1|24147	42771	1	6	6	7	0.0003	0.206	LESYKPDRPLPK	R	I	0.95	1.9	0.357	0	0	1	0	2	1442.8
Replete	jgi|Auran1|24147	42771	1	6	6	7	0.0003	0.206	LSDVTEFNAAYGELPDLAATR	K	K	0.95	5	0.677	0	1	0	0	2	2253.1
Replete	jgi|Auran1|24147	42771	1	6	6	7	0.0003	0.206	RPGWSPAVYGSAPVGR	K	S	0.95	2.86	0.216	0	0	1	0	2	1656.86
Replete	jgi|Auran1|24147	42771	1	6	6	7	0.0003	0.206	SVLGVPDDYR	R	I	0.95	2.88	0.275	0	1	0	0	2	1120.56
Replete	jgi|Auran1|24147	42771	1	6	6	7	0.0003	0.206	TWFGDVTNQLK	K	L	0.95	3.23	0.39	0	1	0	0	2	1308.66
Replete	jgi|Auran1|24147	42771	1	6	6	7	0.0003	0.206	VPDLDWIADDR	R	T	0.95	3.37	0.533	0	2	0	0	2	1314.63
Replete	jgi|Auran1|52245	34457.1	1	10	12	23	0.0009	0.5	DGDFEVETTTLGAAEPK	K	E	0.95	3.52	0.625	0	2	0	0	2	1779.83
Replete	jgi|Auran1|52245	34457.1	1	10	12	23	0.0009	0.5	ELEAQGIEVEIVPVGTK	K	V	0.95	3.87	0.572	0	2	0	0	2	1810.98
Replete	jgi|Auran1|52245	34457.1	1	10	12	23	0.0009	0.5	ELEAQGIEVEIVPVGTKVEGYFRR	K	R	0.95	2.65	0.366	0	0	1	0	2	2718.45
Replete	jgi|Auran1|52245	34457.1	1	10	12	23	0.0009	0.5	EPLDLPLLENR	R	E	0.95	2.37	0.371	0	2	0	0	2	1308.72
Replete	jgi|Auran1|52245	34457.1	1	10	12	23	0.0009	0.5	FVSLIASSPSIR	K	T	0.95	2.78	0.36	0	2	0	0	2	1276.73
Replete	jgi|Auran1|52245	34457.1	1	10	12	23	0.0009	0.5	GLCGSYNTYIIK	R	K	0.95	3.85	0.461	0	1	0	0	2	1388.69
Replete	jgi|Auran1|52245	34457.1	1	10	12	23	0.0009	0.5	QAGVTQEILEIVAGATAAQG	R	-	0.95	4.03	0.466	0	2	2	0	2	1927.01
Replete	jgi|Auran1|52245	34457.1	1	10	12	23	0.0009	0.5	RGEEFPASYSCPQVPSADFASEVSR	R	E	0.95	4.58	0.581	0	0	2	0	2	2773.25
Replete	jgi|Auran1|52245	34457.1	1	10	12	23	0.0009	0.5	SLQESVASELASR	R	M	0.95	3.78	0.486	0	1	0	0	2	1376.7
Replete	jgi|Auran1|52245	34457.1	1	10	12	23	0.0009	0.5	TILPLSATGIETEGDEIFEMSTK	R	D	0.95	5.89	0.643	0	3	3	0	2	2482.23
Replete	jgi|Auran1|70163	28864.2	1	3	4	5	0.0002	0.24	DMTVLGDTCSIGCTK	R	E	0.95	2.73	0.409	0	1	0	0	2	1657.72
Replete	jgi|Auran1|70163	28864.2	1	3	4	5	0.0002	0.24	LMDIDAESLGIPDQEYNTTIK	K	M	0.95	5.53	0.672	0	1	2	0	2	2382.14
Replete	jgi|Auran1|70163	28864.2	1	3	4	5	0.0002	0.24	SNASVDKEDEAVEIQMEEPVELNFALR	R	Y	0.95	3.72	0.476	0	0	1	0	2	3078.46
Replete	jgi|Auran1|72618	93270.6	1	18	18	26	0.001	0.29	AFCQFIMSPICK	R	M	0.95	3.12	0.504	0	1	0	0	2	1517.7
Replete	jgi|Auran1|72618	93270.6	1	18	18	26	0.001	0.29	AMADEYGWDVTDAR	R	K	0.95	4.73	0.586	0	2	0	0	2	1615.67
Replete	jgi|Auran1|72618	93270.6	1	18	18	26	0.001	0.29	CSVLCDEQMR	K	S	0.95	3.39	0.35	0	1	0	0	2	1313.53
Replete	jgi|Auran1|72618	93270.6	1	18	18	26	0.001	0.29	ESVGATSAQTCLSK	R	S	0.95	4.34	0.52	0	1	0	0	2	1438.68
Replete	jgi|Auran1|72618	93270.6	1	18	18	26	0.001	0.29	ESVVAGFQWASK	R	C	0.95	2.94	0.512	0	1	0	0	2	1308.66
Replete	jgi|Auran1|72618	93270.6	1	18	18	26	0.001	0.29	FQEQVQDIPAGNTCGLVGVDQYLLK	R	S	0.95	3.01	0.346	0	0	1	0	2	2792.39
Replete	jgi|Auran1|72618	93270.6	1	18	18	26	0.001	0.29	GVNYLAEIR	K	E	0.95	3.21	0.149	0	1	0	0	2	1034.56
Replete	jgi|Auran1|72618	93270.6	1	18	18	26	0.001	0.29	IWGFGPDGSGANLIYDQTK	K	G	0.95	5.28	0.644	0	1	0	0	2	2038.99
Replete	jgi|Auran1|72618	93270.6	1	18	18	26	0.001	0.29	KEDEELVGKPLLK	K	R	0.95	3.18	0.258	0	0	2	0	2	1497.85
Replete	jgi|Auran1|72618	93270.6	1	18	18	26	0.001	0.29	KIWGFGPDGSGANLIYDQTK	R	G	0.95	4.82	0.463	0	0	2	0	2	2167.08
Replete	jgi|Auran1|72618	93270.6	1	18	18	26	0.001	0.29	LYMEAHPLSDELADAIEDGK	R	I	0.95	4.89	0.596	0	0	4	0	2	2233.03
Replete	jgi|Auran1|72618	93270.6	1	18	18	26	0.001	0.29	STGISMFFEYK	K	M	0.95	3.35	0.486	0	1	0	0	2	1325.61
Replete	jgi|Auran1|72618	93270.6	1	18	18	26	0.001	0.29	SVESVNVIIATYNDELLGDCQVYPEK	R	G	0.95	4.48	0.47	0	0	1	0	2	2955.43
Replete	jgi|Auran1|72618	93270.6	1	18	18	26	0.001	0.29	TCDTSEGAPLMMYISK	R	M	0.95	2.77	0.369	0	1	0	0	2	1819.79
Replete	jgi|Auran1|72618	93270.6	1	18	18	26	0.001	0.29	VENLYDGPLDDAAANAIR	R	T	0.95	5.5	0.557	0	1	0	0	2	1916.94
Replete	jgi|Auran1|72618	93270.6	1	18	18	26	0.001	0.29	VSDPVVSYR	K	E	0.95	2.58	0.459	0	1	0	0	2	1021.53
Replete	jgi|Auran1|72618	93270.6	1	18	18	26	0.001	0.29	WLPVGDAILEMIVVK	K	L	0.95	3.73	0.569	0	2	0	0	2	1698.95
Replete	jgi|Auran1|72618	93270.6	1	18	18	26	0.001	0.29	YRVENLYDGPLDDAAANAIR	R	T	0.95	5.77	0.442	0	0	2	0	2	2236.1
Replete	jgi|Auran1|70153	35090.6	0.998	2	2	3	0.0001	0.101	IFALDEADEMLSR	K	G	0.95	1.96	0.354	0	1	0	0	2	1509.73
Replete	jgi|Auran1|70153	35090.6	0.998	2	2	3	0.0001	0.101	VALFSATMPLEVLEITSR	R	F	0.95	4.82	0.613	0	2	0	0	2	1993.07
Replete	jgi|Auran1|23580	25738.5	1	4	5	7	0.0003	0.325	ETADHFGGCDVLVNNAGITK	K	D	0.95	4.85	0.324	0	0	1	0	2	2117.99
Replete	jgi|Auran1|23580	25738.5	1	4	5	7	0.0003	0.325	GVTVNAVCPGFIGTEMANELGEDMLNK	R	V	0.95	3.69	0.378	0	0	1	0	2	2882.34
Replete	jgi|Auran1|23580	25738.5	1	4	5	7	0.0003	0.325	IINMSSVVGLFGNPGQANYAAAK	R	G	0.95	5.08	0.627	0	1	2	0	2	2322.19
Replete	jgi|Auran1|23580	25738.5	1	4	5	7	0.0003	0.325	LGEADEVAGLVR	R	Y	0.95	3.83	0.395	0	2	0	0	2	1228.65
Replete	jgi|Auran1|296	95627.4	1	2	2	2	0.0001	0.0429	AALAACVPVLPAEAAPLELPCLFK	K	A	0.95	2.58	0.27	0	0	1	0	2	2521.36
Replete	jgi|Auran1|296	95627.4	1	2	2	2	0.0001	0.0429	QQIEYVVTDPETLK	K	Q	0.95	2.81	0.454	0	1	0	0	2	1662.86
Replete	jgi|Auran1|64743	148959	1	6	6	7	0.0003	0.0696	ADVQLWTTPSYIPSK	K	F	0.95	4.07	0.553	0	1	0	0	2	1705.88
Replete	jgi|Auran1|64743	148959	1	6	6	7	0.0003	0.0696	ALIELTSGPNQVK	K	Q	0.95	3.3	0.465	0	1	0	0	2	1369.77
Replete	jgi|Auran1|64743	148959	1	6	6	7	0.0003	0.0696	NPFYAVIQTPDPATTIR	K	V	0.95	4.89	0.597	0	1	0	0	2	1903.99
Replete	jgi|Auran1|64743	148959	1	6	6	7	0.0003	0.0696	QFFEIYCSSGYK	K	N	0.95	2.75	0.329	0	1	0	0	2	1528.68
Replete	jgi|Auran1|64743	148959	1	6	6	7	0.0003	0.0696	VINQNTVEFPFEAK	R	V	0.95	4.14	0.568	0	2	0	0	2	1635.84
Replete	jgi|Auran1|64743	148959	1	6	6	7	0.0003	0.0696	VVECDVADAAGSQPEMGGGSFSGGLLR	K	-	0.95	4.27	0.462	0	0	1	0	2	2682.21
Replete	jgi|Auran1|26092	51181.3	0.998	2	2	2	0.0001	0.0688	IELDFEAGAPVALR	K	E	0.95	3.05	0.504	0	1	0	0	2	1500.81
Replete	jgi|Auran1|26092	51181.3	0.998	2	2	2	0.0001	0.0688	QDLLDYAALHGIPVSQTK	R	K	0.95	2.8	0.385	0	0	1	0	2	1969.04
Replete	jgi|Auran1|29693	23415.7	0.998	2	2	2	0.0001	0.145	AFLAELYDQAVADAVR	R	I	0.95	4.51	0.419	0	1	0	0	2	1751.9
Replete	jgi|Auran1|29693	23415.7	0.998	2	2	2	0.0001	0.145	VYEDGLKPVLCIGETK	R	E	0.95	2.1	0.219	0	0	1	0	2	1820.95
Replete	jgi|Auran1|22992	50372.6	1	2	2	2	0.0001	0.0787	FVAGTVADAAPIIPISAVLK	K	Y	0.95	4.14	0.572	0	1	0	0	2	1953.14
Replete	jgi|Auran1|22992	50372.6	1	2	2	2	0.0001	0.0787	VDLVKPDAALAQHEQIK	K	K	0.95	2.47	0.271	0	0	1	0	2	1875.03
Replete	jgi|Auran1|23507	40166.1	1	3	3	3	0.0001	0.129	ALATEMVDADMAELESELK	K	C	0.95	2.61	0.287	0	1	0	0	2	2097.96
Replete	jgi|Auran1|23507	40166.1	1	3	3	3	0.0001	0.129	LYQASTSELYGK	R	V	0.95	3.32	0.57	0	1	0	0	2	1359.68
Replete	jgi|Auran1|23507	40166.1	1	3	3	3	0.0001	0.129	VQAIPQTETTPFYPR	K	S	0.95	3.41	0.512	0	1	0	0	2	1747.9
Replete	-72120	285232	1	2	2	2	0.0001	0.0125	HYSVFDEPSACWGPVGLDR	R	L	0.95	2.5	0.301	0	0	1	0	2	2191.99
Replete	-72120	285232	1	2	2	2	0.0001	0.0125	LDDNSASSRPTFASR	R	P	0.95	2.51	0.205	0	1	0	0	1	1623.77
Replete	jgi|Auran1|19481	17185.4	1	3	3	5	0.0002	0.244	GVTAWANVPDAGK	K	L	0.95	2.82	0.357	0	1	0	0	2	1285.65
Replete	jgi|Auran1|19481	17185.4	1	3	3	5	0.0002	0.244	LGSIPGPFGLR	R	L	0.95	3.21	0.267	0	1	0	0	2	1113.64
Replete	jgi|Auran1|19481	17185.4	1	3	3	5	0.0002	0.244	LWDPIGSMSAMDESTK	R	A	0.95	4.23	0.616	0	3	0	0	2	1799.78
Replete	jgi|Auran1|70540	26314.8	0.998	2	3	6	0.0002	0.17	GYEPGLTPPEQWDAIPLYGK	R	L	0.95	4.3	0.579	0	3	1	0	2	2231.1
Replete	jgi|Auran1|70540	26314.8	0.998	2	3	6	0.0002	0.17	VAMAAFLGYLAGSTELVSGPHK	R	I	0.95	3.34	0.454	0	0	2	0	2	2235.15
Replete	jgi|Auran1|29608	76667.8	0.998	2	2	2	0.0001	0.035	AADVGADLVGK	K	V	0.95	1.99	0.253	1	0	0	0	2	1015.54	jgi|Auran1|70885
Replete	jgi|Auran1|29608	76667.8	0.998	2	2	2	0.0001	0.035	SVGLAAAEMVQEVER	K	Q	0.95	3.13	0.409	0	1	0	0	2	1604.8
Replete	jgi|Auran1|36703	46034.2	1	3	3	3	0.0001	0.119	ADVYYFCSPNNPTGAVATR	R	A	0.95	4.72	0.6	0	1	0	0	2	2102.96
Replete	jgi|Auran1|36703	46034.2	1	3	3	3	0.0001	0.119	EIDTLIDYYLGNAEILR	K	G	0.95	3.16	0.458	0	1	0	0	2	2011.04
Replete	jgi|Auran1|36703	46034.2	1	3	3	3	0.0001	0.119	SEGTPTSIFEIEGSR	R	Q	0.95	3.75	0.574	0	1	0	0	2	1609.77
Replete	jgi|Auran1|39321	48750.9	1	4	4	4	0.0002	0.166	AEEALAFPNAFGVTVR	R	Y	0.95	4.23	0.4	0	1	0	0	2	1691.88
Replete	jgi|Auran1|39321	48750.9	1	4	4	4	0.0002	0.166	EAFGTPCYVYDAPTLVAR	K	A	0.95	4.02	0.455	0	1	0	0	2	2029.97
Replete	jgi|Auran1|39321	48750.9	1	4	4	4	0.0002	0.166	ISLSTQQLDDDFGDLVK	K	E	0.95	4.85	0.621	0	1	0	0	2	1893.95
Replete	jgi|Auran1|39321	48750.9	1	4	4	4	0.0002	0.166	TNVGGPSSSFGIWHEDFDEVAAIAGK	K	H	0.95	3.97	0.483	0	0	1	0	2	2691.27
Replete	jgi|Auran1|32655	14968.4	0.999	2	2	2	0.0001	0.321	FLQGPGTFPGTVAELAK	R	G	0.95	3.51	0.427	0	1	0	0	2	1732.93
Replete	jgi|Auran1|32655	14968.4	0.999	2	2	2	0.0001	0.321	VVNYVGVQIPVAGPLPKPGDEPVPFPAK	R	E	0.95	3.59	0.499	0	0	1	0	2	2884.6
Replete	jgi|Auran1|55209	37417.3	1	6	6	9	0.0003	0.265	ANLDYDAIVR	K	N	0.95	2.97	0.363	0	2	0	0	2	1149.59
Replete	jgi|Auran1|55209	37417.3	1	6	6	9	0.0003	0.265	FIIGGPQGDAGLTGR	K	K	0.95	4.44	0.538	0	2	0	0	2	1458.77
Replete	jgi|Auran1|55209	37417.3	1	6	6	9	0.0003	0.265	GLSCDSCEVLVR	K	I	0.95	3.52	0.444	0	2	0	0	2	1394.64
Replete	jgi|Auran1|55209	37417.3	1	6	6	9	0.0003	0.265	IGFDSFVDDLGSVDSK	K	G	0.95	5.61	0.611	0	1	0	0	2	1700.8
Replete	jgi|Auran1|55209	37417.3	1	6	6	9	0.0003	0.265	TQVTIEYLQHSDGSVTPK	K	M	0.95	3.44	0.414	0	0	1	0	2	2003.01
Replete	jgi|Auran1|55209	37417.3	1	6	6	9	0.0003	0.265	VADQVSDAVLDACLTADPYSK	K	V	0.95	3.12	0.269	0	0	1	0	2	2238.06
Replete	jgi|Auran1|54676	41704.5	1	3	3	3	0.0001	0.0997	FLEVNQEANK	K	L	0.95	2.76	0.334	0	1	0	0	2	1191.6
Replete	jgi|Auran1|54676	41704.5	1	3	3	3	0.0001	0.0997	NGDILTGTVVQYDGPQK	K	A	0.95	3.14	0.317	0	1	0	0	2	1804.91
Replete	jgi|Auran1|54676	41704.5	1	3	3	3	0.0001	0.0997	VFSLAEETAAK	R	Y	0.95	2.73	0.255	0	1	0	0	2	1165.61
Replete	jgi|Auran1|72571	28641.5	1	3	4	6	0.0002	0.177	LDGTMIGDVGFDPLR	K	L	0.95	3.59	0.493	0	3	0	0	2	1621.79
Replete	jgi|Auran1|72571	28641.5	1	3	4	6	0.0002	0.177	SQAELDDLALK	K	E	0.95	3.07	0.386	0	1	0	0	2	1202.63
Replete	jgi|Auran1|72571	28641.5	1	3	4	6	0.0002	0.177	TYGDTPWDLGFDPLCFQEGK	K	S	0.95	4.13	0.531	0	1	1	0	2	2346.04
Replete	jgi|Auran1|26536	52680.8	1	5	5	5	0.0002	0.181	GTLGGTCLNVGCIPSK	R	A	0.95	3.97	0.509	0	1	0	0	2	1633.8
Replete	jgi|Auran1|26536	52680.8	1	5	5	5	0.0002	0.181	IPSIYAFGDVVDGPMLAHK	K	A	0.95	4.13	0.457	0	0	1	0	2	2046.04
Replete	jgi|Auran1|26536	52680.8	1	5	5	5	0.0002	0.181	IVDSTGALVLDK	K	I	0.95	2.67	0.148	0	1	0	0	2	1230.69
Replete	jgi|Auran1|26536	52680.8	1	5	5	5	0.0002	0.181	TEEQLKDEGVDYVVGSFPFSANSR	K	A	0.95	4.85	0.469	0	0	1	0	2	2674.26
Replete	jgi|Auran1|26536	52680.8	1	5	5	5	0.0002	0.181	VTVVEYLGNIVPGVDKEVGK	K	A	0.95	2.74	0.385	0	0	1	0	2	2115.17
Replete	jgi|Auran1|52186	25269.8	1	3	3	4	0.0002	0.153	LVCINADGVER	R	E	0.95	2.52	0.428	0	1	0	0	2	1245.63
Replete	jgi|Auran1|52186	25269.8	1	3	3	4	0.0002	0.153	SGSAADTQAVSDYVR	R	H	0.95	4.67	0.582	0	2	0	0	2	1526.71
Replete	jgi|Auran1|52186	25269.8	1	3	3	4	0.0002	0.153	VSTGTYIANR	R	V	0.95	2.57	0.373	0	1	0	0	2	1081.56
Replete	-60718	154523	0.998	2	2	2	0.0001	0.0295	AIAAADAVAAAHAR	R	A	0.95	1.9	0.305	0	1	0	0	2	1278.69
Replete	-60718	154523	0.998	2	2	2	0.0001	0.0295	ALDATADGAGLIGACADGVSEVHAELSRAK	R	S	0.95	3.03	0.233	0	0	1	0	2	2925.44
Replete	jgi|Auran1|72539	78824.7	1	3	3	3	0.0001	0.0823	AGGDVITVYELPAMTLLGK	K	K	0.95	3.89	0.44	0	1	0	0	2	1948.05
Replete	jgi|Auran1|72539	78824.7	1	3	3	3	0.0001	0.0823	IVATGVLQPLEGAFFK	R	F	0.95	5.12	0.356	0	1	0	0	2	1689.96
Replete	jgi|Auran1|72539	78824.7	1	3	3	3	0.0001	0.0823	VNAYADLATLDGLAAAYAPEPK	K	A	0.95	4.21	0.426	0	0	1	0	2	2234.13
Replete	jgi|Auran1|70885	80974.1	0.998	2	2	2	0.0001	0.0718	AADVGADLVGK	K	V	0.95	1.99	0.253	1	0	0	0	2	1015.54	jgi|Auran1|29608
Replete	jgi|Auran1|70885	80974.1	0.998	2	2	2	0.0001	0.0718	ASQYYTDYAYEPVR	R	R	0.95	3.05	0.355	0	1	0	0	2	1725.78
Replete	jgi|Auran1|70885	80974.1	0.998	2	2	2	0.0001	0.0718	TEGTEAAPMAALQRGYAVTLGLAFVGFAGCCR	R	T	0.95	2.87	0.208	0	0	1	0	2	3345.62
Replete	jgi|Auran1|72529	103656	1	9	10	15	0.0006	0.144	CTVGLDVASSEFK	K	V	0.95	3.76	0.578	0	1	0	0	2	1412.67
Replete	jgi|Auran1|72529	103656	1	9	10	15	0.0006	0.144	DGGSLFMGK	R	G	0.95	2.31	0.357	0	1	0	0	2	911.43
Replete	jgi|Auran1|72529	103656	1	9	10	15	0.0006	0.144	IDEAMFALDGTPNK	K	A	0.95	3.95	0.0927	0	1	0	0	2	1521.73
Replete	jgi|Auran1|72529	103656	1	9	10	15	0.0006	0.144	ISADYPIVTIEDPFDQDDWDNWTK	K	I	0.95	3.16	0.346	0	0	1	0	2	2883.3
Replete	jgi|Auran1|72529	103656	1	9	10	15	0.0006	0.144	LSGDELLAMYAK	K	I	0.95	3.94	0.495	0	3	0	0	2	1326.66
Replete	jgi|Auran1|72529	103656	1	9	10	15	0.0006	0.144	SGETEDDYIADLAVGLCTGEIK	R	T	0.95	5.95	0.699	0	1	1	0	2	2356.09
Replete	jgi|Auran1|72529	103656	1	9	10	15	0.0006	0.144	VDGENAYDLDFK	K	T	0.95	4.18	0.569	0	1	0	0	2	1385.62
Replete	jgi|Auran1|72529	103656	1	9	10	15	0.0006	0.144	VNQIGSISESIQAVIDSK	K	R	0.95	5.81	0.629	0	2	0	0	2	1888
Replete	jgi|Auran1|72529	103656	1	9	10	15	0.0006	0.144	VQIVGDDLTVTNPAK	K	I	0.95	5.33	0.593	0	3	0	0	2	1569.85
Replete	jgi|Auran1|52124	44906.9	1	3	3	3	0.0001	0.12	EIIGVQAFNLDR	K	V	0.947	2.65	0.159	0	1	0	0	2	1374.74
Replete	jgi|Auran1|52124	44906.9	1	3	3	3	0.0001	0.12	IPVTVLTGFLGSGK	R	T	0.95	2.45	0.325	0	1	0	0	2	1388.82
Replete	jgi|Auran1|52124	44906.9	1	3	3	3	0.0001	0.12	LDDEKPEGVENEAVEQLAFADK	R	I	0.95	3.75	0.493	0	0	1	0	2	2446.16
Replete	jgi|Auran1|71945	140963	1	3	3	3	0.0001	0.0374	AYAGETYESAYATALSYVLK	K	I	0.95	6.42	0.723	0	1	0	0	2	2171.05
Replete	jgi|Auran1|71945	140963	1	3	3	3	0.0001	0.0374	DKAPEPVTAEAVEEPVAV	R	-	0.95	4.28	0.494	0	1	0	0	2	1850.94
Replete	jgi|Auran1|71945	140963	1	3	3	3	0.0001	0.0374	VYTVETYESSK	K	A	0.95	3.27	0.497	0	1	0	0	2	1305.62
Replete	jgi|Auran1|70003	15897.4	1	7	7	10	0.0004	0.459	ADRDEASPYAAMLAAQDVAER	K	C	0.95	4.68	0.523	0	0	3	0	2	2266.04
Replete	jgi|Auran1|70003	15897.4	1	7	7	10	0.0004	0.459	AGMKIGRIEDVTPIPSDSTR	R	R	0.95	2.09	0.359	0	0	1	0	2	2143.12
Replete	jgi|Auran1|70003	15897.4	1	7	7	10	0.0004	0.459	IEDVTPIPSDSTR	R	R	0.95	3.62	0.529	0	2	0	0	2	1429.72
Replete	jgi|Auran1|70003	15897.4	1	7	7	10	0.0004	0.459	KTEEIKEVTTLGPK	K	V	0.95	3.04	0.32	0	0	1	0	2	1572.89
Replete	jgi|Auran1|70003	15897.4	1	7	7	10	0.0004	0.459	TEEIKEVTTLGPK	K	V	0.95	3.48	0.352	0	0	1	0	2	1444.79
Replete	jgi|Auran1|70003	15897.4	1	7	7	10	0.0004	0.459	TPGPGAQSALR	K	A	0.95	3.09	0.429	0	1	0	0	2	1054.56
Replete	jgi|Auran1|70003	15897.4	1	7	7	10	0.0004	0.459	VKADRDEASPYAAMLAAQDVAER	K	C	0.95	2.34	0.221	0	0	1	0	2	2493.2
Replete	jgi|Auran1|18886	15308.6	1	5	6	8	0.0003	0.434	EIAQDFK	R	T	0.95	2.3	0.04	1	0	0	0	2	850.431
Replete	jgi|Auran1|18886	15308.6	1	5	6	8	0.0003	0.434	EIAQDFKTDLR	R	F	0.95	3.05	0.453	0	1	0	0	2	1335.69
Replete	jgi|Auran1|18886	15308.6	1	5	6	8	0.0003	0.434	FQGSAVLALQEAAEAYLVGLFEDTNLCAIHAK	R	R	0.95	6.9	0.643	0	0	1	0	2	3449.74
Replete	jgi|Auran1|18886	15308.6	1	5	6	8	0.0003	0.434	STELLVR	K	K	0.95	2.06	0.203	2	2	0	0	2	817.478
Replete	jgi|Auran1|18886	15308.6	1	5	6	8	0.0003	0.434	YRPGTVALR	R	E	0.95	2.37	0.282	0	1	0	0	2	1032.6
Replete	jgi|Auran1|68429	139605	1	3	3	3	0.0001	0.027	CEEIDDERDCMSEGAR	K	K	0.95	2.56	0.435	0	0	1	0	2	1971.75	jgi|Auran1|72267
Replete	jgi|Auran1|68429	139605	1	3	3	3	0.0001	0.027	RAALAEAAAAR	R	D	0.95	2.85	0.15	0	1	0	0	2	1070.61
Replete	jgi|Auran1|68429	139605	1	3	3	3	0.0001	0.027	YANICAWSFK	K	K	0.95	2.28	0.385	0	1	0	0	2	1259.59	jgi|Auran1|72267
Replete	jgi|Auran1|71916	259116	1	12	12	13	0.0005	0.094	ADDCDWVALNTAER	K	C	0.95	3.65	0.361	0	1	0	0	2	1635.71
Replete	jgi|Auran1|71916	259116	1	12	12	13	0.0005	0.094	APSASYQCLSCK	K	E	0.95	3.88	0.563	0	1	0	0	2	1371.6
Replete	jgi|Auran1|71916	259116	1	12	12	13	0.0005	0.094	DDVVFEISDATR	R	R	0.95	2.2	0.295	0	1	0	0	2	1366.65
Replete	jgi|Auran1|71916	259116	1	12	12	13	0.0005	0.094	DFAYDVPWDLVAATAYK	R	G	0.95	4.51	0.605	0	2	0	0	2	1944.94
Replete	jgi|Auran1|71916	259116	1	12	12	13	0.0005	0.094	ESSGSTDTFFVDETLKPADQCVDSPVWR	K	A	0.95	5.12	0.545	0	0	1	0	2	3173.44
Replete	jgi|Auran1|71916	259116	1	12	12	13	0.0005	0.094	LPDVAPGGGSWETYFKDDELEK	K	G	0.95	2.73	0.408	0	0	1	0	2	2453.15
Replete	jgi|Auran1|71916	259116	1	12	12	13	0.0005	0.094	SQGGWDDETNSVIINPDLDALIATK	R	I	0.95	3.92	0.422	0	0	1	0	2	2672.31
Replete	jgi|Auran1|71916	259116	1	12	12	13	0.0005	0.094	TEDLASTTAAYVAPVLVIGEYVEVTPK	K	T	0.95	3.89	0.488	0	0	1	0	2	2836.49
Replete	jgi|Auran1|71916	259116	1	12	12	13	0.0005	0.094	TVEIPAALVDGDR	K	Y	0.95	2.28	0.214	0	1	0	0	2	1355.72
Replete	jgi|Auran1|71916	259116	1	12	12	13	0.0005	0.094	VVDALNEGDDYER	R	F	0.95	3.49	0.546	0	1	0	0	2	1494.67
Replete	jgi|Auran1|71916	259116	1	12	12	13	0.0005	0.094	VVTFTIPEGIAPGDDYR	K	F	0.95	2.65	0.27	0	1	0	0	2	1849.93
Replete	jgi|Auran1|71916	259116	1	12	12	13	0.0005	0.094	YAANLPTSSPTLAPTTSAPTAAGQKGK	R	N	0.95	2.66	0.16	0	1	0	0	2	2601.35
Replete	jgi|Auran1|67892	60291.1	1	9	9	16	0.0006	0.245	AAAPAPAPEPAAK	K	P	0.95	2.25	0.515	0	1	0	0	1	1161.63
Replete	jgi|Auran1|67892	60291.1	1	9	9	16	0.0006	0.245	AAAPAPAPEPAAKPVK	K	A	0.95	3.2	0.244	0	1	0	0	2	1485.84
Replete	jgi|Auran1|67892	60291.1	1	9	9	16	0.0006	0.245	AAPAASSGPPNVAAIAVGAAPFAALPVFGLVGLR	K	S	0.95	5.36	0.619	0	0	3	0	2	3100.73
Replete	jgi|Auran1|67892	60291.1	1	9	9	16	0.0006	0.245	AAVAPPPPPPPAPVAAK	K	A	0.95	3.33	0.169	0	0	1	0	2	1547.9
Replete	jgi|Auran1|67892	60291.1	1	9	9	16	0.0006	0.245	ALLGSGGGLVASVAALFLSQPGPAPAPPAK	K	G	0.95	3.49	0.522	0	0	2	0	2	2714.52
Replete	jgi|Auran1|67892	60291.1	1	9	9	16	0.0006	0.245	GGLGQLNPFETK	R	A	0.95	3.74	0.526	0	2	0	0	2	1260.66
Replete	jgi|Auran1|67892	60291.1	1	9	9	16	0.0006	0.245	GPGFSLPSLPAAAPK	K	K	0.95	3.29	0.478	0	2	0	0	2	1409.78
Replete	jgi|Auran1|67892	60291.1	1	9	9	16	0.0006	0.245	TVESFAIPAEESVTPPTK	K	V	0.95	4.27	0.528	0	3	0	0	2	1902.97
Replete	jgi|Auran1|67892	60291.1	1	9	9	16	0.0006	0.245	VKGEALFGGSK	K	K	0.95	2.42	0.186	0	1	0	0	2	1092.61
Replete	jgi|Auran1|22889	27721.1	0.998	2	2	2	0.0001	0.132	GFVENVSPQEQWDNIPLIGK	R	L	0.95	4.49	0.599	0	1	0	0	2	2270.15
Replete	jgi|Auran1|22889	27721.1	0.998	2	2	2	0.0001	0.132	YRGESLTYPTPPYR	R	G	0.95	3.38	0.513	0	1	0	0	2	1699.84
Replete	jgi|Auran1|20379	17566	1	5	5	9	0.0003	0.344	AGELTADEVEK	R	L	0.95	3.2	0.412	0	1	0	0	2	1161.56
Replete	jgi|Auran1|20379	17566	1	5	5	9	0.0003	0.344	IPAWFLNR	K	Q	0.95	2.7	0.352	0	2	0	0	2	1016.57
Replete	jgi|Auran1|20379	17566	1	5	5	9	0.0003	0.344	LVAIIQNPK	K	Q	0.95	2.83	0.297	0	2	0	0	2	995.625
Replete	jgi|Auran1|20379	17566	1	5	5	9	0.0003	0.344	VMFALTSIPGVGR	K	R	0.95	3.08	0.437	0	2	0	0	2	1363.74
Replete	jgi|Auran1|20379	17566	1	5	5	9	0.0003	0.344	YSQAFANTLQQK	K	L	0.95	4.14	0.549	0	2	0	0	2	1398.7
Replete	jgi|Auran1|30567	16100.5	1	4	5	6	0.0002	0.329	ALVAYYQK	K	Y	0.95	2.35	0.293	0	1	0	0	2	955.525
Replete	jgi|Auran1|30567	16100.5	1	4	5	6	0.0002	0.329	GGGFTAQIYAIR	K	Q	0.95	2.74	0.424	0	1	0	0	2	1253.66
Replete	jgi|Auran1|30567	16100.5	1	4	5	6	0.0002	0.329	TFEPVLLLGQHR	K	F	0.95	2.71	0.423	0	1	1	0	2	1409.79
Replete	jgi|Auran1|30567	16100.5	1	4	5	6	0.0002	0.329	VNGCPIELLEPEILR	K	L	0.95	4.39	0.408	0	2	0	0	2	1751.94
Replete	Promega trypsin artifact 5 K to R mods (2239.1, 2914)(1987, 2003)	5542.5	1	2	3	7	0.0003	1	IITHPNFNGNTLDNDIMLIRLSSPATLNSR	R	-	0.95	4.78	0.529	0	0	4	0	2	3337.73
Replete	Promega trypsin artifact 5 K to R mods (2239.1, 2914)(1987, 2003)	5542.5	1	2	3	7	0.0003	1	LGEHNIDVLEGNEQFINAAR	-	I	0.95	5.57	0.557	0	1	2	0	2	2239.11
Replete	Promega trypsin artifact 5 K to R mods (2239.1, 2914)(1987, 2003)	5542.5	1	2	3	7	0.0003	1	LSSPATLNSR	R	-	0.95	2.13	0.433	0	3	0	0	2	1045.56	gi|136429|
Replete	jgi|Auran1|37238	109133	1	2	2	2	0.0001	0.0403	AASAPAFEGADMSTK	R	L	0.95	3.02	0.517	0	1	0	0	2	1469.66
Replete	jgi|Auran1|37238	109133	1	2	2	2	0.0001	0.0403	IPAGEVTPAGLMALGAVADEYGLYCK	R	I	0.95	3.26	0.401	0	0	1	0	2	2682.32
Replete	jgi|Auran1|18780	41453.2	0.998	2	2	2	0.0001	0.052	DVQGIIATTSK	R	L	0.95	2.63	0.349	0	1	0	0	2	1132.62
Replete	jgi|Auran1|18780	41453.2	0.998	2	2	2	0.0001	0.052	LPDDDGDLPR	K	S	0.95	2.99	0.31	0	1	0	0	2	1112.52
Replete	-61218	280971	0.997	2	2	2	0.0001	0.0118	ALIAELGSGGGAIK	K	A	0.95	2.23	0.328	0	1	0	0	2	1256.72
Replete	-61218	280971	0.997	2	2	2	0.0001	0.0118	IILEPDDDFTEMTNLLVK	K	I	0.946	2.19	0.22	0	0	1	0	2	2106.07
Replete	jgi|Auran1|27009	27009.4	1	4	4	6	0.0002	0.214	AAMLGIFGFLAESK	R	V	0.95	4.35	0.565	0	1	0	0	2	1470.77
Replete	jgi|Auran1|27009	27009.4	1	4	4	6	0.0002	0.214	FPSFAEAYK	K	E	0.95	2.39	0.303	0	2	0	0	2	1059.52
Replete	jgi|Auran1|27009	27009.4	1	4	4	6	0.0002	0.214	GGQPGKFPSFAEAYK	K	E	0.95	2.26	0.264	0	1	0	0	2	1583.79
Replete	jgi|Auran1|27009	27009.4	1	4	4	6	0.0002	0.214	MTLGGADWPTGSPAEQWDALPAASK	K	W	0.95	4.73	0.523	0	0	2	0	2	2557.2
Replete	jgi|Auran1|38382	19515.3	1	3	3	4	0.0002	0.2	LILNCCVGESGDR	K	L	0.95	3.5	0.58	0	1	0	0	2	1492.69
Replete	jgi|Auran1|38382	19515.3	1	3	3	4	0.0002	0.2	VLEQLTGQEPVYSK	R	A	0.95	4.64	0.612	0	2	0	0	2	1590.84
Replete	jgi|Auran1|38382	19515.3	1	3	3	4	0.0002	0.2	YEGIVLG	K	-	0.95	1.61	0.406	1	0	0	0	2	750.404
Replete	jgi|Auran1|26433	64492.4	0.998	2	2	2	0.0001	0.0631	DVGEALLALGLAAVTPPR	K	N	0.95	2.49	0.494	0	1	0	0	2	1763.01
Replete	jgi|Auran1|26433	64492.4	0.998	2	2	2	0.0001	0.0631	SPSASSAARPQEEFAGDAAK	R	A	0.95	2.82	0.266	0	0	1	0	2	1976.93
Replete	jgi|Auran1|36610	39520.4	1	18	29	147	0.0055	0.593	ALNDAYGIDEGLMTTVHAMTATQK	K	V	0.95	4.32	0.576	0	2	14	0	2	2567.21
Replete	jgi|Auran1|36610	39520.4	1	18	29	147	0.0055	0.593	AVSCASCTTNGLAPMVK	K	A	0.95	3.83	0.644	0	8	0	0	2	1782.82
Replete	jgi|Auran1|36610	39520.4	1	18	29	147	0.0055	0.593	CASGNIIPSSTGAAK	R	A	0.95	4.18	0.467	0	6	0	0	2	1433.71
Replete	jgi|Auran1|36610	39520.4	1	18	29	147	0.0055	0.593	DDSPTVVMGVNEETYDSAMK	K	A	0.95	5.39	0.684	0	7	4	0	2	2187.94
Replete	jgi|Auran1|36610	39520.4	1	18	29	147	0.0055	0.593	DPAEIPFSAMGAEYICESTGAFLTAEK	R	V	0.95	5.74	0.488	0	0	1	0	2	2905.33
Replete	jgi|Auran1|36610	39520.4	1	18	29	147	0.0055	0.593	ETSYEEICAEIQK	K	R	0.95	4.49	0.569	0	4	2	0	2	1599.72
Replete	jgi|Auran1|36610	39520.4	1	18	29	147	0.0055	0.593	ETSYEEICAEIQKR	K	A	0.95	3.98	0.492	0	1	1	0	2	1755.82
Replete	jgi|Auran1|36610	39520.4	1	18	29	147	0.0055	0.593	IDGVLTPTSHTR	K	D	0.95	3.09	0.331	0	2	2	0	2	1296.69
Replete	jgi|Auran1|36610	39520.4	1	18	29	147	0.0055	0.593	IIFSAPAKDDSPTVVMGVNEETYDSAMK	K	A	0.95	7.39	0.663	0	0	12	0	2	3047.42
Replete	jgi|Auran1|36610	39520.4	1	18	29	147	0.0055	0.593	KIIFSAPAK	K	D	0.95	2.99	0.413	0	1	0	0	2	974.604
Replete	jgi|Auran1|36610	39520.4	1	18	29	147	0.0055	0.593	KIIFSAPAKDDSPTVVMGVNEETYDSAMK	K	A	0.95	7.65	0.683	0	0	1	0	2	3159.52
Replete	jgi|Auran1|36610	39520.4	1	18	29	147	0.0055	0.593	LVNSGASNEYMAYQFK	K	Y	0.95	4.57	0.58	0	18	3	0	2	1837.84
Replete	jgi|Auran1|36610	39520.4	1	18	29	147	0.0055	0.593	TVAWYDNEWGYSNR	K	V	0.95	4.96	0.599	0	6	1	0	2	1760.77
Replete	jgi|Auran1|36610	39520.4	1	18	29	147	0.0055	0.593	VPTADVSVVDLTCLLSK	R	E	0.95	5.5	0.698	0	20	2	0	2	1816.97
Replete	jgi|Auran1|36610	39520.4	1	18	29	147	0.0055	0.593	VVDASSNKDWR	K	G	0.95	2.55	0.418	0	1	1	0	2	1276.63
Replete	jgi|Auran1|36610	39520.4	1	18	29	147	0.0055	0.593	VVDLMCHMAAVDLK	R	V	0.95	3.05	0.415	0	8	7	0	2	1601.79
Replete	jgi|Auran1|36610	39520.4	1	18	29	147	0.0055	0.593	YPGTVEATDDGLK	R	I	0.95	4.02	0.541	0	5	0	0	2	1365.65
Replete	jgi|Auran1|36610	39520.4	1	18	29	147	0.0055	0.593	YPGTVEATDDGLKIDGVLTPTSHTR	R	D	0.95	6.04	0.601	0	1	6	0	2	2643.33
Replete	jgi|Auran1|54518	26778.9	0.998	2	2	2	0.0001	0.102	GGVPGYYPPIK	K	G	0.95	2.04	0.319	0	1	0	0	2	1147.62
Replete	jgi|Auran1|54518	26778.9	0.998	2	2	2	0.0001	0.102	LAMIGLFSFLAEAR	R	V	0.95	4.14	0.458	0	1	0	0	2	1554.84
Replete	jgi|Auran1|15689	20261.2	0.998	2	3	9	0.0003	0.133	ALTCELQNGR	R	A	0.95	3.57	0.303	0	5	0	0	2	1161.57	jgi|Auran1|59964,jgi|Auran1|59955,jgi|Auran1|60145
Replete	jgi|Auran1|15689	20261.2	0.998	2	3	9	0.0003	0.133	FADIGTGFAAIENIPK	K	F	0.95	5.94	0.617	0	3	1	0	2	1663.87
Replete	jgi|Auran1|71877	26833.5	1	5	5	5	0.0002	0.27	FLDGIFVSQK	K	G	0.95	2.92	0.375	0	1	0	0	2	1153.63
Replete	jgi|Auran1|71877	26833.5	1	5	5	5	0.0002	0.27	FLNIPEGVEVTCK	K	S	0.95	3.96	0.569	0	1	0	0	2	1505.77
Replete	jgi|Auran1|71877	26833.5	1	5	5	5	0.0002	0.27	FVYSHFPINVALNGR	R	V	0.95	3.53	0.317	0	0	1	0	2	1733.91
Replete	jgi|Auran1|71877	26833.5	1	5	5	5	0.0002	0.27	HVQLEMEMTTNAAGAPQLK	K	I	0.95	3.49	0.327	0	0	1	0	2	2101.01
Replete	jgi|Auran1|71877	26833.5	1	5	5	5	0.0002	0.27	LLDGVDYVR	K	T	0.95	2.87	0.307	0	1	0	0	2	1049.56
Replete	jgi|Auran1|52007	85134.7	0.998	2	2	2	0.0001	0.0295	RWANHKIMNK	K	W	0.95	1.47	0.285	0	0	1	0	2	1297.7
Replete	jgi|Auran1|52007	85134.7	0.998	2	2	2	0.0001	0.0295	SPYNWSEQLYQR	R	H	0.95	2.66	0.411	0	1	0	0	2	1570.73
Replete	jgi|Auran1|23365	42616.6	1	3	3	3	0.0001	0.156	AGDWIPSPLSDETK	K	L	0.95	2.98	0.416	0	1	0	0	2	1515.73
Replete	jgi|Auran1|23365	42616.6	1	3	3	3	0.0001	0.156	LIFSETPANPTLTLTDLAALSAIAK	K	A	0.95	4.57	0.619	0	1	0	0	2	2571.43
Replete	jgi|Auran1|23365	42616.6	1	3	3	3	0.0001	0.156	QHNDGFHGGMLWFEVKGGSAAGR	K	K	0.95	2.25	0.24	0	0	1	0	2	2458.15
Replete	jgi|Auran1|68367	23743.7	1	4	5	20	0.0008	0.152	DVLTGDSATLDK	R	L	0.95	3.44	0.489	0	2	0	0	2	1234.62
Replete	jgi|Auran1|68367	23743.7	1	4	5	20	0.0008	0.152	EIADMLNAVR	K	G	0.95	2.96	0.307	0	6	0	0	2	1131.58
Replete	jgi|Auran1|68367	23743.7	1	4	5	20	0.0008	0.152	GPVQSMLLDPVK	R	K	0.95	3.72	0.477	0	4	0	0	2	1283.7
Replete	jgi|Auran1|68367	23743.7	1	4	5	20	0.0008	0.152	GPVQSMLLDPVKK	R	W	0.95	4.28	0.392	0	4	4	0	2	1411.8
Replete	jgi|Auran1|23344	32909.1	1	3	3	5	0.0002	0.163	AGIANLFGMAGDQNSSGDDQK	K	K	0.95	5.13	0.608	0	1	0	0	2	2111.93
Replete	jgi|Auran1|23344	32909.1	1	3	3	5	0.0002	0.163	TILYGGIFLYPADVK	R	S	0.95	3.33	0.124	0	1	0	0	2	1669.92
Replete	jgi|Auran1|23344	32909.1	1	3	3	5	0.0002	0.163	VLYEGFPMALLVER	R	A	0.95	3.81	0.572	0	3	0	0	2	1652.87
Replete	jgi|Auran1|71821	121031	1	11	12	16	0.0006	0.161	AVGSAQNVSLVNTVLNTITAAAFK	R	K	0.95	6.13	0.669	0	1	2	0	2	2389.31
Replete	jgi|Auran1|71821	121031	1	11	12	16	0.0006	0.161	DILAGETDGSSYPNGGLR	K	G	0.95	4.91	0.665	0	1	0	0	2	1821.86
Replete	jgi|Auran1|71821	121031	1	11	12	16	0.0006	0.161	GDCIFIPSTLCSYYGDALDEK	R	T	0.95	5.17	0.593	0	1	0	0	2	2424.07
Replete	jgi|Auran1|71821	121031	1	11	12	16	0.0006	0.161	GTHCAGGYVSVDPTSPIFLR	R	G	0.95	3.37	0.439	0	0	1	0	2	2134.04
Replete	jgi|Auran1|71821	121031	1	11	12	16	0.0006	0.161	HNNWSIGTSEGVNLLNVGQVTDK	K	S	0.95	4.55	0.5	0	0	1	0	2	2482.23
Replete	jgi|Auran1|71821	121031	1	11	12	16	0.0006	0.161	IDSGVEAICR	R	Y	0.95	3.69	0.392	0	1	0	0	2	1119.55
Replete	jgi|Auran1|71821	121031	1	11	12	16	0.0006	0.161	MAIASPGNDFR	R	L	0.95	3.35	0.159	0	1	0	0	2	1194.56
Replete	jgi|Auran1|71821	121031	1	11	12	16	0.0006	0.161	NTALFEEMGVLR	K	A	0.95	3.64	0.437	0	2	0	0	2	1395.69
Replete	jgi|Auran1|71821	121031	1	11	12	16	0.0006	0.161	QGLAAGTLDNSEWTK	K	D	0.95	4.65	0.542	0	2	0	0	2	1590.78
Replete	jgi|Auran1|71821	121031	1	11	12	16	0.0006	0.161	SVDALNSEGTR	R	L	0.95	3.34	0.345	0	1	0	0	2	1148.55
Replete	jgi|Auran1|71821	121031	1	11	12	16	0.0006	0.161	VVFNGDNYDEANQDMLTK	K	R	0.95	5.9	0.637	0	2	0	0	2	2088.92
Replete	jgi|Auran1|31056	38173.7	0.998	2	2	2	0.0001	0.0956	TVATANWGDITTEK	K	F	0.95	3.37	0.348	0	1	0	0	2	1506.74
Replete	jgi|Auran1|31056	38173.7	0.998	2	2	2	0.0001	0.0956	VIVSTYQAASGAGAAGMAELR	K	D	0.95	4.7	0.579	0	1	0	0	2	2023.03
Replete	jgi|Auran1|59810	21804.9	0.998	2	2	5	0.0002	0.163	FADVPGGLAAEAVFR	K	D	0.95	3.88	0.437	0	1	0	0	2	1519.79
Replete	jgi|Auran1|59810	21804.9	0.998	2	2	5	0.0002	0.163	LLWDPVGFTAAMPEAELK	K	V	0.95	5.06	0.56	0	4	0	0	2	2004.02
Replete	jgi|Auran1|71803	187625	1	2	2	2	0.0001	0.0153	DGDADTDVMAEMAK	R	K	0.95	3.12	0.582	0	1	0	0	2	1500.58
Replete	jgi|Auran1|71803	187625	1	2	2	2	0.0001	0.0153	SDGAAVFHVVPSR	R	A	0.95	2.1	0.335	0	1	0	0	2	1341.69
Replete	jgi|Auran1|23304	41242.5	0.998	2	2	3	0.0001	0.0668	DSAVNAICYGAK	K	L	0.95	3.23	0.335	0	1	0	0	2	1268.59
Replete	jgi|Auran1|23304	41242.5	0.998	2	2	3	0.0001	0.0668	VVMPLEVLLTSFK	R	R	0.95	2.86	0.411	0	2	0	0	2	1491.85
Replete	jgi|Auran1|72133	78528.1	0.998	2	2	3	0.0001	0.0397	ATDGLPLNFGFSGK	K	G	0.95	3.31	0.507	0	1	0	0	2	1423.72
Replete	jgi|Auran1|72133	78528.1	0.998	2	2	3	0.0001	0.0397	GPLPEDADAGDDNTR	R	V	0.95	3.45	0.636	0	2	0	0	2	1542.67
Replete	jgi|Auran1|37193	104961	0.998	2	2	2	0.0001	0.0335	IPELAALGTVFR	K	S	0.95	2.77	0.428	0	1	0	0	2	1286.75
Replete	jgi|Auran1|37193	104961	0.998	2	2	2	0.0001	0.0335	STLPLELTESETEYVVSCVK	R	H	0.95	2.43	0.299	0	1	0	0	2	2284.13
Replete	jgi|Auran1|20734	65091.4	0.998	2	2	2	0.0001	0.0565	LLPAQDDLDPEMPGFSALQEWR	K	Q	0.95	3.43	0.213	0	0	1	0	2	2544.21
Replete	jgi|Auran1|20734	65091.4	0.998	2	2	2	0.0001	0.0565	TVDQLVTEPFLR	K	N	0.95	2.13	0.339	0	1	0	0	2	1417.77
Replete	jgi|Auran1|20291	132934	1	2	2	2	0.0001	0.0219	LSGEGTSGVSLAR	R	A	0.95	3.5	0.379	0	1	0	0	2	1233.64
Replete	jgi|Auran1|20291	132934	1	2	2	2	0.0001	0.0219	PGASLGAYDFEEAR	R	E	0.95	3.2	0.504	0	1	0	0	1	1482.69
Replete	jgi|Auran1|23206	37672.7	0.998	2	2	3	0.0001	0.406	ADTDYIMVATGTGIAPYR	K	S	0.95	5.26	0.617	0	4	0	0	2	1914.93	jgi|Auran1|31888
Replete	jgi|Auran1|23206	37672.7	0.998	2	2	3	0.0001	0.406	ATILTESPAGK	K	K	0.95	3.59	0.432	0	2	0	0	2	1087.6
Replete	jgi|Auran1|23206	37672.7	0.998	2	2	3	0.0001	0.406	GAVMYFCGLK	K	G	0.95	2.57	0.458	0	3	0	0	2	1145.55	jgi|Auran1|31888
Replete	jgi|Auran1|23206	37672.7	0.998	2	2	3	0.0001	0.406	GMMPGIQDMLK	K	G	0.95	3.5	0.594	0	4	0	0	2	1268.57	jgi|Auran1|31888
Replete	jgi|Auran1|23206	37672.7	0.998	2	2	3	0.0001	0.406	IVGPEATGETCHIIFDHQGK	R	M	0.95	2.68	0.455	0	0	2	0	2	2209.07	jgi|Auran1|31888
Replete	jgi|Auran1|23206	37672.7	0.998	2	2	3	0.0001	0.406	LDYALSR	K	E	0.95	2.46	0.293	0	1	0	0	2	837.447	jgi|Auran1|31888
Replete	jgi|Auran1|23206	37672.7	0.998	2	2	3	0.0001	0.406	LFTETTPAGEAYK	R	G	0.95	3.44	0.606	0	2	0	0	2	1427.71	jgi|Auran1|31888
Replete	jgi|Auran1|23206	37672.7	0.998	2	2	3	0.0001	0.406	LYSIAASRYGDDMTGQTTSLCVR	R	R	0.95	2.35	0.199	0	0	1	0	2	2581.2
Replete	jgi|Auran1|23206	37672.7	0.998	2	2	3	0.0001	0.406	MYIQDKVEEYADEIFDR	K	L	0.95	5	0.442	0	0	2	0	2	2179.99	jgi|Auran1|31888
Replete	jgi|Auran1|23206	37672.7	0.998	2	2	3	0.0001	0.406	RLFTETTPAGEAYK	R	G	0.95	3.8	0.524	0	1	0	0	2	1583.81	jgi|Auran1|31888
Replete	jgi|Auran1|23206	37672.7	0.998	2	2	3	0.0001	0.406	VEEYADEIFDR	K	L	0.95	3.77	0.525	0	1	0	0	2	1385.62	jgi|Auran1|31888
Replete	jgi|Auran1|23206	37672.7	0.998	2	2	3	0.0001	0.406	VMLMPEEKADTDYIMVATGTGIAPYR	K	S	0.95	2.74	0.357	0	0	1	0	2	2920.38	jgi|Auran1|31888
Replete	jgi|Auran1|37153	87541.7	1	7	7	7	0.0003	0.123	ADLVANLGTVAK	K	S	0.95	2.2	0.317	0	1	0	0	2	1171.67
Replete	jgi|Auran1|37153	87541.7	1	7	7	7	0.0003	0.123	FLAVSDAAALDTK	R	K	0.95	3.03	0.494	0	1	0	0	2	1321.7
Replete	jgi|Auran1|37153	87541.7	1	7	7	7	0.0003	0.123	GVVDSDDLPLNVSR	R	E	0.95	4.18	0.516	0	1	0	0	2	1485.76
Replete	jgi|Auran1|37153	87541.7	1	7	7	7	0.0003	0.123	LGIIEDSANR	K	S	0.95	3.49	0.347	0	1	0	0	2	1087.57
Replete	jgi|Auran1|37153	87541.7	1	7	7	7	0.0003	0.123	LMDIIINSLYK	R	N	0.95	2.79	0.157	0	1	0	0	2	1338.73
Replete	jgi|Auran1|37153	87541.7	1	7	7	7	0.0003	0.123	RVETTPTVIVTSQYGNSANMER	R	I	0.95	4.16	0.554	0	0	1	0	2	2469.2
Replete	jgi|Auran1|37153	87541.7	1	7	7	7	0.0003	0.123	TLTIQDSGVGMTK	R	A	0.95	2.54	0.195	0	1	0	0	2	1366.69
Replete	jgi|Auran1|10068	109040	1	16	17	19	0.0007	0.225	AIHDAVLASDLYDEPIGQYK	K	I	0.95	3.65	0.427	0	0	1	0	2	2218.1
Replete	jgi|Auran1|10068	109040	1	16	17	19	0.0007	0.225	ALVSFLGDVADKLEK	K	G	0.95	3.83	0.379	0	1	1	0	2	1604.89
Replete	jgi|Auran1|10068	109040	1	16	17	19	0.0007	0.225	AYLTTSTEGFR	K	T	0.95	2.36	0.364	0	1	0	0	2	1245.61
Replete	jgi|Auran1|10068	109040	1	16	17	19	0.0007	0.225	GGYPEFLGDPENPK	R	V	0.95	3.26	0.374	0	2	0	0	2	1519.71
Replete	jgi|Auran1|10068	109040	1	16	17	19	0.0007	0.225	GQGLAAFGVENK	R	D	0.95	3.74	0.457	0	1	0	0	2	1190.62
Replete	jgi|Auran1|10068	109040	1	16	17	19	0.0007	0.225	ICESLEGQPFEMGR	K	M	0.95	4.03	0.56	0	1	0	0	2	1652.74
Replete	jgi|Auran1|10068	109040	1	16	17	19	0.0007	0.225	ILYYTVPGEDFPALVR	R	R	0.95	2.42	0.254	0	1	0	0	2	1852.99
Replete	jgi|Auran1|10068	109040	1	16	17	19	0.0007	0.225	ITKPDGAFELAR	R	D	0.95	2.55	0.26	0	1	0	0	2	1317.72
Replete	jgi|Auran1|10068	109040	1	16	17	19	0.0007	0.225	LAQPFFSVDDDAADR	K	T	0.95	3.72	0.523	0	1	0	0	2	1666.77
Replete	jgi|Auran1|10068	109040	1	16	17	19	0.0007	0.225	LFFSGDEVK	R	L	0.95	2.71	0.272	0	1	0	0	2	1041.53
Replete	jgi|Auran1|10068	109040	1	16	17	19	0.0007	0.225	QYNSVYDDPAK	R	L	0.95	2.77	0.436	0	1	0	0	2	1299.59
Replete	jgi|Auran1|10068	109040	1	16	17	19	0.0007	0.225	TMLIGMNELEIAEVDAATGLETR	R	I	0.95	2.37	0.436	0	1	0	0	2	2493.22
Replete	jgi|Auran1|10068	109040	1	16	17	19	0.0007	0.225	TVEQLTGDIAPK	K	A	0.95	3.05	0.292	0	1	0	0	2	1271.69
Replete	jgi|Auran1|10068	109040	1	16	17	19	0.0007	0.225	VFPLFLEGPVR	K	Q	0.95	2.8	0.342	0	1	0	0	2	1273.73
Replete	jgi|Auran1|10068	109040	1	16	17	19	0.0007	0.225	VVQSDTANPLFDAFSR	R	Q	0.95	5.57	0.671	0	2	0	0	2	1766.87
Replete	jgi|Auran1|10068	109040	1	16	17	19	0.0007	0.225	YVEVPELGVR	K	Q	0.95	2.3	0.236	0	1	0	0	2	1160.63
Replete	jgi|Auran1|37129	48966.5	0.998	2	2	2	0.0001	0.129	EFEEAGLDESK	R	H	0.95	2.69	0.474	0	1	0	0	2	1253.55
Replete	jgi|Auran1|37129	48966.5	0.998	2	2	2	0.0001	0.129	HGGSAYGIDFK	K	E	0.95	2.43	0.256	0	1	0	0	2	1151.55
Replete	jgi|Auran1|37129	48966.5	0.998	2	2	2	0.0001	0.129	NAQNILLK	K	N	0.95	2.66	0.211	0	1	0	0	2	913.547	jgi|Auran1|18463
Replete	jgi|Auran1|37129	48966.5	0.998	2	2	2	0.0001	0.129	VGVVDFAGCGVVHMVGGAAAGIGAAILGPR	K	L	0.95	2.92	0.193	0	0	1	0	2	2794.45	jgi|Auran1|18463
Replete	jgi|Auran1|55048	64666.2	1	3	3	3	0.0001	0.0629	ALDTMNYTLIK	R	S	0.95	3.14	0.244	0	1	0	0	2	1298.67
Replete	jgi|Auran1|55048	64666.2	1	3	3	3	0.0001	0.0629	GFGFVCFSSPEEAAK	R	A	0.95	3.83	0.522	0	1	0	0	2	1632.74
Replete	jgi|Auran1|55048	64666.2	1	3	3	3	0.0001	0.0629	SGQSDWTNLYVK	R	N	0.95	3.28	0.425	0	1	0	0	2	1397.67
Replete	jgi|Auran1|28850	58202.4	0.998	2	2	2	0.0001	0.0603	GTPVVVATQMLESMIDAPTPTR	R	A	0.95	3.93	0.478	0	1	0	0	2	2314.18
Replete	jgi|Auran1|28850	58202.4	0.998	2	2	2	0.0001	0.0603	TATDAITAAAR	K	S	0.95	2.81	0.21	0	1	0	0	2	1061.56
Replete	jgi|Auran1|26373	42111.1	1	3	3	3	0.0001	0.117	FPTANSCVSDIVGCAR	R	K	0.95	2.62	0.296	0	1	0	0	2	1753.8
Replete	jgi|Auran1|26373	42111.1	1	3	3	3	0.0001	0.117	LAFGVDVSEDDISCK	R	G	0.95	3.67	0.208	0	1	0	0	2	1654.76
Replete	jgi|Auran1|26373	42111.1	1	3	3	3	0.0001	0.117	NEVGIVGNLGDICAK	R	H	0.95	3.74	0.535	0	1	0	0	2	1558.79
Replete	jgi|Auran1|69679	15354	0.998	2	2	4	0.0002	0.122	PGVFPSLK	R	E	0.95	2.25	0.356	0	1	0	0	1	844.493
Replete	jgi|Auran1|69679	15354	0.998	2	2	4	0.0002	0.122	PGVFPSLKEPNEEMLSK	R	G	0.95	3.2	0.479	0	0	3	0	1	1917.96
Replete	jgi|Auran1|54443	72605.2	0.998	2	2	2	0.0001	0.0805	AGSVAMPAPYLFEPAAAVEGLLEAHGAELK	K	A	0.95	2.58	0.398	0	0	1	0	2	3025.53
Replete	jgi|Auran1|54443	72605.2	0.998	2	2	2	0.0001	0.0805	LTDADGSSPPPLTLVESLQHFVLDK	R	L	0.95	3.12	0.225	0	0	1	0	2	2679.39
Replete	jgi|Auran1|25795	50421.5	1	5	6	6	0.0002	0.166	AGIAAHAEQLVNK	R	V	0.95	3.97	0.498	0	1	0	0	2	1321.72
Replete	jgi|Auran1|25795	50421.5	1	5	6	6	0.0002	0.166	ALAEGEGDGIAK	K	V	0.95	3.11	0.464	0	1	0	0	2	1130.57
Replete	jgi|Auran1|25795	50421.5	1	5	6	6	0.0002	0.166	GFVQVDETMR	R	V	0.95	2.42	0.314	0	1	0	0	2	1181.56
Replete	jgi|Auran1|25795	50421.5	1	5	6	6	0.0002	0.166	LGVELIPEFGAYGGPNTVELGNGK	R	K	0.95	3.05	0.287	0	0	1	0	2	2431.25
Replete	jgi|Auran1|25795	50421.5	1	5	6	6	0.0002	0.166	SQGLSCAVLSGGDVGGTCVNR	R	G	0.95	6.23	0.594	0	1	1	0	2	2093.97
Replete	jgi|Auran1|62132	91038	0.998	2	2	2	0.0001	0.0423	QGTVNILDAATSELSGIGLK	K	A	0.95	5.35	0.633	0	1	0	0	2	1987.07
Replete	jgi|Auran1|62132	91038	0.998	2	2	2	0.0001	0.0423	SEWEEVASYSSWSPLK	R	S	0.95	2.85	0.479	0	1	0	0	2	1884.87
Replete	jgi|Auran1|71789	98004	1	3	4	6	0.0002	0.0538	AIELLDNDQSGLDPDELSEAK	K	L	0.95	6.47	0.666	0	2	2	0	2	2272.08
Replete	jgi|Auran1|71789	98004	1	3	4	6	0.0002	0.0538	ALTGVNVGLPETNLHEK	K	A	0.95	4.38	0.592	0	1	0	0	2	1791.96
Replete	jgi|Auran1|71789	98004	1	3	4	6	0.0002	0.0538	VSSEFFNTAGR	K	S	0.95	3.21	0.337	0	1	0	0	2	1214.58
Replete	jgi|Auran1|71644	55596.6	1	7	7	9	0.0003	0.215	AAGALVGDVCIPER	R	K	0.95	3.37	0.399	0	2	0	0	2	1427.73
Replete	jgi|Auran1|71644	55596.6	1	7	7	9	0.0003	0.215	AFVEYVLSDDGQALLGDYNFEQAPQQVR	K	D	0.95	3.86	0.361	0	0	1	0	2	3172.52
Replete	jgi|Auran1|71644	55596.6	1	7	7	9	0.0003	0.215	ALEAMALAPGHEEWTFESATNK	K	G	0.95	3.92	0.446	0	0	1	0	2	2419.12
Replete	jgi|Auran1|71644	55596.6	1	7	7	9	0.0003	0.215	AYADLEADA	R	-	0.95	1.29	0.219	1	0	0	0	2	938.411
Replete	jgi|Auran1|71644	55596.6	1	7	7	9	0.0003	0.215	GAGQEDYVISAK	K	R	0.95	4.1	0.54	0	2	0	0	2	1237.61
Replete	jgi|Auran1|71644	55596.6	1	7	7	9	0.0003	0.215	GITQYLAAACPDK	K	W	0.95	3.96	0.52	0	1	0	0	2	1407.69
Replete	jgi|Auran1|71644	55596.6	1	7	7	9	0.0003	0.215	NLDGTYQSSTESIAR	K	G	0.95	4.46	0.579	0	1	0	0	2	1641.77
Replete	jgi|Auran1|53834	32152.6	1	3	3	3	0.0001	0.223	ITTELIEIISGAAALE	R	-	0.95	4.04	0.356	0	1	0	0	2	1643.91
Replete	jgi|Auran1|53834	32152.6	1	3	3	3	0.0001	0.223	SIEPFVYEGDDVTLTNYDAEDTVLK	K	G	0.95	4.92	0.583	0	0	1	0	2	2833.33
Replete	jgi|Auran1|53834	32152.6	1	3	3	3	0.0001	0.223	STFEDLEDVSYFPDHSVVVALTSDK	K	G	0.95	3.91	0.59	0	0	1	0	2	2800.32
Replete	jgi|Auran1|30727	22074.3	1	4	5	15	0.0006	0.236	KYEPGSPPYLALQQTLDQANNR	K	F	0.95	5.63	0.543	0	0	6	0	2	2503.26
Replete	jgi|Auran1|30727	22074.3	1	4	5	15	0.0006	0.236	QPGPIQYAQLEDCATSK	K	N	0.95	3.44	0.679	0	2	0	0	2	1905.9
Replete	jgi|Auran1|30727	22074.3	1	4	5	15	0.0006	0.236	YADSDLLCGK	R	D	0.95	3.24	0.598	0	1	0	0	2	1141.52
Replete	jgi|Auran1|30727	22074.3	1	4	5	15	0.0006	0.236	YEPGSPPYLALQQTLDQANNR	K	F	0.95	4.15	0.613	0	3	3	0	2	2375.16
Replete	jgi|Auran1|53803	61162.2	1	4	4	4	0.0002	0.0979	ATFPGLEVIGGNVVTR	K	L	0.95	4.02	0.422	0	1	0	0	2	1629.9
Replete	jgi|Auran1|53803	61162.2	1	4	4	4	0.0002	0.0979	DLPGLLLAASSGK	K	L	0.95	2.33	0.435	0	1	0	0	2	1241.71
Replete	jgi|Auran1|53803	61162.2	1	4	4	4	0.0002	0.0979	LPIVNANYELVSLISR	K	T	0.95	3.2	0.616	0	1	0	0	2	1801.02
Replete	jgi|Auran1|53803	61162.2	1	4	4	4	0.0002	0.0979	PQASAVYNVAR	R	L	0.95	3.72	0.48	0	1	0	0	1	1175.62
Replete	jgi|Auran1|59975	18172.8	0.998	2	2	2	0.0001	0.241	ECEVCIANLEAIDALIDKDEK	K	T	0.95	3.69	0.464	0	0	1	0	2	2448.16
Replete	jgi|Auran1|59975	18172.8	0.998	2	2	2	0.0001	0.241	HCGDLQNEAPNPNLNSR	K	D	0.95	2.8	0.322	0	0	1	0	2	1935.87
Replete	jgi|Auran1|59967	26154.2	0.998	2	2	7	0.0003	0.14	GYEPGLTPPEQWDAIPLVGK	K	L	0.95	4.1	0.662	0	2	0	0	2	2167.11
Replete	jgi|Auran1|59967	26154.2	0.998	2	2	7	0.0003	0.14	LAMLGILSVLSESK	R	V	0.95	5.04	0.524	0	5	0	0	2	1476.83
Replete	jgi|Auran1|59911	17215.2	1	7	8	17	0.0006	0.652	FADENFTLK	K	H	0.95	3.11	0.408	0	2	0	0	2	1084.53
Replete	jgi|Auran1|59911	17215.2	1	7	8	17	0.0006	0.652	GFGYAGSSFHR	K	V	0.95	2.82	0.387	0	1	0	0	2	1185.54
Replete	jgi|Auran1|59911	17215.2	1	7	8	17	0.0006	0.652	GMEVVQAVEAVGSQQGK	K	T	0.95	4.18	0.524	0	4	3	0	2	1732.85
Replete	jgi|Auran1|59911	17215.2	1	7	8	17	0.0006	0.652	HTGAGILSMANAGPGTNGSQFFLCTVK	K	T	0.95	5.38	0.582	0	0	3	0	2	2736.32
Replete	jgi|Auran1|59911	17215.2	1	7	8	17	0.0006	0.652	HVVFGSVTK	K	G	0.95	2.04	0.296	0	1	0	0	2	973.547
Replete	jgi|Auran1|59911	17215.2	1	7	8	17	0.0006	0.652	TSKPVVIAACGQL	K	-	0.95	3.25	0.427	0	2	0	0	2	1343.74
Replete	jgi|Auran1|59911	17215.2	1	7	8	17	0.0006	0.652	VITQFMCQGGDFTNHNGTGGK	R	S	0.95	2.32	0.24	0	0	1	0	2	2285.01
Replete	jgi|Auran1|61510	29172.4	1	3	3	5	0.0002	0.146	IELLNAPNNPK	R	Q	0.95	3.22	0.42	0	2	0	0	2	1222.68
Replete	jgi|Auran1|61510	29172.4	1	3	3	5	0.0002	0.146	LRPIQTLIGTR	K	N	0.95	2.32	0.342	0	2	0	0	2	1267.79
Replete	jgi|Auran1|61510	29172.4	1	3	3	5	0.0002	0.146	VINLAPVEFPCNVHLNEK	R	-	0.95	2.77	0.261	0	0	1	0	2	2093.09
Replete	jgi|Auran1|29424	19528.2	0.998	2	2	3	0.0001	0.225	KPGDFGFDPLQIGGGDDPEMQLR	R	E	0.95	6.48	0.565	0	0	2	0	2	2489.18
Replete	jgi|Auran1|29424	19528.2	0.998	2	2	3	0.0001	0.225	LAMLAFAGIVTQAVLTGK	R	G	0.95	4.83	0.484	0	1	0	0	2	1820.04
Replete	jgi|Auran1|19173	7553	0.998	2	2	2	0.0001	0.318	EGDILCLLEWER	R	E	0.95	3.65	0.434	0	1	0	0	2	1532.74
Replete	jgi|Auran1|19173	7553	0.998	2	2	2	0.0001	0.318	VEFIDDPNR	R	S	0.95	2.92	0.402	0	1	0	0	2	1104.53
Replete	jgi|Auran1|67669	127945	1	6	9	17	0.0006	0.0799	IELLQGPNNNK	R	Q	0.95	4	0.416	0	3	0	0	2	1239.67	jgi|Auran1|63886,jgi|Auran1|71555
Replete	jgi|Auran1|67669	127945	1	6	9	17	0.0006	0.0799	NAPGAESTILVQGGSLR	K	T	0.95	5.48	0.0565	0	2	1	0	2	1669.89
Replete	jgi|Auran1|67669	127945	1	6	9	17	0.0006	0.0799	PLDADLELWHGPDNTPCK	R	M	0.95	3.83	0.491	0	0	1	0	1	2077.97	jgi|Auran1|63886,jgi|Auran1|71555
Replete	jgi|Auran1|67669	127945	1	6	9	17	0.0006	0.0799	SPLVDQVQVVLSTEGR	R	P	0.95	3.5	0.564	0	1	0	0	1	1726.93	jgi|Auran1|63886
Replete	jgi|Auran1|67669	127945	1	6	9	17	0.0006	0.0799	TYPFDPLVNSVEVLLR	R	T	0.95	4.52	0.489	0	4	2	0	2	1862.01	jgi|Auran1|63886,jgi|Auran1|71555
Replete	jgi|Auran1|67669	127945	1	6	9	17	0.0006	0.0799	VYVENGQLRPFSAVIATPR	R	G	0.95	3.9	0.571	0	1	2	0	2	2117.15
Replete	jgi|Auran1|59935	80689.2	1	12	13	21	0.0008	0.265	ADLINNLGTIAK	K	S	0.95	3.71	0.532	0	1	0	0	2	1242.71
Replete	jgi|Auran1|59935	80689.2	1	12	13	21	0.0008	0.265	ANNTLTIVDTGIGMTK	K	A	0.95	3.57	0.486	0	2	0	0	2	1664.85
Replete	jgi|Auran1|59935	80689.2	1	12	13	21	0.0008	0.265	AVETSPFLEK	R	L	0.95	2.31	0.281	0	2	0	0	2	1120.59
Replete	jgi|Auran1|59935	80689.2	1	12	13	21	0.0008	0.265	ELISNASDALDK	R	I	0.95	3.12	0.454	0	1	0	0	2	1275.64
Replete	jgi|Auran1|59935	80689.2	1	12	13	21	0.0008	0.265	GIVDSEDLPLNISR	K	E	0.95	4.61	0.513	0	2	0	0	2	1527.8
Replete	jgi|Auran1|59935	80689.2	1	12	13	21	0.0008	0.265	KPDEVTQEEYAAFYK	R	S	0.95	3.68	0.377	0	0	2	0	2	1817.86
Replete	jgi|Auran1|59935	80689.2	1	12	13	21	0.0008	0.265	NNDDEQHTWVSAAGGSFTVQPDAPEAK	K	R	0.95	5.08	0.593	0	0	1	0	2	2871.28
Replete	jgi|Auran1|59935	80689.2	1	12	13	21	0.0008	0.265	SGEEMTSLDDYIAR	K	M	0.95	4.46	0.606	0	3	0	0	2	1586.7
Replete	jgi|Auran1|59935	80689.2	1	12	13	21	0.0008	0.265	SLTNDWEDHAAVK	K	H	0.95	2.99	0.375	0	1	1	0	2	1485.7
Replete	jgi|Auran1|59935	80689.2	1	12	13	21	0.0008	0.265	TMEINPLNPIVK	K	S	0.95	3.61	0.565	0	3	0	0	2	1384.75
Replete	jgi|Auran1|59935	80689.2	1	12	13	21	0.0008	0.265	VFIMDNCEDLMPEFLTFVK	R	G	0.95	5.57	0.615	0	1	0	0	2	2380.09
Replete	jgi|Auran1|59935	80689.2	1	12	13	21	0.0008	0.265	YQSLTDASVLDAEPNLEIHLIPDK	R	A	0.95	5.74	0.643	0	0	1	0	2	2681.37
Replete	jgi|Auran1|59919	11662.8	0.998	2	2	2	0.0001	0.354	EFYYSESYQK	K	A	0.95	2.54	0.439	0	1	0	0	2	1343.58
Replete	jgi|Auran1|59919	11662.8	0.998	2	2	2	0.0001	0.354	GPGDLVETANGGAEGSAAILLEFASIAQAK	K	E	0.95	3.44	0.527	0	0	1	0	2	2857.46
Replete	jgi|Auran1|59906	25970.1	1	3	3	4	0.0002	0.185	SFDGADAGTATLSLK	K	T	0.95	4.25	0.555	0	1	0	0	2	1453.72
Replete	jgi|Auran1|59906	25970.1	1	3	3	4	0.0002	0.185	SVTSMLSGLGLDADEK	K	T	0.95	4.7	0.587	0	2	0	0	2	1638.79
Replete	jgi|Auran1|59906	25970.1	1	3	3	4	0.0002	0.185	TVLVYDTEDDVLEK	K	S	0.95	4.95	0.57	0	1	0	0	2	1638.81
Replete	jgi|Auran1|20168	32619	1	9	11	19	0.0007	0.47	ADLEALAVK	K	L	0.95	3.09	0.239	0	1	0	0	2	929.531
Replete	jgi|Auran1|20168	32619	1	9	11	19	0.0007	0.47	GLLIEINNGR	R	L	0.95	3.54	0.407	0	1	0	0	2	1098.63
Replete	jgi|Auran1|20168	32619	1	9	11	19	0.0007	0.47	GNEYTIGWLR	R	Q	0.95	3.82	0.421	0	2	0	0	2	1208.61
Replete	jgi|Auran1|20168	32619	1	9	11	19	0.0007	0.47	IPHPVPLDLFDPAGLSK	K	N	0.95	4.52	0.359	0	1	1	0	2	1816
Replete	jgi|Auran1|20168	32619	1	9	11	19	0.0007	0.47	LAMLGLFGFLAESK	R	V	0.95	4.19	0.624	0	3	0	0	2	1512.81	jgi|Auran1|24811
Replete	jgi|Auran1|20168	32619	1	9	11	19	0.0007	0.47	LNPVVGYYDPLGLADADLWGR	K	G	0.95	5.83	0.715	0	2	2	0	2	2304.17
Replete	jgi|Auran1|20168	32619	1	9	11	19	0.0007	0.47	PGAFPSFNSPAAGDEYK	K	I	0.95	3.71	0.0493	0	1	0	0	1	1754.8
Replete	jgi|Auran1|20168	32619	1	9	11	19	0.0007	0.47	SPAELWDQMPEAGK	K	W	0.95	3.99	0.557	0	3	0	0	2	1574.72
Replete	jgi|Auran1|20168	32619	1	9	11	19	0.0007	0.47	VPGSVPALSFIPAYDGDYMAPFAANFHVFN	K	-	0.95	5.4	0.616	0	0	2	0	2	3230.53
Replete	jgi|Auran1|22626	17382.2	1	5	6	11	0.0004	0.338	GDYCIQVGR	R	N	0.95	3.38	0.347	0	1	0	0	2	1067.49
Replete	jgi|Auran1|22626	17382.2	1	5	6	11	0.0004	0.338	GFKLCAAKLYQPSR	K	E	0.95	2.48	0.197	0	0	1	0	2	1638.88
Replete	jgi|Auran1|22626	17382.2	1	5	6	11	0.0004	0.338	KMLGATMPSQSEPGTIR	R	G	0.95	4.03	0.349	0	0	1	0	2	1835.9
Replete	jgi|Auran1|22626	17382.2	1	5	6	11	0.0004	0.338	MLGATMPSQSEPGTIR	K	G	0.95	5.49	0.491	0	5	0	0	2	1707.8
Replete	jgi|Auran1|22626	17382.2	1	5	6	11	0.0004	0.338	TYIMIKPDGVQR	R	G	0.95	3.21	0.473	0	1	2	0	2	1436.76
Replete	jgi|Auran1|38989	50420.9	1	4	4	4	0.0002	0.136	AFQALHYAGAAPPTVADDDAELAALR	R	G	0.95	3.57	0.331	0	0	1	0	2	2654.32
Replete	jgi|Auran1|38989	50420.9	1	4	4	4	0.0002	0.136	FCDLVGDDAGLVAK	R	L	0.95	3.67	0.482	0	1	0	0	2	1479.72
Replete	jgi|Auran1|38989	50420.9	1	4	4	4	0.0002	0.136	LDVLTGLTTLK	K	L	0.95	2.84	0.416	0	1	0	0	2	1173.71
Replete	jgi|Auran1|38989	50420.9	1	4	4	4	0.0002	0.136	LGVDYVVDGATLPR	K	G	0.95	3.12	0.419	0	1	0	0	2	1474.79
Replete	jgi|Auran1|28783	15783	1	3	3	4	0.0002	0.292	DGCLNYVDENDEVLVAGFGR	R	R	0.95	5.1	0.745	0	1	0	0	2	2242.01
Replete	jgi|Auran1|28783	15783	1	3	3	4	0.0002	0.292	GHAVGDIPGVR	R	F	0.95	2.28	0.265	0	1	0	0	2	1077.58
Replete	jgi|Auran1|28783	15783	1	3	3	4	0.0002	0.292	VAGVSLLALYK	K	E	0.95	3.87	0.615	0	2	0	0	2	1133.69
Replete	-70682	604417	0.997	2	2	2	0.0001	0.0078	MGYDYHKQSSLQESCLQLTRVLK	R	Q	0.95	2.39	0.337	0	0	1	0	2	2784.38
Replete	-70682	604417	0.997	2	2	2	0.0001	0.0078	VAMMLCVAEMVLKVADPPK	K	K	0.948	2.21	0.264	0	0	1	0	2	2134.08
Replete	jgi|Auran1|28757	22309	1	4	4	6	0.0002	0.23	HIDFAITSPYGQGRPGR	K	V	0.95	2.7	0.456	0	0	1	0	2	1871.95
Replete	jgi|Auran1|28757	22309	1	4	4	6	0.0002	0.23	LVGEYGLR	K	C	0.95	2.53	0.365	0	1	0	0	2	906.505
Replete	jgi|Auran1|28757	22309	1	4	4	6	0.0002	0.23	MFEAPALLR	R	R	0.95	2.81	0.219	0	1	0	0	2	1063.56
Replete	jgi|Auran1|28757	22309	1	4	4	6	0.0002	0.23	QVVNVPSFLVR	K	L	0.95	2.84	0.395	0	3	0	0	2	1257.73
Replete	jgi|Auran1|38929	17473.8	0.998	2	3	8	0.0003	0.199	DMIIVPEMIGSIVGVYNGK	R	V	0.95	4.98	0.65	0	6	1	0	2	2035.06
Replete	jgi|Auran1|38929	17473.8	0.998	2	3	8	0.0003	0.199	LLDLNHEEFAK	K	L	0.95	3.75	0.45	0	1	0	0	2	1328.69
Replete	jgi|Auran1|54387	28085.2	0.998	2	2	2	0.0001	0.129	AITIFSPDGK	R	L	0.95	2.29	0.322	0	1	0	0	2	1048.57
Replete	jgi|Auran1|54387	28085.2	0.998	2	2	2	0.0001	0.129	RGPDGVQTEQTLPDDVLDAVIAK	K	I	0.95	3.19	0.461	0	0	1	0	2	2437.26
Replete	jgi|Auran1|60091	20699.4	1	3	3	5	0.0002	0.24	FPLEGGLAPLSK	K	V	0.95	3.36	0.306	0	1	0	0	2	1228.69
Replete	jgi|Auran1|60091	20699.4	1	3	3	5	0.0002	0.24	SGEDFTDLQNQELK	K	N	0.95	4.8	0.481	0	2	0	0	2	1623.75
Replete	jgi|Auran1|60091	20699.4	1	3	3	5	0.0002	0.24	STEVGVGPETGGALFDPAGFTK	R	I	0.95	5.49	0.701	0	2	0	0	2	2137.05
Replete	jgi|Auran1|18502	39702.9	1	5	5	7	0.0003	0.231	ANVLDVSQLWK	K	E	0.95	3.95	0.498	0	1	0	0	2	1272.7
Replete	jgi|Auran1|18502	39702.9	1	5	5	7	0.0003	0.231	DIVSEGATDQTLVGCVAMGDAVAAK	K	V	0.95	2.79	0.411	0	0	1	0	2	2478.19
Replete	jgi|Auran1|18502	39702.9	1	5	5	7	0.0003	0.231	ITLLPGDGIGPEITAATVK	K	A	0.95	3.7	0.55	0	2	0	0	2	1866.06
Replete	jgi|Auran1|18502	39702.9	1	5	5	7	0.0003	0.231	SCQAADSILMAAIGGPK	K	W	0.95	5.29	0.524	0	1	0	0	2	1705.83
Replete	jgi|Auran1|18502	39702.9	1	5	5	7	0.0003	0.231	VGQNNMIYSEPEIER	R	I	0.95	4.72	0.497	0	2	0	0	2	1794.83
Replete	jgi|Auran1|61597	503586	1	6	6	8	0.0003	0.0151	AIPLSFTIENEVK	K	D	0.95	2.33	0.26	0	1	0	0	2	1460.8
Replete	jgi|Auran1|61597	503586	1	6	6	8	0.0003	0.0151	AIPLSFTIENEVKDSVDGK	K	L	0.95	2.66	0.279	0	1	0	0	2	2062.07
Replete	jgi|Auran1|61597	503586	1	6	6	8	0.0003	0.0151	ANTRFAPPAPAR	R	P	0.95	1.72	0.338	0	0	2	0	1	1268.69
Replete	jgi|Auran1|61597	503586	1	6	6	8	0.0003	0.0151	DATAVFGATAK	K	Y	0.95	3.41	0.452	0	1	0	0	2	1051.54
Replete	jgi|Auran1|61597	503586	1	6	6	8	0.0003	0.0151	LAGSGTVAPFK	K	V	0.95	2.96	0.503	0	1	0	0	2	1047.58
Replete	jgi|Auran1|61597	503586	1	6	6	8	0.0003	0.0151	VNPADASSAALTAELK	K	S	0.95	5.27	0.639	0	2	0	0	2	1557.81
Replete	jgi|Auran1|25646	19323.8	0.998	2	2	2	0.0001	0.151	DFPIFNSYGWGVSAK	K	A	0.95	4.52	0.607	0	1	0	0	2	1687.81
Replete	jgi|Auran1|25646	19323.8	0.998	2	2	2	0.0001	0.151	EWGTLAIISGGK	K	G	0.95	2.13	0.317	0	1	0	0	2	1231.67
Replete	jgi|Auran1|71657	187400	1	5	5	6	0.0002	0.0373	GDFAAVLAEK	K	N	0.95	3.96	0.353	0	1	0	0	2	1020.54
Replete	jgi|Auran1|71657	187400	1	5	5	6	0.0002	0.0373	IADLKDAVEK	R	G	0.95	3.02	0.272	0	1	0	0	2	1101.62
Replete	jgi|Auran1|71657	187400	1	5	5	6	0.0002	0.0373	NAAIDTKPVDVSTGQGYSNDYDWK	K	R	0.95	6.15	0.545	0	0	1	0	2	2644.22
Replete	jgi|Auran1|71657	187400	1	5	5	6	0.0002	0.0373	NAFDLFNSGAYAQK	K	S	0.95	4.68	0.479	0	2	0	0	2	1545.73
Replete	jgi|Auran1|71657	187400	1	5	5	6	0.0002	0.0373	NIMEAIASK	K	N	0.95	2.01	0.377	0	1	0	0	2	992.509
Replete	- K2C1_HUMAN KERATIN, TYPE II CYTOSKELETAL 1 (CYTOKERATIN 1) (K1) (CK 1) (67 KD CYTOKERATIN) (HAIR ALPHA PROTEIN) gi|186772 (M98776) keratin 1 [Homo sapiens]	66001.3	1	11	13	14	0.0005	0	DYQELMNTK	R	L	0.95	2.41	0.328	0	1	0	0	2	1141.52
Replete	- K2C1_HUMAN KERATIN, TYPE II CYTOSKELETAL 1 (CYTOKERATIN 1) (K1) (CK 1) (67 KD CYTOKERATIN) (HAIR ALPHA PROTEIN) gi|186772 (M98776) keratin 1 [Homo sapiens]	66001.3	1	11	13	14	0.0005	0	FLEQQNQVLQTK	R	W	0.95	4.21	0.0875	0	1	0	0	2	1475.79	gi|547754|,gi|254622|bb
Replete	- K2C1_HUMAN KERATIN, TYPE II CYTOSKELETAL 1 (CYTOKERATIN 1) (K1) (CK 1) (67 KD CYTOKERATIN) (HAIR ALPHA PROTEIN) gi|186772 (M98776) keratin 1 [Homo sapiens]	66001.3	1	11	13	14	0.0005	0	GGGGGGYGSGGSSYGSGGGSYGSGGGGGGGR	R	G	0.95	6.95	0.497	0	1	1	0	2	2383.95
Replete	- K2C1_HUMAN KERATIN, TYPE II CYTOSKELETAL 1 (CYTOKERATIN 1) (K1) (CK 1) (67 KD CYTOKERATIN) (HAIR ALPHA PROTEIN) gi|186772 (M98776) keratin 1 [Homo sapiens]	66001.3	1	11	13	14	0.0005	0	IEISELNR	K	V	0.95	2.4	0.182	0	1	0	0	2	973.532	gi|547754|,gi|254622|bb
Replete	- K2C1_HUMAN KERATIN, TYPE II CYTOSKELETAL 1 (CYTOKERATIN 1) (K1) (CK 1) (67 KD CYTOKERATIN) (HAIR ALPHA PROTEIN) gi|186772 (M98776) keratin 1 [Homo sapiens]	66001.3	1	11	13	14	0.0005	0	LNDLEDALQQAK	K	E	0.95	4.3	0.402	0	1	0	0	2	1357.7
Replete	- K2C1_HUMAN KERATIN, TYPE II CYTOSKELETAL 1 (CYTOKERATIN 1) (K1) (CK 1) (67 KD CYTOKERATIN) (HAIR ALPHA PROTEIN) gi|186772 (M98776) keratin 1 [Homo sapiens]	66001.3	1	11	13	14	0.0005	0	QISNLQQSISDAEQR	K	G	0.95	4.77	0.556	0	1	1	0	2	1716.85
Replete	- K2C1_HUMAN KERATIN, TYPE II CYTOSKELETAL 1 (CYTOKERATIN 1) (K1) (CK 1) (67 KD CYTOKERATIN) (HAIR ALPHA PROTEIN) gi|186772 (M98776) keratin 1 [Homo sapiens]	66001.3	1	11	13	14	0.0005	0	SLDLDSIIAEVK	R	A	0.95	4.07	0.525	0	1	0	0	2	1302.72
Replete	- K2C1_HUMAN KERATIN, TYPE II CYTOSKELETAL 1 (CYTOKERATIN 1) (K1) (CK 1) (67 KD CYTOKERATIN) (HAIR ALPHA PROTEIN) gi|186772 (M98776) keratin 1 [Homo sapiens]	66001.3	1	11	13	14	0.0005	0	SLNNQFASFIDK	K	V	0.95	3.64	0.497	0	1	0	0	2	1383.69
Replete	- K2C1_HUMAN KERATIN, TYPE II CYTOSKELETAL 1 (CYTOKERATIN 1) (K1) (CK 1) (67 KD CYTOKERATIN) (HAIR ALPHA PROTEIN) gi|186772 (M98776) keratin 1 [Homo sapiens]	66001.3	1	11	13	14	0.0005	0	TNAENEFVTIK	R	K	0.95	2.97	0.506	0	1	0	0	2	1265.64
Replete	- K2C1_HUMAN KERATIN, TYPE II CYTOSKELETAL 1 (CYTOKERATIN 1) (K1) (CK 1) (67 KD CYTOKERATIN) (HAIR ALPHA PROTEIN) gi|186772 (M98776) keratin 1 [Homo sapiens]	66001.3	1	11	13	14	0.0005	0	WELLQQVDTSTR	K	T	0.95	3.26	0.418	0	2	0	0	2	1475.75
Replete	- K2C1_HUMAN KERATIN, TYPE II CYTOSKELETAL 1 (CYTOKERATIN 1) (K1) (CK 1) (67 KD CYTOKERATIN) (HAIR ALPHA PROTEIN) gi|186772 (M98776) keratin 1 [Homo sapiens]	66001.3	1	11	13	14	0.0005	0	YEELQITAGR	K	H	0.95	3.02	0.377	0	1	0	0	2	1179.6
Replete	jgi|Auran1|71636	192710	1	3	4	4	0.0002	0.0341	AEVSPILDTLLDAAGPSLLIVPATK	R	Y	0.95	3.78	0.441	0	0	1	0	2	2504.42
Replete	jgi|Auran1|71636	192710	1	3	4	4	0.0002	0.0341	DTVTPDDIAAVVAAWTGVSAAR	R	L	0.95	5.94	0.522	0	1	1	0	2	2186.11
Replete	jgi|Auran1|71636	192710	1	3	4	4	0.0002	0.0341	TLAAEVFDDADALVR	K	F	0.95	4.15	0.486	0	1	0	0	2	1605.81
Replete	jgi|Auran1|59875	21859.5	1	3	4	4	0.0002	0.2	HSVYLPHTAGR	K	Y	0.95	3.28	0.427	0	0	1	0	2	1237.64
Replete	jgi|Auran1|59875	21859.5	1	3	4	4	0.0002	0.2	TIAECLADEVINAAR	K	G	0.95	4.06	0.54	0	1	1	0	2	1645.82
Replete	jgi|Auran1|59875	21859.5	1	3	4	4	0.0002	0.2	VNMALYLLCTGAR	R	E	0.95	4.46	0.549	0	1	0	0	2	1497.76
Replete	jgi|Auran1|61427	109002	0.998	2	2	3	0.0001	0.0371	DAQQAEEIATLHQALADVEAR	R	A	0.95	2.41	0.24	0	0	1	0	2	2279.13
Replete	jgi|Auran1|61427	109002	0.998	2	2	3	0.0001	0.0371	VTVVRGGGAGAGGRETR	R	D	0.95	3.32	0.337	0	0	2	0	2	1599.87
Replete	jgi|Auran1|59843	14334.8	1	3	5	11	0.0004	0.243	AGLQFPVGR	K	L	0.95	3.21	0.203	1	1	0	0	2	944.532
Replete	jgi|Auran1|59843	14334.8	1	3	5	11	0.0004	0.243	ATIAGGGVIPHIHK	K	S	0.95	4.19	0.472	0	2	0	0	2	1370.79
Replete	jgi|Auran1|59843	14334.8	1	3	5	11	0.0004	0.243	GDEELDTLIK	R	A	0.95	3.15	0.435	2	5	0	0	2	1132.57
Replete	jgi|Auran1|59830	24535.3	1	3	3	3	0.0001	0.216	AAVVASLLGVAAALQSHLPHAR	R	P	0.95	2.24	0.259	0	1	0	0	1	2152.24
Replete	jgi|Auran1|59830	24535.3	1	3	3	3	0.0001	0.216	SEETGQINVIYK	K	-	0.95	2.35	0.397	0	1	0	0	2	1380.7
Replete	jgi|Auran1|59830	24535.3	1	3	3	3	0.0001	0.216	SPSMYSSIDLVADK	R	V	0.95	4.16	0.512	0	1	0	0	2	1528.72
Replete	jgi|Auran1|59805	22112.7	0.998	2	2	3	0.0001	0.121	GFSSNLEFDPLGFGK	K	S	0.95	4.31	0.555	0	2	0	0	2	1614.78
Replete	jgi|Auran1|59805	22112.7	0.998	2	2	3	0.0001	0.121	ITFADLGAVK	K	G	0.95	2.47	0.449	0	1	0	0	2	1034.59
Replete	jgi|Auran1|69835	28080.5	1	7	7	11	0.0004	0.44	DNLTLWTSDNAVDVEASNAEGGGQVGDV	R	-	0.95	3.33	0.294	0	0	1	0	2	2833.28
Replete	jgi|Auran1|69835	28080.5	1	7	7	11	0.0004	0.44	IIATQLIPNSVGDEGK	K	V	0.95	4.88	0.651	0	3	0	0	2	1654.9
Replete	jgi|Auran1|69835	28080.5	1	7	7	11	0.0004	0.44	NLLSVAYK	R	N	0.95	2.2	0.222	0	1	0	0	2	907.525
Replete	jgi|Auran1|69835	28080.5	1	7	7	11	0.0004	0.44	QAFDDAIAELDTLSEESYK	K	D	0.95	5.84	0.665	0	1	0	0	2	2144.99
Replete	jgi|Auran1|69835	28080.5	1	7	7	11	0.0004	0.44	SSSDALDAYQEASR	K	I	0.95	3.85	0.541	0	2	0	0	2	1499.66
Replete	jgi|Auran1|69835	28080.5	1	7	7	11	0.0004	0.44	TVAGYSEELSVEER	K	N	0.95	4.16	0.564	0	1	0	0	2	1568.74
Replete	jgi|Auran1|69835	28080.5	1	7	7	11	0.0004	0.44	YLAEFQASEVR	R	N	0.95	2.7	0.337	0	2	0	0	2	1312.65
Replete	jgi|Auran1|71184	57067.4	1	4	4	4	0.0002	0.103	ALDAATVDSYK	R	A	0.95	2.79	0.298	0	1	0	0	2	1153.57
Replete	jgi|Auran1|71184	57067.4	1	4	4	4	0.0002	0.103	FGPYFVEPVVAGLK	R	D	0.95	3.52	0.544	0	1	0	0	2	1522.83
Replete	jgi|Auran1|71184	57067.4	1	4	4	4	0.0002	0.103	LFVGLAGLATDVQTLR	R	N	0.95	2.84	0.445	0	1	0	0	2	1673.96
Replete	jgi|Auran1|71184	57067.4	1	4	4	4	0.0002	0.103	YDAALAAAGILTPK	R	Q	0.95	2.15	0.261	0	1	0	0	2	1374.76
Replete	jgi|Auran1|18463	47729.2	1	3	3	4	0.0002	0.114	NAQNILLK	K	N	0.95	2.66	0.211	0	1	0	0	2	913.547	jgi|Auran1|37129
Replete	jgi|Auran1|18463	47729.2	1	3	3	4	0.0002	0.114	VGVVDFAGCGVVHMVGGAAAGIGAAILGPR	K	I	0.95	2.92	0.193	0	0	1	0	2	2794.45	jgi|Auran1|37129
Replete	jgi|Auran1|18463	47729.2	1	3	3	4	0.0002	0.114	VPQAVEELGLDDLK	R	H	0.95	4.44	0.608	0	2	0	0	2	1525.81
Replete	jgi|Auran1|38843	30137.5	1	6	6	8	0.0003	0.353	ACAGIFPLQNVFVR	K	K	0.95	3.92	0.523	0	1	0	0	2	1591.84
Replete	jgi|Auran1|38843	30137.5	1	6	6	8	0.0003	0.353	LIPEYMGTEIEK	K	A	0.95	2.47	0.567	0	1	0	0	2	1422.72
Replete	jgi|Auran1|38843	30137.5	1	6	6	8	0.0003	0.353	LMELHGDAGNEDSGAAVPR	K	E	0.95	4.05	0.512	0	0	2	0	2	1954.89
Replete	jgi|Auran1|38843	30137.5	1	6	6	8	0.0003	0.353	LVCEDIQGYNCLTNFHGMDMTR	K	D	0.95	3.87	0.499	0	0	2	0	2	2674.15
Replete	jgi|Auran1|38843	30137.5	1	6	6	8	0.0003	0.353	MCYANSAQVR	K	L	0.95	3.46	0.31	0	1	0	0	2	1199.53
Replete	jgi|Auran1|38843	30137.5	1	6	6	8	0.0003	0.353	VFDLSLADLNNDEDQTYR	R	K	0.95	6.08	0.628	0	1	0	0	2	2127.98
Replete	jgi|Auran1|9896	16371.1	0.998	2	2	2	0.0001	0.213	GCVYSYDAIGSFER	K	V	0.95	3.73	0.575	0	1	0	0	2	1623.71
Replete	jgi|Auran1|9896	16371.1	0.998	2	2	2	0.0001	0.213	NMTTTSIAQMLGNTLYYK	K	R	0.95	4.48	0.521	0	1	0	0	2	2050
Replete	jgi|Auran1|23003	70179.8	1	3	3	4	0.0002	0.0755	ESGLDLSGDALAMQR	K	L	0.95	3.51	0.426	0	1	0	0	2	1578.74
Replete	jgi|Auran1|23003	70179.8	1	3	3	4	0.0002	0.0755	IINEPTAAALAYGMDK	R	T	0.95	3.14	0.441	0	2	0	0	2	1693.85
Replete	jgi|Auran1|23003	70179.8	1	3	3	4	0.0002	0.0755	STNGDTMLGGEDFDEELLK	K	H	0.95	2.76	0.425	0	1	0	0	2	2086.91
Replete	jgi|Auran1|72180	104922	0.999	2	2	2	0.0001	0.0307	LPVLVSASEDGTVR	R	I	0.95	2.94	0.35	0	1	0	0	2	1442.79
Replete	jgi|Auran1|72180	104922	0.999	2	2	2	0.0001	0.0307	LVWANNNDIQSASLK	K	G	0.95	3.47	0.412	0	1	0	0	2	1672.87
Replete	jgi|Auran1|25961	16650.9	0.998	2	2	2	0.0001	0.17	AEYTFQYTK	K	V	0.95	2.56	0.429	0	1	0	0	2	1150.54
Replete	jgi|Auran1|25961	16650.9	0.998	2	2	2	0.0001	0.17	LVEAEAASYFVGNGCEK	R	E	0.95	3.36	0.418	0	1	0	0	2	1843.85
Replete	jgi|Auran1|36925	48951.1	0.998	2	2	8	0.0003	0.0874	IGGIGTVPVGR	K	V	0.95	3.64	0.483	0	2	0	0	2	1025.61
Replete	jgi|Auran1|36925	48951.1	0.998	2	2	8	0.0003	0.0874	SGDACMATLAPTKPLCVESFAEYPPLGR	K	F	0.95	4.8	0.603	0	0	6	0	2	3038.44
Replete	jgi|Auran1|64431	139140	1	5	7	15	0.0006	0.0591	ASLACPQACGACCGDSEEFFYGAK	K	K	0.95	5.73	0.608	0	1	1	0	2	2656.06
Replete	jgi|Auran1|64431	139140	1	5	7	15	0.0006	0.0591	CADFLASK	K	K	0.95	2.93	0.38	0	2	0	0	2	911.43
Replete	jgi|Auran1|64431	139140	1	5	7	15	0.0006	0.0591	CGSCFLCR	R	D	0.95	3.01	0.442	0	1	0	0	2	1059.42
Replete	jgi|Auran1|64431	139140	1	5	7	15	0.0006	0.0591	IVAAVESDEFLPELK	K	A	0.95	3.46	0.526	0	2	0	0	2	1659.88
Replete	jgi|Auran1|64431	139140	1	5	7	15	0.0006	0.0591	VSTSLFMTGLSASDVNEDADVR	K	A	0.95	6.27	0.717	0	6	2	0	2	2314.09
Replete	jgi|Auran1|33639	23538.7	1	6	7	10	0.0004	0.452	ELNPIVGFYDPLGLSSASFWGK	K	S	0.95	4.58	0.565	0	1	1	0	2	2397.21
Replete	jgi|Auran1|33639	23538.7	1	6	7	10	0.0004	0.452	ETAIANILPVDLYDPTNVASSMSAEESK	K	K	0.95	4.36	0.453	0	0	2	0	2	2965.44
Replete	jgi|Auran1|33639	23538.7	1	6	7	10	0.0004	0.452	ETAIANILPVDLYDPTNVASSMSAEESKK	K	G	0.95	4.52	0.491	0	0	1	0	2	3093.53
Replete	jgi|Auran1|33639	23538.7	1	6	7	10	0.0004	0.452	GFEESVSSMTPPEQWDAIPVNAK	R	L	0.95	3.01	0.533	0	0	2	0	2	2535.17
Replete	jgi|Auran1|33639	23538.7	1	6	7	10	0.0004	0.452	LAMLGIFGFLTEAK	R	I	0.95	4.32	0.439	0	1	0	0	2	1526.83
Replete	jgi|Auran1|33639	23538.7	1	6	7	10	0.0004	0.452	SEAETIGFLR	K	H	0.95	3.59	0.462	0	2	0	0	2	1122.58
Replete	jgi|Auran1|54227	27729.1	1	3	3	3	0.0001	0.222	AQLAVGNVLPISAIPEGTVICNAEARPGDR	K	G	0.95	3.84	0.445	0	0	1	0	2	3088.62
Replete	jgi|Auran1|54227	27729.1	1	3	3	3	0.0001	0.222	CSGDYAVVVTHDEDHGTTK	R	L	0.95	3.47	0.558	0	0	1	0	2	2090.91
Replete	jgi|Auran1|54227	27729.1	1	3	3	3	0.0001	0.222	VQFQNSYR	K	F	0.95	3.29	0.282	0	1	0	0	2	1041.51
Replete	jgi|Auran1|53694	59694.4	1	8	8	9	0.0003	0.241	AESAYYESLHETPLIANTIAR	K	K	0.95	3.46	0.39	0	0	1	0	2	2349.17
Replete	jgi|Auran1|53694	59694.4	1	8	8	9	0.0003	0.241	AYELADELK	K	E	0.95	2.38	0.212	0	1	0	0	2	1051.53
Replete	jgi|Auran1|53694	59694.4	1	8	8	9	0.0003	0.241	CVVVGCGAQGLNQGLNMR	K	D	0.95	3.69	0.53	0	1	0	0	2	1932.92
Replete	jgi|Auran1|53694	59694.4	1	8	8	9	0.0003	0.241	FNTGSNQVDNQQLNAINAAIR	K	N	0.95	5.02	0.347	0	0	1	0	2	2288.14
Replete	jgi|Auran1|53694	59694.4	1	8	8	9	0.0003	0.241	LIQYGWETITEALK	K	H	0.95	4.28	0.537	0	1	0	0	2	1664.89
Replete	jgi|Auran1|53694	59694.4	1	8	8	9	0.0003	0.241	LNYYNSLSQAEK	R	L	0.95	3.49	0.536	0	1	0	0	2	1429.7
Replete	jgi|Auran1|53694	59694.4	1	8	8	9	0.0003	0.241	SEFDDGIEAIAGK	R	K	0.95	3.42	0.497	0	1	0	0	2	1351.64
Replete	jgi|Auran1|53694	59694.4	1	8	8	9	0.0003	0.241	TPAGPMEIPEQEYFDNAVLMVAEVK	K	A	0.95	3.96	0.384	0	0	2	0	2	2810.33
Replete	jgi|Auran1|63886	31090.2	0.998	2	3	5	0.0002	0.379	GGTNPLGAPYQSFK	R	N	0.95	3.56	0.447	0	2	0	0	2	1436.72
Replete	jgi|Auran1|63886	31090.2	0.998	2	3	5	0.0002	0.379	IELLQGPNNNK	R	Q	0.95	4	0.416	0	3	0	0	2	1239.67	jgi|Auran1|67669,jgi|Auran1|71555
Replete	jgi|Auran1|63886	31090.2	0.998	2	3	5	0.0002	0.379	NPQSDSTILVQGGSLR	K	T	0.95	5.65	0.555	0	2	1	0	2	1671.87
Replete	jgi|Auran1|63886	31090.2	0.998	2	3	5	0.0002	0.379	PLDADLELWHGPDNTPCK	R	M	0.95	3.83	0.491	0	0	1	0	1	2077.97	jgi|Auran1|67669,jgi|Auran1|71555
Replete	jgi|Auran1|63886	31090.2	0.998	2	3	5	0.0002	0.379	SPLVDQVQVVLSTEGR	K	P	0.95	3.5	0.564	0	1	0	0	1	1726.93	jgi|Auran1|67669
Replete	jgi|Auran1|63886	31090.2	0.998	2	3	5	0.0002	0.379	TYPFDPLVNSVEVLLR	R	T	0.95	4.52	0.489	0	4	2	0	2	1862.01	jgi|Auran1|67669,jgi|Auran1|71555
Replete	jgi|Auran1|63886	31090.2	0.998	2	3	5	0.0002	0.379	VYVENGQLRPFSCVIATPR	R	G	0.95	3.37	0.554	0	0	3	0	2	2206.14	jgi|Auran1|71555
Replete	jgi|Auran1|35763	36501.4	0.998	2	2	2	0.0001	0.108	EVFMSQPILLELEAPIK	R	I	0.95	2.99	0.254	0	1	0	0	2	1973.07
Replete	jgi|Auran1|35763	36501.4	0.998	2	2	2	0.0001	0.108	TFTDCFNCLPVAAIVDEK	K	I	0.95	2.9	0.402	0	1	0	0	2	2099.98
Replete	jgi|Auran1|25558	50561.6	0.998	2	2	2	0.0001	0.0911	ADYEGVPTVVFSHPTIGTIGLTEAEALEK	K	Y	0.95	3.72	0.59	0	0	1	0	2	3044.55
Replete	jgi|Auran1|25558	50561.6	0.998	2	2	2	0.0001	0.0911	GALGGTCVNVGCVPK	R	K	0.95	4.37	0.411	0	1	0	0	2	1488.73
Replete	jgi|Auran1|33288	17390.3	1	4	4	8	0.0003	0.29	APGDFEFGATFKPTDEK	R	E	0.95	3.21	0.372	0	0	3	0	2	1856.87
Replete	jgi|Auran1|33288	17390.3	1	4	4	8	0.0003	0.29	APGDFEFGATFKPTDEKELK	R	R	0.95	2.68	0.402	0	0	1	0	2	2227.09
Replete	jgi|Auran1|33288	17390.3	1	4	4	8	0.0003	0.29	VPGEQFQGTYTGWEAHDR	R	L	0.95	5.48	0.604	0	0	2	0	2	2077.94
Replete	jgi|Auran1|33288	17390.3	1	4	4	8	0.0003	0.29	YPGMVPWFR	K	E	0.95	2.75	0.502	0	2	0	0	2	1168.56
Replete	jgi|Auran1|63826	251145	1	4	4	4	0.0002	0.026	ATLDGADAAFVANLEEK	K	L	0.95	4.81	0.537	0	1	0	0	2	1734.86
Replete	jgi|Auran1|63826	251145	1	4	4	4	0.0002	0.026	AVFGLEQADLEDR	R	C	0.95	3.39	0.419	0	1	0	0	2	1462.72
Replete	jgi|Auran1|63826	251145	1	4	4	4	0.0002	0.026	LQNTPGALASVSR	K	L	0.95	2.56	0.289	0	1	0	0	2	1313.72
Replete	jgi|Auran1|63826	251145	1	4	4	4	0.0002	0.026	SALEAMGASGGGIVADEYK	K	E	0.95	3.01	0.341	0	1	0	0	2	1825.86
Replete	jgi|Auran1|71555	62906.3	1	3	3	5	0.0002	0.166	IAQGADSTILVQGGSLR	K	T	0.95	4.84	0.481	0	1	0	0	2	1685.92
Replete	jgi|Auran1|71555	62906.3	1	3	3	5	0.0002	0.166	IELLQGPNNNK	R	Q	0.95	4	0.416	0	3	0	0	2	1239.67	jgi|Auran1|63886,jgi|Auran1|67669
Replete	jgi|Auran1|71555	62906.3	1	3	3	5	0.0002	0.166	NAPGADSTILVQGGSLR	K	T	0.95	4.74	0.563	0	1	0	0	2	1655.87
Replete	jgi|Auran1|71555	62906.3	1	3	3	5	0.0002	0.166	PLDADLELWHGPDNTPCK	R	M	0.95	3.83	0.491	0	0	1	0	1	2077.97	jgi|Auran1|63886,jgi|Auran1|67669
Replete	jgi|Auran1|71555	62906.3	1	3	3	5	0.0002	0.166	TYPFDPLVNSVEVLLR	R	T	0.95	4.52	0.489	0	4	2	0	2	1862.01	jgi|Auran1|63886,jgi|Auran1|67669
Replete	jgi|Auran1|71555	62906.3	1	3	3	5	0.0002	0.166	VYVENGQLRPFSCVIATPR	R	G	0.95	3.37	0.554	0	0	3	0	2	2206.14	jgi|Auran1|63886
Replete	jgi|Auran1|68051	235460	0.998	2	2	2	0.0001	0.0229	GGDAPEPAESPAPPLEVVEAPRAAAR	R	P	0.95	3.05	0.215	0	0	1	0	1	2554.29
Replete	jgi|Auran1|68051	235460	0.998	2	2	2	0.0001	0.0229	NQGRALIAATAAPTDRSWLGALPGAK	R	K	0.95	2.43	0.21	0	0	1	0	2	2606.42
Replete	jgi|Auran1|59795	42649.1	1	8	9	24	0.0009	0.356	AATATLPATVKPGVVTGDALMDLLAYAK	K	E	0.95	5.4	0.653	0	0	7	0	2	2774.5
Replete	jgi|Auran1|59795	42649.1	1	8	9	24	0.0009	0.356	DYLQAQIGNPDGDDKPNKK	R	Y	0.95	4.3	0.541	0	0	1	0	2	2116.03
Replete	jgi|Auran1|59795	42649.1	1	8	9	24	0.0009	0.356	EDIQYAIEAGTIK	R	M	0.95	4.05	0.525	0	2	0	0	2	1450.74
Replete	jgi|Auran1|59795	42649.1	1	8	9	24	0.0009	0.356	EFPDEASVAGCVAGALQVR	K	E	0.95	4.89	0.56	0	4	0	0	2	1975.95
Replete	jgi|Auran1|59795	42649.1	1	8	9	24	0.0009	0.356	GFAIPAVNAVSSCGINACLEAAAK	R	Y	0.95	3.46	0.467	0	0	1	0	2	2391.18
Replete	jgi|Auran1|59795	42649.1	1	8	9	24	0.0009	0.356	LGAAMEDLK	R	C	0.95	3.19	0.363	0	1	0	0	2	947.487
Replete	jgi|Auran1|59795	42649.1	1	8	9	24	0.0009	0.356	LYTQPEEVWQVYEALSK	K	V	0.95	5.57	0.576	0	2	1	0	2	2083.04
Replete	jgi|Auran1|59795	42649.1	1	8	9	24	0.0009	0.356	YGGPMIVQFSR	K	G	0.95	4.18	0.427	0	5	0	0	2	1254.63
Replete	jgi|Auran1|34246	29330.7	1	9	9	12	0.0005	0.464	AGLVFNPATPLDILK	K	Y	0.95	4.09	0.522	0	2	0	0	2	1568.91
Replete	jgi|Auran1|34246	29330.7	1	9	9	12	0.0005	0.464	EVAEAGVDMFVAGSAIFR	K	D	0.95	4.04	0.55	0	1	0	0	2	1884.92
Replete	jgi|Auran1|34246	29330.7	1	9	9	12	0.0005	0.464	HGVTAPIDVHLMVSPVDR	K	I	0.95	3.36	0.369	0	0	1	0	2	1959.01
Replete	jgi|Auran1|34246	29330.7	1	9	9	12	0.0005	0.464	IVGDFADAGASYITFHPEASPHVDR	R	T	0.95	4.1	0.557	0	0	1	0	2	2672.27
Replete	jgi|Auran1|34246	29330.7	1	9	9	12	0.0005	0.464	KLIDASGYDIR	R	L	0.95	2.5	0.266	0	1	0	0	2	1250.67
Replete	jgi|Auran1|34246	29330.7	1	9	9	12	0.0005	0.464	LEIDGGVSGANIK	R	E	0.95	4	0.462	0	2	0	0	2	1272.68
Replete	jgi|Auran1|34246	29330.7	1	9	9	12	0.0005	0.464	LIDASGYDIR	K	L	0.95	3.15	0.414	0	1	0	0	2	1122.58
Replete	jgi|Auran1|34246	29330.7	1	9	9	12	0.0005	0.464	TEEDYKVTIDAMRDELAAAK	R	V	0.95	2.89	0.197	0	0	1	0	2	2285.1
Replete	jgi|Auran1|34246	29330.7	1	9	9	12	0.0005	0.464	VPANLVES	K	-	0.95	1.09	0.431	2	0	0	0	2	828.447
Replete	jgi|Auran1|4272	26750.2	0.998	2	2	2	0.0001	0.116	AYIDIAEVAPIGGGLAK	R	L	0.95	5.18	0.446	0	1	0	0	2	1657.92
Replete	jgi|Auran1|4272	26750.2	0.998	2	2	2	0.0001	0.116	LWVADVEQYDK	K	V	0.95	3.13	0.521	0	1	0	0	2	1365.67
Replete	jgi|Auran1|69930	22433.2	1	5	6	12	0.0005	0.374	GGSFPGNQLNFLGDSK	K	W	0.95	3.31	0.455	0	4	0	0	2	1637.79
Replete	jgi|Auran1|69930	22433.2	1	5	6	12	0.0005	0.374	LAMIGVMGFSAAALVPGSVPLLP	R	-	0.95	2.25	0.417	0	1	0	0	2	2243.22
Replete	jgi|Auran1|69930	22433.2	1	5	6	12	0.0005	0.374	SPLEAWEATPFDGK	K	V	0.95	4.38	0.63	0	3	0	0	2	1547.74
Replete	jgi|Auran1|69930	22433.2	1	5	6	12	0.0005	0.374	TDAQFLNQQNAELNNGR	K	L	0.95	5.95	0.528	0	1	1	0	2	1932.92
Replete	jgi|Auran1|69930	22433.2	1	5	6	12	0.0005	0.374	TSDPLMLWYR	R	A	0.95	2.73	0.548	0	2	0	0	2	1297.63
Replete	jgi|Auran1|60769	120118	0.998	2	2	2	0.0001	0.0242	LVGAWQLGAATVLAR	R	D	0.95	2.88	0.451	0	1	0	0	2	1525.89
Replete	jgi|Auran1|60769	120118	0.998	2	2	2	0.0001	0.0242	WALTEAEGLGAPK	K	H	0.95	4.1	0.444	0	1	0	0	2	1342.7
Replete	jgi|Auran1|70952	123903	0.998	2	2	2	0.0001	0.052	AAAAGAAEDATAQEVDKFATQAEQALEGCR	R	A	0.95	4.2	0.466	0	0	1	0	2	3050.41
Replete	jgi|Auran1|70952	123903	0.998	2	2	2	0.0001	0.052	DLVAGAGGVAGLADAEQLAQQAASDAAEAEAAAK	K	A	0.95	6.9	0.558	0	0	1	0	2	3110.52
Replete	jgi|Auran1|39329	9874	1	3	3	4	0.0002	0.395	LTQDYDALDVANR	R	I	0.95	4.26	0.52	0	2	0	0	2	1493.72
Replete	jgi|Auran1|39329	9874	1	3	3	4	0.0002	0.395	VNTLIRPDGQK	K	K	0.95	3.08	0.316	0	1	0	0	2	1240.7
Replete	jgi|Auran1|39329	9874	1	3	3	4	0.0002	0.395	YPLTTESAMK	K	K	0.95	2.4	0.255	0	1	0	0	2	1156.56
Replete	jgi|Auran1|12244	23912.2	1	3	3	3	0.0001	0.191	LGEGGVPALWDALPEISK	K	W	0.95	3.92	0.605	0	1	0	0	2	1851.99
Replete	jgi|Auran1|12244	23912.2	1	3	3	3	0.0001	0.191	LGIPDLYDPTGGLR	K	N	0.95	2.94	0.43	0	1	0	0	2	1486.79
Replete	jgi|Auran1|12244	23912.2	1	3	3	3	0.0001	0.191	VPGSVPALTK	K	I	0.95	2.06	0.348	0	1	0	0	2	968.578
Replete	jgi|Auran1|70922	356474	1	3	4	7	0.0003	0.0208	AESYVVANDLLAAMTETMASGSMAK	K	M	0.95	5.99	0.588	0	2	2	0	2	2561.19
Replete	jgi|Auran1|70922	356474	1	3	4	7	0.0003	0.0208	WDGLWDPNDPSLVGCVTK	K	L	0.95	4.68	0.62	0	2	0	0	2	2058.96
Replete	jgi|Auran1|70922	356474	1	3	4	7	0.0003	0.0208	YFAPTIEWDWSGPQTGSGSPDDLVK	K	E	0.95	4.08	0.544	0	0	1	0	2	2753.27
Replete	jgi|Auran1|70921	212898	1	4	4	5	0.0002	0.0287	AGDAVLDKEALNSGPVK	K	A	0.95	5.03	0.443	0	0	1	0	2	1683.89
Replete	jgi|Auran1|70921	212898	1	4	4	5	0.0002	0.0287	ATFNALTPVFDEDTQK	R	G	0.95	3.82	0.451	0	1	0	0	2	1796.87
Replete	jgi|Auran1|70921	212898	1	4	4	5	0.0002	0.0287	GILQDLVEAEAAAK	R	F	0.95	4.33	0.559	0	2	0	0	2	1427.77
Replete	jgi|Auran1|70921	212898	1	4	4	5	0.0002	0.0287	GYAVGIVNLQK	K	A	0.95	3.19	0.529	0	1	0	0	2	1161.66
Replete	jgi|Auran1|38757	29552.3	0.998	2	3	4	0.0002	0.168	GVDDEVANVLVAQLLYLANDDPTK	R	D	0.95	3.45	0.252	0	1	1	0	2	2572.32
Replete	jgi|Auran1|38757	29552.3	0.998	2	3	4	0.0002	0.168	IMIHQPLGGAQGQAADIEIQAK	R	E	0.95	5.11	0.455	0	0	2	0	2	2289.2
Replete	-71007	63786	0.998	2	2	2	0.0001	0.0662	LFTDFRIADEELMQESKK	K	L	0.95	1.99	0.329	0	0	1	0	2	2200.1
Replete	-71007	63786	0.998	2	2	2	0.0001	0.0662	MRFVEEDSPLTFPNREAR	R	E	0.95	3.29	0.208	0	0	1	0	2	2194.07
Replete	jgi|Auran1|36266	44163.6	1	3	3	3	0.0001	0.165	GLFEQEVPVDTVFNANEMIDVLGATR	K	G	0.95	4.09	0.555	0	0	1	0	2	2864.41
Replete	jgi|Auran1|36266	44163.6	1	3	3	3	0.0001	0.165	SITPMGGFPHYGEVNEDWIMVK	K	G	0.95	2.43	0.263	0	0	1	0	2	2523.17
Replete	jgi|Auran1|36266	44163.6	1	3	3	3	0.0001	0.165	YSASDGGEKDVDRELER	K	I	0.95	2.39	0.292	0	0	1	0	2	1925.88
Replete	jgi|Auran1|64345	111836	1	3	3	3	0.0001	0.0457	ALGVATFGPSAAAAEIEASK	R	A	0.95	3.1	0.512	0	1	0	0	2	1860.97
Replete	jgi|Auran1|64345	111836	1	3	3	3	0.0001	0.0457	CGDLVAGVADGCAK	R	S	0.95	2.55	0.182	0	1	0	0	2	1392.63
Replete	jgi|Auran1|64345	111836	1	3	3	3	0.0001	0.0457	IYAAPGNGGTASMGGK	K	V	0.95	2.32	0.224	0	1	0	0	2	1467.69
Replete	jgi|Auran1|72073	102306	1	7	7	8	0.0003	0.126	DIWQAVPTLEPTDFEPK	K	K	0.95	2.24	0.344	0	1	0	0	2	1985.99
Replete	jgi|Auran1|72073	102306	1	7	7	8	0.0003	0.126	LAFDPPLVQGEDYILEVR	K	S	0.95	2.26	0.217	0	1	0	0	2	2074.09
Replete	jgi|Auran1|72073	102306	1	7	7	8	0.0003	0.126	LVFDPPLPESAYSIFK	K	A	0.95	3.68	0.52	0	2	0	0	2	1822.96
Replete	jgi|Auran1|72073	102306	1	7	7	8	0.0003	0.126	NLPSPLLLLAVNAGAGLVPVGPTEAK	K	K	0.95	4.14	0.533	0	0	1	0	2	2511.46
Replete	jgi|Auran1|72073	102306	1	7	7	8	0.0003	0.126	SWVPPALVADGATPELR	K	V	0.95	2.66	0.388	0	1	0	0	2	1778.94
Replete	jgi|Auran1|72073	102306	1	7	7	8	0.0003	0.126	TAGQTIYQSGAVK	R	H	0.95	3.86	0.448	0	1	0	0	2	1323.69
Replete	jgi|Auran1|72073	102306	1	7	7	8	0.0003	0.126	VATVYEDPGVQSAK	R	A	0.95	4.16	0.495	0	1	0	0	2	1463.74
Replete	jgi|Auran1|36205	71670.7	1	13	14	17	0.0006	0.318	ATAGDTHLGGEDFDNR	K	M	0.95	3.04	0.449	0	1	1	0	2	1675.73
Replete	jgi|Auran1|36205	71670.7	1	13	14	17	0.0006	0.318	DAGSIAGLNVLR	K	I	0.95	3.3	0.326	0	1	0	0	2	1185.66
Replete	jgi|Auran1|36205	71670.7	1	13	14	17	0.0006	0.318	FEDLNMDYFR	R	K	0.95	3.44	0.392	0	1	0	0	2	1349.58
Replete	jgi|Auran1|36205	71670.7	1	13	14	17	0.0006	0.318	IINEPTAAAIAYGLDK	R	K	0.95	5.22	0.47	0	2	0	0	2	1659.9
Replete	jgi|Auran1|36205	71670.7	1	13	14	17	0.0006	0.318	ITETTSWLDANQMAEKEEYEAK	K	Q	0.95	3.66	0.542	0	0	1	0	2	2603.18
Replete	jgi|Auran1|36205	71670.7	1	13	14	17	0.0006	0.318	LSQDEIDRMVDEAER	R	Y	0.95	3.14	0.448	0	0	1	0	2	1821.83
Replete	jgi|Auran1|36205	71670.7	1	13	14	17	0.0006	0.318	NAVVTVPAYFNDSQR	K	Q	0.95	3.31	0.501	0	1	0	0	2	1680.83
Replete	jgi|Auran1|36205	71670.7	1	13	14	17	0.0006	0.318	NQVAMNAFNTVFDAK	K	R	0.95	4.31	0.538	0	2	0	0	2	1685.8
Replete	jgi|Auran1|36205	71670.7	1	13	14	17	0.0006	0.318	SINPDEAVAYGATVQAAILSGADSSEK	K	L	0.95	4.1	0.528	0	0	2	0	2	2664.3
Replete	jgi|Auran1|36205	71670.7	1	13	14	17	0.0006	0.318	SQTFSTYADNQPGVLIQVFEGER	K	S	0.95	4.48	0.572	0	0	1	0	2	2586.25
Replete	jgi|Auran1|36205	71670.7	1	13	14	17	0.0006	0.318	SQVNEVVLVGGSTR	K	I	0.95	4.57	0.534	0	1	0	0	2	1444.78
Replete	jgi|Auran1|36205	71670.7	1	13	14	17	0.0006	0.318	TTPSYVAFNETER	R	L	0.95	3.22	0.621	0	1	0	0	2	1514.71
Replete	jgi|Auran1|36205	71670.7	1	13	14	17	0.0006	0.318	VEIIANDQGNR	R	T	0.95	3.54	0.447	0	1	0	0	2	1228.63
Replete	jgi|Auran1|72012	142362	1	6	6	7	0.0003	0.0678	AQLVAGINAVADAVK	R	V	0.95	3.34	0.504	0	1	0	0	2	1439.82
Replete	jgi|Auran1|72012	142362	1	6	6	7	0.0003	0.0678	AYGAPEIVNDGVTIAR	R	D	0.95	3.72	0.112	0	1	0	0	2	1645.86
Replete	jgi|Auran1|72012	142362	1	6	6	7	0.0003	0.0678	DIELDDPAMNIGAK	R	L	0.95	3.03	0.221	0	1	0	0	2	1517.72
Replete	jgi|Auran1|72012	142362	1	6	6	7	0.0003	0.0678	GYVSPYFVNDQER	R	Q	0.95	3.35	0.42	0	1	0	0	2	1573.73
Replete	jgi|Auran1|72012	142362	1	6	6	7	0.0003	0.0678	IENVNDLIPLLEACVK	K	T	0.95	5.08	0.569	0	1	0	0	2	1839.99
Replete	jgi|Auran1|72012	142362	1	6	6	7	0.0003	0.0678	MGILPGGGSTLSYLLR	K	K	0.95	3.94	0.5	0	2	0	0	2	1634.89
Replete	jgi|Auran1|24874	31931.5	0.998	2	2	2	0.0001	0.0868	TCEVMLPGGPLEIEWR	R	E	0.95	3.05	0.245	0	1	0	0	2	1902.91
Replete	jgi|Auran1|24874	31931.5	0.998	2	2	2	0.0001	0.0868	VNAEFVDVVDR	K	S	0.95	3.21	0.415	0	1	0	0	2	1262.64
Replete	jgi|Auran1|72519	62137.6	1	4	6	14	0.0005	0.0782	DAVYSPYSVYGK	K	L	0.95	2.34	0.361	0	1	0	0	2	1348.64
Replete	jgi|Auran1|72519	62137.6	1	4	6	14	0.0005	0.0782	FYQDMEEVNLLSK	K	R	0.95	4.58	0.527	0	3	0	0	2	1615.77
Replete	jgi|Auran1|72519	62137.6	1	4	6	14	0.0005	0.0782	GTMNYLAAASGKPEATAAAK	R	K	0.95	3.79	0.523	0	1	4	0	2	1938.96
Replete	jgi|Auran1|72519	62137.6	1	4	6	14	0.0005	0.0782	KFYQDMEEVNLLSK	K	R	0.95	4.38	0.457	0	3	2	0	2	1759.86
Replete	jgi|Auran1|29090	13124.5	0.998	2	2	2	0.0001	0.138	AFLIEEQK	R	I	0.95	2.6	0.261	0	1	0	0	2	977.531
Replete	jgi|Auran1|29090	13124.5	0.998	2	2	2	0.0001	0.138	HLSSFSYK	K	N	0.95	2.31	0.234	0	1	0	0	2	968.484
Replete	jgi|Auran1|69840	23422.9	1	3	3	5	0.0002	0.261	AGDFSWDPLYFTQGAK	K	A	0.95	3.94	0.587	0	1	0	0	2	1802.84
Replete	jgi|Auran1|69840	23422.9	1	3	3	5	0.0002	0.261	FTDLDWNMAEVIIPAK	R	S	0.95	4.52	0.609	0	2	0	0	2	1878.93
Replete	jgi|Auran1|69840	23422.9	1	3	3	5	0.0002	0.261	SMPFLECPAALDGTLPGDVGFDPLR	K	F	0.95	3.18	0.423	0	0	2	0	2	2691.28
Replete	jgi|Auran1|14638	19061.6	0.998	2	2	2	0.0001	0.166	GLFAEINNGR	K	L	0.95	3.42	0.166	0	1	0	0	2	1090.56
Replete	jgi|Auran1|14638	19061.6	0.998	2	2	2	0.0001	0.166	GYVAGCTPQEQWANIPLIGK	K	L	0.95	4.71	0.629	0	1	0	0	2	2202.1
Replete	jgi|Auran1|24811	26926.1	0.998	2	2	2	0.0001	0.201	LAMIGLFGFLAESK	R	V	0.95	4.19	0.624	0	3	0	0	2	1512.81	jgi|Auran1|20168
Replete	jgi|Auran1|24811	26926.1	0.998	2	2	2	0.0001	0.201	NPGELWDQVPTEGK	K	L	0.95	3.77	0.635	0	1	0	0	2	1569.76
Replete	jgi|Auran1|24811	26926.1	0.998	2	2	2	0.0001	0.201	YLNGVFPHPVPLDLFDPAGLTK	K	N	0.95	2.7	0.242	0	0	1	0	2	2410.28
Replete	jgi|Auran1|70840	88397.6	1	3	4	4	0.0002	0.05	APAADVLPYATDDERDAWLLR	R	F	0.95	4.06	0.531	0	0	1	0	2	2358.17
Replete	jgi|Auran1|70840	88397.6	1	3	4	4	0.0002	0.05	FDSFDIGAEDALLDAGGK	K	A	0.95	3.95	0.446	0	1	0	0	2	1840.86
Replete	jgi|Auran1|70840	88397.6	1	3	4	4	0.0002	0.05	LKFDSFDIGAEDALLDAGGK	K	A	0.95	3.67	0.419	0	1	1	0	2	2082.04
Replete	jgi|Auran1|55489	21392.2	1	3	3	6	0.0002	0.287	FSDIPNGGQGIFK	K	V	0.95	3.41	0.426	0	3	0	0	2	1379.7
Replete	jgi|Auran1|55489	21392.2	1	3	3	6	0.0002	0.287	LAMLGIIGNMFAEGQTGQTLGEQIGSGNMIPF	R	-	0.95	4.76	0.668	0	0	1	0	2	3343.6
Replete	jgi|Auran1|55489	21392.2	1	3	3	6	0.0002	0.287	YDGDYNVGFFGAK	K	Y	0.95	4.26	0.672	0	2	0	0	2	1452.64
Replete	jgi|Auran1|67341	177295	0.998	2	2	3	0.0001	0.0165	ASYRAEAAAIRAAATPAQR	R	R	0.95	2.25	0.227	0	2	0	0	2	1945.04
Replete	jgi|Auran1|67341	177295	0.998	2	2	3	0.0001	0.0165	PRFNAFNR	R	Q	0.95	2.31	0.111	1	0	0	0	1	1021.53
Replete	jgi|Auran1|70817	115471	1	7	7	8	0.0003	0.0903	CGGSTQPYHAVIDTPGSSQWVIR	R	C	0.95	3.47	0.372	0	0	1	0	2	2516.2
Replete	jgi|Auran1|70817	115471	1	7	7	8	0.0003	0.0903	DMFYSAPLKDK	K	V	0.95	2.49	0.329	0	1	0	0	2	1314.64
Replete	jgi|Auran1|70817	115471	1	7	7	8	0.0003	0.0903	IMGDADFEFPLVAGVFVPSPEESDK	K	I	0.95	3.39	0.395	0	0	1	0	2	2712.28
Replete	jgi|Auran1|70817	115471	1	7	7	8	0.0003	0.0903	TNIEVLSGPNNQK	K	Q	0.95	4.28	0.514	0	1	0	0	2	1413.73
Replete	jgi|Auran1|70817	115471	1	7	7	8	0.0003	0.0903	VEETNIWGDDK	K	V	0.95	3.36	0.517	0	1	0	0	2	1305.6
Replete	jgi|Auran1|70817	115471	1	7	7	8	0.0003	0.0903	VEETNIWGDDKVADIR	K	I	0.95	3.21	0.367	0	0	2	0	2	1859.91
Replete	jgi|Auran1|70817	115471	1	7	7	8	0.0003	0.0903	VELWIGPIR	R	C	0.95	2.71	0.163	0	1	0	0	2	1082.64
Replete	jgi|Auran1|31983	29612	1	6	6	8	0.0003	0.284	CSSEVATAIR	K	G	0.95	2.68	0.248	0	1	0	0	2	1093.53
Replete	jgi|Auran1|31983	29612	1	6	6	8	0.0003	0.284	EYQIVDYFFPPTAGK	K	L	0.95	4.55	0.642	0	2	0	0	2	1774.87
Replete	jgi|Auran1|31983	29612	1	6	6	8	0.0003	0.284	ILAMAGLEDCYSTTR	K	G	0.95	3.99	0.501	0	1	0	0	2	1700.8
Replete	jgi|Auran1|31983	29612	1	6	6	8	0.0003	0.284	LKDEVMNIKPVQK	K	Q	0.95	3.62	0.307	0	0	1	0	2	1541.87
Replete	jgi|Auran1|31983	29612	1	6	6	8	0.0003	0.284	NPFQEHTDFLSK	K	D	0.95	3.22	0.431	0	1	0	0	2	1462.7
Replete	jgi|Auran1|31983	29612	1	6	6	8	0.0003	0.284	SLEEIFLYSMPIK	K	E	0.95	2.92	0.483	0	2	0	0	2	1569.82
Replete	jgi|Auran1|23622	42934.4	0.998	2	2	2	0.0001	0.0944	IGLVHLEAIAQCQDAK	R	C	0.95	3.53	0.129	0	0	1	0	2	1765.93
Replete	jgi|Auran1|23622	42934.4	0.998	2	2	2	0.0001	0.0944	SIFCEKPIATDLPETIVAINK	K	C	0.95	3.52	0.357	0	0	1	0	2	2359.26
Replete	jgi|Auran1|69937	28726.2	1	3	4	6	0.0002	0.211	ALIPPAAATAVLSTVVSVSDADAMEL	K	-	0.95	2.97	0.57	0	1	3	0	2	2528.32
Replete	jgi|Auran1|69937	28726.2	1	3	4	6	0.0002	0.211	GYETPNDTAPLR	R	A	0.95	3.36	0.538	0	1	0	0	2	1333.64
Replete	jgi|Auran1|69937	28726.2	1	3	4	6	0.0002	0.211	IHYLAPNIYCCGAGTAADTEK	K	T	0.95	4.68	0.554	0	0	1	0	2	2325.06
Replete	jgi|Auran1|30014	63977.2	0.998	2	2	2	0.0001	0.0434	LPTEGADFESR	R	V	0.95	2.72	0.142	0	1	0	0	2	1221.58
Replete	jgi|Auran1|30014	63977.2	0.998	2	2	2	0.0001	0.0434	YVGGGVFCGENDFSR	K	A	0.95	3.66	0.484	0	1	0	0	2	1663.72
Replete	jgi|Auran1|36157	75638.3	1	5	5	5	0.0002	0.112	AGALSNAFVPVLTGTAFK	R	N	0.95	4.13	0.506	0	1	0	0	2	1763.97
Replete	jgi|Auran1|36157	75638.3	1	5	5	5	0.0002	0.112	ASSDAEPFSALAFK	R	I	0.95	2.98	0.437	0	1	0	0	2	1440.7
Replete	jgi|Auran1|36157	75638.3	1	5	5	5	0.0002	0.112	ASVPLANMFQYVSSLR	R	S	0.95	2.1	0.375	0	1	0	0	2	1782.92
Replete	jgi|Auran1|36157	75638.3	1	5	5	5	0.0002	0.112	IYSGTLAAGDSVFNSVK	R	G	0.95	5.07	0.552	0	1	0	0	2	1728.88
Replete	jgi|Auran1|36157	75638.3	1	5	5	5	0.0002	0.112	LASYDFVPPNVEK	K	E	0.95	3.24	0.513	0	1	0	0	2	1478.75
Replete	jgi|Auran1|37496	21628.1	1	3	4	6	0.0002	0.208	AGGECLTFDQLALR	K	A	0.95	4.15	0.483	0	2	0	0	2	1550.76
Replete	jgi|Auran1|37496	21628.1	1	3	4	6	0.0002	0.208	IAVLVGTITDDPR	K	M	0.95	3.9	0.552	0	2	0	0	2	1369.77
Replete	jgi|Auran1|37496	21628.1	1	3	4	6	0.0002	0.208	TNRPPLSLSALAR	R	F	0.95	3.16	0.477	0	1	1	0	2	1395.81
Replete	jgi|Auran1|66715	118569	1	2	2	2	0.0001	0.0257	EVGTPIDANILK	K	Y	0.95	2.01	0.398	0	1	0	0	2	1269.71
Replete	jgi|Auran1|66715	118569	1	2	2	2	0.0001	0.0257	NWLDGAIIGLSSEGASK	K	S	0.95	5.35	0.616	0	1	0	0	2	1717.88
Replete	jgi|Auran1|8613	13037.5	1	4	5	7	0.0003	0.491	AGNLGDSVTLSVDK	K	T	0.95	3.19	0.536	0	2	0	0	2	1375.71
Replete	jgi|Auran1|8613	13037.5	1	4	5	7	0.0003	0.491	DYLHVIATNK	R	T	0.95	2.97	0.467	0	1	0	0	2	1173.63
Replete	jgi|Auran1|8613	13037.5	1	4	5	7	0.0003	0.491	FVIDCWQPVEDSVLDVATFEK	K	F	0.95	4.89	0.659	0	1	1	0	2	2497.2
Replete	jgi|Auran1|8613	13037.5	1	4	5	7	0.0003	0.491	VVVAAELPFAK	K	R	0.95	2.46	0.402	0	2	0	0	2	1143.68
Replete	jgi|Auran1|15117	16039.2	1	3	3	5	0.0002	0.274	APGDVGGVFFR	K	R	0.95	3.41	0.512	0	2	0	0	2	1121.57
Replete	jgi|Auran1|15117	16039.2	1	3	3	5	0.0002	0.274	LTLPGVLSPSEGIK	K	F	0.95	2.82	0.429	0	1	0	0	2	1410.82
Replete	jgi|Auran1|15117	16039.2	1	3	3	5	0.0002	0.274	VAMLATVGYLYNDLK	R	L	0.95	4.75	0.435	0	2	0	0	2	1686.88
Replete	jgi|Auran1|71358	477026	1	5	5	5	0.0002	0.0184	ACDAAVAEYCGAVGAVGGR	R	D	0.95	2.9	0.255	0	1	0	0	2	1853.83
Replete	jgi|Auran1|71358	477026	1	5	5	5	0.0002	0.0184	EQCAAAPGEACDR	R	S	0.95	1.89	0.375	0	1	0	0	2	1434.57
Replete	jgi|Auran1|71358	477026	1	5	5	5	0.0002	0.0184	VCQTTTEDFVK	K	C	0.95	2.6	0.315	0	1	0	0	2	1327.62
Replete	jgi|Auran1|71358	477026	1	5	5	5	0.0002	0.0184	WSGGQCNAPASECK	K	S	0.95	4.23	0.561	0	1	0	0	2	1551.63
Replete	jgi|Auran1|71358	477026	1	5	5	5	0.0002	0.0184	YDAAAAPAFAVVLAEADLTTATAAK	R	F	0.95	3.34	0.391	0	0	1	0	2	2422.25
Replete	jgi|Auran1|22193	13246.2	1	4	4	13	0.0005	0.535	AGLQFPVAR	K	L	0.95	3.14	0.304	0	8	0	0	2	958.548
Replete	jgi|Auran1|22193	13246.2	1	4	4	13	0.0005	0.535	HLQLAVR	R	N	0.95	2.39	0.135	0	2	0	0	2	836.511
Replete	jgi|Auran1|22193	13246.2	1	4	4	13	0.0005	0.535	LLGSVTIASGGVLPNIHAVLLPK	K	K	0.95	4.18	0.361	0	0	2	0	2	2269.37
Replete	jgi|Auran1|22193	13246.2	1	4	4	13	0.0005	0.535	VGVGAGVYMGAVLEYLCAEILELAGNAAR	R	D	0.95	4.97	0.587	0	0	1	0	2	2982.51
Replete	jgi|Auran1|36910	14030.3	0.998	2	2	2	0.0001	0.0984	VCDEVAVVPSK	R	R	0.95	2.83	0.272	0	1	0	0	2	1202.61
Replete	jgi|Auran1|36910	14030.3	0.998	2	2	2	0.0001	0.0984	VCDEVAVVPSKR	R	M	0.95	3.63	0.363	0	0	1	0	2	1358.71
Replete	jgi|Auran1|59574	37201.2	1	6	7	8	0.0003	0.319	CEYFNPLSSVK	K	D	0.95	2.79	0.524	0	1	0	0	2	1343.63
Replete	jgi|Auran1|59574	37201.2	1	6	7	8	0.0003	0.319	EGLLTGISGGGTMYAALETAK	K	N	0.95	4.86	0.679	0	1	0	0	2	2056.03
Replete	jgi|Auran1|59574	37201.2	1	6	7	8	0.0003	0.319	IVLAEPEAAGLLASGTPTPR	K	N	0.95	4.93	0.689	0	2	0	0	2	1963.09
Replete	jgi|Auran1|59574	37201.2	1	6	7	8	0.0003	0.319	LAPEGVEVYAK	K	C	0.95	2.24	0.445	0	1	0	0	2	1175.63
Replete	jgi|Auran1|59574	37201.2	1	6	7	8	0.0003	0.319	VLDDAPMDALMDELFPIPGDAAVATAK	K	A	0.95	3.79	0.565	0	1	1	0	2	2786.36
Replete	jgi|Auran1|59574	37201.2	1	6	7	8	0.0003	0.319	YLSTPLFADIPADMNDDELSIAK	R	S	0.95	3.94	0.53	0	0	1	0	2	2555.22
Replete	jgi|Auran1|55398	27585.1	1	5	6	7	0.0003	0.238	FLEIDDEK	K	K	0.95	2.39	0.148	0	1	0	0	2	1008.49
Replete	jgi|Auran1|55398	27585.1	1	5	6	7	0.0003	0.238	FLEIDDEKK	K	L	0.95	2.5	0.272	0	1	0	0	2	1136.58
Replete	jgi|Auran1|55398	27585.1	1	5	6	7	0.0003	0.238	ISQEVDGEALGEEFAGYVFR	R	I	0.95	5.35	0.587	0	1	1	0	2	2216.05
Replete	jgi|Auran1|55398	27585.1	1	5	6	7	0.0003	0.238	LNIACPSTGAQK	K	F	0.95	3.43	0.444	0	1	0	0	2	1259.64
Replete	jgi|Auran1|55398	27585.1	1	5	6	7	0.0003	0.238	QGDADIEGLTDTPVAVR	K	L	0.95	5.33	0.519	0	2	0	0	2	1756.87
Replete	- 112352 (S43646) cytokeratin 2, CK 2 [human, epidermis, Peptide, 645 aa] [Homo sapiens]	65848.4	1	4	4	4	0.0002	0	AQYEEIAQR	K	S	0.95	2.59	0.379	0	1	0	0	2	1107.54	gi|1346344|,gi|1346346|
Replete	- 112352 (S43646) cytokeratin 2, CK 2 [human, epidermis, Peptide, 645 aa] [Homo sapiens]	65848.4	1	4	4	4	0.0002	0	FLEQQNQVLQTK	R	W	0.95	4.21	0.0875	0	1	0	0	2	1475.79	gi|1346343|
Replete	- 112352 (S43646) cytokeratin 2, CK 2 [human, epidermis, Peptide, 645 aa] [Homo sapiens]	65848.4	1	4	4	4	0.0002	0	IEISELNR	K	V	0.95	2.4	0.182	0	1	0	0	2	973.532	gi|1346343|
Replete	- 112352 (S43646) cytokeratin 2, CK 2 [human, epidermis, Peptide, 645 aa] [Homo sapiens]	65848.4	1	4	4	4	0.0002	0	NLDLDSIIAEVK	R	A	0.95	3.68	0.536	0	1	0	0	2	1329.73	gi|1346344|,gi|1346346|
Replete	- 112352 (S43646) cytokeratin 2, CK 2 [human, epidermis, Peptide, 645 aa] [Homo sapiens]	65848.4	1	4	4	4	0.0002	0	SKEEAEALYHSK	R	Y	0.95	3.37	0.269	0	0	1	0	2	1391.68
Replete	- 112352 (S43646) cytokeratin 2, CK 2 [human, epidermis, Peptide, 645 aa] [Homo sapiens]	65848.4	1	4	4	4	0.0002	0	TSQNSELNNMQDLVEDYKK	R	K	0.95	3.22	0.432	0	0	1	0	2	2256.05
Replete	jgi|Auran1|71305	103205	1	15	19	32	0.0012	0.219	AMGKPVGSSLVEDDFLDTAK	K	A	0.95	3.82	0.549	0	1	3	0	2	2096.02
Replete	jgi|Auran1|71305	103205	1	15	19	32	0.0012	0.219	CDLNVPLKDGVIGDDTR	R	I	0.95	4.01	0.518	0	1	1	0	2	1886.93
Replete	jgi|Auran1|71305	103205	1	15	19	32	0.0012	0.219	DGPEDKFSLGPVSAR	K	M	0.95	3.49	0.333	0	0	1	0	2	1574.78
Replete	jgi|Auran1|71305	103205	1	15	19	32	0.0012	0.219	FLSPSVSGYLLAK	K	E	0.95	3.63	0.363	0	2	0	0	2	1381.77
Replete	jgi|Auran1|71305	103205	1	15	19	32	0.0012	0.219	FSLGPVSAR	K	M	0.95	2.21	0.236	0	1	0	0	2	933.516
Replete	jgi|Auran1|71305	103205	1	15	19	32	0.0012	0.219	FYKEEEKNEAAFVEK	R	L	0.95	4.54	0.415	0	0	1	0	2	1860.9
Replete	jgi|Auran1|71305	103205	1	15	19	32	0.0012	0.219	GCVTIIGGGDSVAAVEK	K	A	0.95	5.22	0.562	0	1	0	0	2	1632.83
Replete	jgi|Auran1|71305	103205	1	15	19	32	0.0012	0.219	GTFAICDTLAELTEK	K	G	0.95	5.19	0.541	0	1	0	0	2	1668.82
Replete	jgi|Auran1|71305	103205	1	15	19	32	0.0012	0.219	ITVLESLINK	K	C	0.95	3.87	0.447	0	2	0	0	2	1129.68
Replete	jgi|Auran1|71305	103205	1	15	19	32	0.0012	0.219	LAAPFDLFVNDAFGTAHR	K	A	0.95	3.47	0.508	0	1	2	0	2	1961.99
Replete	jgi|Auran1|71305	103205	1	15	19	32	0.0012	0.219	MAPDCIGDEVAAMVGSLGEGEAMLLENTR	K	F	0.95	7.3	0.659	0	0	6	0	2	3084.36
Replete	jgi|Auran1|71305	103205	1	15	19	32	0.0012	0.219	PVGSSLVEDDFLDTAK	K	A	0.95	5.02	0.633	0	1	0	0	1	1692.83
Replete	jgi|Auran1|71305	103205	1	15	19	32	0.0012	0.219	SVADMSEADLK	K	G	0.95	2.98	0.517	0	3	0	0	2	1165.54
Replete	jgi|Auran1|71305	103205	1	15	19	32	0.0012	0.219	VIIGGGMTFTFLK	K	A	0.95	4.03	0.55	0	1	0	0	2	1399.77
Replete	jgi|Auran1|71305	103205	1	15	19	32	0.0012	0.219	YLAGAVDEPVRPLAAIVGGSK	K	V	0.95	4.96	0.556	0	1	2	0	2	2083.16
Replete	jgi|Auran1|69741	20886.8	1	5	6	9	0.0003	0.39	ESILLVFANK	R	Q	0.95	2.43	0.462	0	1	0	0	2	1133.66
Replete	jgi|Auran1|69741	20886.8	1	5	6	9	0.0003	0.39	ILMVGLDAAGK	R	T	0.95	3.21	0.329	0	2	0	0	2	1087.62
Replete	jgi|Auran1|69741	20886.8	1	5	6	9	0.0003	0.39	LGEVVTTIPTIGFNVETVEYK	K	N	0.95	3.95	0.625	0	1	1	0	2	2309.23
Replete	jgi|Auran1|69741	20886.8	1	5	6	9	0.0003	0.39	NISFTVWDVGGQDK	K	I	0.95	4.81	0.673	0	2	0	0	2	1565.76
Replete	jgi|Auran1|69741	20886.8	1	5	6	9	0.0003	0.39	QDLPNAMSAAEMTDK	K	L	0.95	4.29	0.549	0	2	0	0	2	1621.72
Replete	jgi|Auran1|29821	11761.3	0.998	2	2	2	0.0001	0.245	EYLHLPAEIVPATLK	R	K	0.95	2.76	0.307	0	0	1	0	2	1693.95
Replete	jgi|Auran1|29821	11761.3	0.998	2	2	2	0.0001	0.245	LEVYSYLFK	R	E	0.95	2.49	0.31	0	1	0	0	2	1161.62
Replete	jgi|Auran1|22269	38372.5	1	6	6	11	0.0004	0.242	ANFVAASVGTYVPGSCASVGAK	K	G	0.95	5.02	0.63	0	1	0	0	2	2113.04
Replete	jgi|Auran1|22269	38372.5	1	6	6	11	0.0004	0.242	ASPAEVADLTVAVLK	K	R	0.95	3.73	0.479	0	3	0	0	2	1483.84
Replete	jgi|Auran1|22269	38372.5	1	6	6	11	0.0004	0.242	ETLFQCDATGAK	K	M	0.95	2.96	0.47	0	1	0	0	2	1340.62
Replete	jgi|Auran1|22269	38372.5	1	6	6	11	0.0004	0.242	GFLASDESAGPWLR	K	A	0.95	3.9	0.544	0	2	0	0	2	1505.74
Replete	jgi|Auran1|22269	38372.5	1	6	6	11	0.0004	0.242	MVDLITGNGMIPGIK	K	L	0.95	4.09	0.439	0	3	0	0	2	1590.82
Replete	jgi|Auran1|22269	38372.5	1	6	6	11	0.0004	0.242	VLVEQFAALK	K	L	0.95	3.02	0.446	0	1	0	0	2	1117.66
Replete	jgi|Auran1|70752	147712	1	6	6	7	0.0003	0.0604	GTSFGAPSANENVLAK	K	M	0.95	2.75	0.352	0	1	0	0	2	1562.78
Replete	jgi|Auran1|70752	147712	1	6	6	7	0.0003	0.0604	ISYGGAQQHFGVTPDVTTMGK	R	V	0.95	3.36	0.38	0	0	1	0	2	2194.06
Replete	jgi|Auran1|70752	147712	1	6	6	7	0.0003	0.0604	LVEGVLAEGK	K	A	0.95	2.76	0.198	0	1	0	0	2	1014.58
Replete	jgi|Auran1|70752	147712	1	6	6	7	0.0003	0.0604	MVIDAVPSVEMVR	K	F	0.95	2.79	0.367	0	1	0	0	2	1477.74
Replete	jgi|Auran1|70752	147712	1	6	6	7	0.0003	0.0604	TVMPGGVSSPVR	K	A	0.95	2.81	0.392	0	2	0	0	2	1202.62
Replete	jgi|Auran1|70752	147712	1	6	6	7	0.0003	0.0604	VIGGGLPVGAYGGK	K	K	0.95	3.22	0.607	0	1	0	0	2	1244.7
Replete	jgi|Auran1|26032	12367.6	1	4	4	5	0.0002	0.418	NLPPQAIGGPVR	R	V	0.95	2.09	0.408	0	1	0	0	2	1218.7
Replete	jgi|Auran1|26032	12367.6	1	4	4	5	0.0002	0.418	NQYVSTSLIK	R	V	0.95	2.51	0.174	0	1	0	0	2	1152.63
Replete	jgi|Auran1|26032	12367.6	1	4	4	5	0.0002	0.418	VEGVQDQNAAQFYLGK	K	R	0.95	5.33	0.532	0	2	0	0	2	1766.87
Replete	jgi|Auran1|26032	12367.6	1	4	4	5	0.0002	0.418	VMLYPSQI	R	-	0.95	1.4	0.203	1	0	0	0	2	950.502
Replete	jgi|Auran1|60533	21113.6	0.998	2	2	3	0.0001	0.163	APGAIVAAGNPAWIER	K	V	0.95	4.13	0.491	0	1	0	0	2	1592.86
Replete	jgi|Auran1|60533	21113.6	0.998	2	2	3	0.0001	0.163	GDVGAAAVAAMPVPAAK	K	V	0.95	2.71	0.331	0	2	0	0	2	1511.79
Replete	jgi|Auran1|38591	15590	1	3	3	5	0.0002	0.292	KQFVLDVIHPDR	R	A	0.95	3.48	0.181	0	0	1	0	2	1466.81
Replete	jgi|Auran1|38591	15590	1	3	3	5	0.0002	0.292	STGFCLIYDSAEAAK	K	K	0.95	4.96	0.56	0	2	0	0	2	1632.76
Replete	jgi|Auran1|38591	15590	1	3	3	5	0.0002	0.292	VADTQLISLFGFR	K	N	0.95	3.78	0.528	0	2	0	0	2	1466.8
Replete	#NAME?	24391.3	1	6	9	40	0.0015	0	IITHPNFNGNTLDNDIMLIK	K	L	0.95	4.83	0.648	0	4	9	0	2	2283.18
Replete	#NAME?	24391.3	1	6	9	40	0.0015	0	LGEHNIDVLEGNEQFINAAK	R	I	0.95	6.29	0.531	0	4	14	0	2	2211.1
Replete	#NAME?	24391.3	1	6	9	40	0.0015	0	LSSPATLNSR	R	-	0.95	2.13	0.433	0	3	0	0	2	1045.56
Replete	#NAME?	24391.3	1	6	9	40	0.0015	0	SSGSSYPSLLQCLK	K	A	0.95	2.95	0.367	0	1	0	0	2	1526.75
Replete	#NAME?	24391.3	1	6	9	40	0.0015	0	VATVSLPR	R	S	0.95	1.34	0.2	1	3	0	0	2	842.51
Replete	#NAME?	24391.3	1	6	9	40	0.0015	0	VCNYVNWIQQTIAAN	K	-	0.95	3.47	0.37	0	1	0	0	2	1793.86
Replete	jgi|Auran1|60527	50153.2	1	3	3	6	0.0002	0.0928	AADLDVSSATAFAEK	K	N	0.95	4.38	0.642	0	1	0	0	2	1495.73
Replete	jgi|Auran1|60527	50153.2	1	3	3	6	0.0002	0.0928	LGIDKPEDAVQMLK	K	D	0.95	3.03	0.328	0	0	2	0	2	1572.83
Replete	jgi|Auran1|60527	50153.2	1	3	3	6	0.0002	0.0928	MPAVDDLTNVNVGSLK	K	W	0.95	4.76	0.614	0	3	0	0	2	1688.85
Replete	jgi|Auran1|31888	37366.8	1	11	11	23	0.0009	0.357	ADTDYIMVATGTGIAPYR	K	S	0.95	5.26	0.617	0	4	0	0	2	1914.93	jgi|Auran1|23206
Replete	jgi|Auran1|31888	37366.8	1	11	11	23	0.0009	0.357	GAVMYFCGLK	K	G	0.95	2.57	0.458	0	3	0	0	2	1145.55	jgi|Auran1|23206
Replete	jgi|Auran1|31888	37366.8	1	11	11	23	0.0009	0.357	GMMPGIQDMLK	K	S	0.95	3.5	0.594	0	4	0	0	2	1268.57	jgi|Auran1|23206
Replete	jgi|Auran1|31888	37366.8	1	11	11	23	0.0009	0.357	IVGPEATGETCHIIFDHQGK	R	M	0.95	2.68	0.455	0	0	2	0	2	2209.07	jgi|Auran1|23206
Replete	jgi|Auran1|31888	37366.8	1	11	11	23	0.0009	0.357	LDYALSR	K	E	0.95	2.46	0.293	0	1	0	0	2	837.447	jgi|Auran1|23206
Replete	jgi|Auran1|31888	37366.8	1	11	11	23	0.0009	0.357	LFTETTPAGEAYK	R	G	0.95	3.44	0.606	0	2	0	0	2	1427.71	jgi|Auran1|23206
Replete	jgi|Auran1|31888	37366.8	1	11	11	23	0.0009	0.357	MYIQDKVEEYADEIFDR	K	L	0.95	5	0.442	0	0	2	0	2	2179.99	jgi|Auran1|23206
Replete	jgi|Auran1|31888	37366.8	1	11	11	23	0.0009	0.357	RLFTETTPAGEAYK	R	G	0.95	3.8	0.524	0	1	0	0	2	1583.81	jgi|Auran1|23206
Replete	jgi|Auran1|31888	37366.8	1	11	11	23	0.0009	0.357	VEEYADEIFDR	K	L	0.95	3.77	0.525	0	1	0	0	2	1385.62	jgi|Auran1|23206
Replete	jgi|Auran1|31888	37366.8	1	11	11	23	0.0009	0.357	VMLMPEEKADTDYIMVATGTGIAPYR	K	S	0.95	2.74	0.357	0	0	1	0	2	2920.38	jgi|Auran1|23206
Replete	jgi|Auran1|31888	37366.8	1	11	11	23	0.0009	0.357	YGDDMTGKTTSLCVR	R	R	0.95	4.87	0.634	0	2	0	0	2	1703.77
Replete	jgi|Auran1|58968	70177.8	1	23	28	63	0.0024	0.459	AFPNLDVIRPADYEETAGAYVASIDK	R	K	0.95	4.28	0.591	0	0	3	0	2	2825.4
Replete	jgi|Auran1|58968	70177.8	1	23	28	63	0.0024	0.459	AFPNLDVIRPADYEETAGAYVASIDKK	R	D	0.95	6.05	0.6	0	0	2	0	2	2953.5
Replete	jgi|Auran1|58968	70177.8	1	23	28	63	0.0024	0.459	AGYEAWEATYDAWK	K	G	0.95	5.05	0.587	0	2	0	0	2	1660.73
Replete	jgi|Auran1|58968	70177.8	1	23	28	63	0.0024	0.459	ALGLPEEK	K	W	0.95	1.8	0.231	0	1	0	0	2	856.478
Replete	jgi|Auran1|58968	70177.8	1	23	28	63	0.0024	0.459	ALYEATEEAK	K	S	0.95	2.13	0.26	0	2	0	0	2	1124.55
Replete	jgi|Auran1|58968	70177.8	1	23	28	63	0.0024	0.459	DGPTALILSR	K	Q	0.95	3.28	0.278	0	4	0	0	2	1042.59
Replete	jgi|Auran1|58968	70177.8	1	23	28	63	0.0024	0.459	ESVLPAACR	K	K	0.95	2.36	0.193	0	1	0	0	2	1002.5
Replete	jgi|Auran1|58968	70177.8	1	23	28	63	0.0024	0.459	FGFSAPGDIVMEELGMTAK	R	N	0.95	4.92	0.592	0	9	6	0	2	1999.95
Replete	jgi|Auran1|58968	70177.8	1	23	28	63	0.0024	0.459	GAYTLVEEK	K	G	0.95	2.3	0.287	0	1	0	0	2	1009.52
Replete	jgi|Auran1|58968	70177.8	1	23	28	63	0.0024	0.459	GDLECIIIATGSEVQHAYNAAK	K	E	0.95	4.52	0.51	0	0	1	0	2	2360.16
Replete	jgi|Auran1|58968	70177.8	1	23	28	63	0.0024	0.459	GGGDFGADFGK	K	S	0.95	3.8	0.579	0	1	0	0	2	1027.45
Replete	jgi|Auran1|58968	70177.8	1	23	28	63	0.0024	0.459	GIDEVAGTNAAHGEAGVAYVDGAR	R	K	0.95	6.77	0.547	0	1	4	0	2	2300.09
Replete	jgi|Auran1|58968	70177.8	1	23	28	63	0.0024	0.459	KALGLPEEK	R	W	0.95	2.2	0.24	0	1	0	0	2	984.573
Replete	jgi|Auran1|58968	70177.8	1	23	28	63	0.0024	0.459	MAEFTQSEDVGAR	K	Y	0.95	4.34	0.551	0	1	0	0	2	1456.64
Replete	jgi|Auran1|58968	70177.8	1	23	28	63	0.0024	0.459	NVYYGIR	R	E	0.95	1.83	0.245	1	1	0	0	2	884.463
Replete	jgi|Auran1|58968	70177.8	1	23	28	63	0.0024	0.459	PADYEETAGAYVASIDKK	R	D	0.95	3.02	0.363	0	0	1	0	1	1927.93
Replete	jgi|Auran1|58968	70177.8	1	23	28	63	0.0024	0.459	PSGATFLVFADYMR	R	A	0.95	5.16	0.62	0	1	0	0	1	1590.76
Replete	jgi|Auran1|58968	70177.8	1	23	28	63	0.0024	0.459	QNLQEIVEVPASVR	R	R	0.95	4.49	0.596	0	3	0	0	2	1581.86
Replete	jgi|Auran1|58968	70177.8	1	23	28	63	0.0024	0.459	SNNNGKPTLIICK	K	T	0.95	2.69	0.343	0	1	2	0	2	1458.77
Replete	jgi|Auran1|58968	70177.8	1	23	28	63	0.0024	0.459	TLQDGIDGVTPSVAELFAAIPESK	K	G	0.95	5.5	0.537	0	2	4	0	2	2458.27
Replete	jgi|Auran1|58968	70177.8	1	23	28	63	0.0024	0.459	VAMEAGVTTMWYK	R	Y	0.95	3.68	0.532	0	4	0	0	2	1502.7
Replete	jgi|Auran1|58968	70177.8	1	23	28	63	0.0024	0.459	VSGSEIINNIADAVPLYISGSADLHGSNK	R	N	0.95	4.68	0.485	0	0	1	0	2	2941.49
Replete	jgi|Auran1|58968	70177.8	1	23	28	63	0.0024	0.459	WFVSDDTYK	K	F	0.95	2.86	0.437	0	2	0	0	2	1160.53
Replete	jgi|Auran1|23855	25312.4	1	4	4	5	0.0002	0.236	AAMFGVAGLVSAWK	R	T	0.95	2.86	0.494	0	1	0	0	2	1423.74
Replete	jgi|Auran1|23855	25312.4	1	4	4	5	0.0002	0.236	SCVGATPLDTWDNVPLYGK	K	Y	0.95	4.78	0.672	0	1	0	0	2	2093
Replete	jgi|Auran1|23855	25312.4	1	4	4	5	0.0002	0.236	TYSLWDPVGSMK	K	K	0.95	2.01	0.261	0	1	0	0	2	1383.66
Replete	jgi|Auran1|23855	25312.4	1	4	4	5	0.0002	0.236	VGEVNFDPVAK	K	T	0.95	3.69	0.472	0	2	0	0	2	1174.61
Replete	jgi|Auran1|37987	49190.5	1	5	6	7	0.0003	0.243	ESDVTAAAIPYDAK	K	L	0.95	4.23	0.543	0	1	0	0	2	1450.71
Replete	jgi|Auran1|37987	49190.5	1	5	6	7	0.0003	0.243	GVDLSQVHYLSGPIAVETAEPGDLLK	K	V	0.95	3.47	0.526	0	0	1	0	2	2708.42
Replete	jgi|Auran1|37987	49190.5	1	5	6	7	0.0003	0.243	LLPAVGPSPLSVNPLFEIGPLEPR	K	Y	0.95	5	0.627	0	1	2	0	2	2512.42
Replete	jgi|Auran1|37987	49190.5	1	5	6	7	0.0003	0.243	LSGIVDVPNAVATLAVPLAIFDR	R	D	0.95	3.94	0.474	0	1	0	0	2	2351.33
Replete	jgi|Auran1|37987	49190.5	1	5	6	7	0.0003	0.243	TLCSCLATRPLACLPEPAGALLGK	K	L	0.95	3.02	0.186	0	0	1	0	2	2569.33
Replete	jgi|Auran1|32029	34738.4	0.998	2	2	2	0.0001	0.134	SGGSVTTANFLCK	K	G	0.95	2.62	0.42	0	1	0	0	2	1341.65
Replete	jgi|Auran1|32029	34738.4	0.998	2	2	2	0.0001	0.134	TTFLFPGQGAQSVGMAAETAAAVPEAAALFAK	K	A	0.95	4.15	0.488	0	0	1	0	2	3139.58
Replete	jgi|Auran1|60080	26389.3	0.999	2	2	3	0.0001	0.101	LFQVEYAIQAVK	R	L	0.95	3.33	0.407	0	1	0	0	2	1408.78
Replete	jgi|Auran1|60080	26389.3	0.999	2	2	3	0.0001	0.101	VTSTLMESSSIEK	R	V	0.95	3.24	0.573	0	2	0	0	2	1427.69
Replete	jgi|Auran1|37911	28471.1	0.998	2	2	2	0.0001	0.0865	LLQVEYAMEAVK	R	Q	0.95	2.86	0.435	0	1	0	0	2	1393.74
Replete	jgi|Auran1|37911	28471.1	0.998	2	2	2	0.0001	0.0865	YVYGAPLQGAR	R	L	0.95	2.75	0.491	0	1	0	0	2	1194.63
Replete	- K1CJ_HUMAN KERATIN, TYPE I CYTOSKELETAL 10 (CYTOKERATIN 10) (K10) (CK 10)	59502.3	1	5	5	5	0.0002	0	ALEESNYELEGK	R	I	0.95	3.45	0.574	0	1	0	0	2	1381.65
Replete	- K1CJ_HUMAN KERATIN, TYPE I CYTOSKELETAL 10 (CYTOKERATIN 10) (K10) (CK 10)	59502.3	1	5	5	5	0.0002	0	ELTTEIDNNIEQISSYK	K	S	0.95	3.84	0.445	0	1	0	0	2	1996.97
Replete	- K1CJ_HUMAN KERATIN, TYPE I CYTOSKELETAL 10 (CYTOKERATIN 10) (K10) (CK 10)	59502.3	1	5	5	5	0.0002	0	LENEIQTYR	R	G	0.95	3.43	0.0739	0	1	0	0	2	1165.59
Replete	- K1CJ_HUMAN KERATIN, TYPE I CYTOSKELETAL 10 (CYTOKERATIN 10) (K10) (CK 10)	59502.3	1	5	5	5	0.0002	0	SKELTTEIDNNIEQISSYK	K	S	0.95	3.1	0.173	0	0	1	0	2	2212.1
Replete	- K1CJ_HUMAN KERATIN, TYPE I CYTOSKELETAL 10 (CYTOKERATIN 10) (K10) (CK 10)	59502.3	1	5	5	5	0.0002	0	SLLEGEGSSGGGGR	R	G	0.95	3.82	0.417	0	1	0	0	2	1262.6
Replete	- K1CI_HUMAN KERATIN, TYPE I CYTOSKELETAL 9 (CYTOKERATIN 9) (K9) (CK 9) gi|2119236|pir||I37984 keratin 9 - human gi|453155 (X75015) keratin 9 [Homo sapiens] gi|545257|bbs|146074 (S69510) cytokeratin 9, CK 9=type I cytokeratin [human, foot sole epidermis,	61970.8	1	5	5	5	0.0002	0	DIENQYETQITQIEHEVSSSGQEVQSSAK	K	E	0.95	7.22	0.676	0	0	1	0	2	3264.51
Replete	- K1CI_HUMAN KERATIN, TYPE I CYTOSKELETAL 9 (CYTOKERATIN 9) (K9) (CK 9) gi|2119236|pir||I37984 keratin 9 - human gi|453155 (X75015) keratin 9 [Homo sapiens] gi|545257|bbs|146074 (S69510) cytokeratin 9, CK 9=type I cytokeratin [human, foot sole epidermis,	61970.8	1	5	5	5	0.0002	0	EIETYHNLLEGGQEDFESSGAGK	K	I	0.95	4.61	0.558	0	0	1	0	2	2510.13
Replete	- K1CI_HUMAN KERATIN, TYPE I CYTOSKELETAL 9 (CYTOKERATIN 9) (K9) (CK 9) gi|2119236|pir||I37984 keratin 9 - human gi|453155 (X75015) keratin 9 [Homo sapiens] gi|545257|bbs|146074 (S69510) cytokeratin 9, CK 9=type I cytokeratin [human, foot sole epidermis,	61970.8	1	5	5	5	0.0002	0	GGGGSFGYSYGGGSGGGFSASSLGGGFGGGSR	R	G	0.95	5.65	0.674	0	0	1	0	2	2705.16
Replete	- K1CI_HUMAN KERATIN, TYPE I CYTOSKELETAL 9 (CYTOKERATIN 9) (K9) (CK 9) gi|2119236|pir||I37984 keratin 9 - human gi|453155 (X75015) keratin 9 [Homo sapiens] gi|545257|bbs|146074 (S69510) cytokeratin 9, CK 9=type I cytokeratin [human, foot sole epidermis,	61970.8	1	5	5	5	0.0002	0	GGSGGSYGGGGSGGGYGGGSGSR	R	G	0.95	4.26	0.432	0	1	0	0	2	1791.73
Replete	- K1CI_HUMAN KERATIN, TYPE I CYTOSKELETAL 9 (CYTOKERATIN 9) (K9) (CK 9) gi|2119236|pir||I37984 keratin 9 - human gi|453155 (X75015) keratin 9 [Homo sapiens] gi|545257|bbs|146074 (S69510) cytokeratin 9, CK 9=type I cytokeratin [human, foot sole epidermis,	61970.8	1	5	5	5	0.0002	0	VQALEEANNDLENK	K	I	0.95	4.97	0.544	0	1	0	0	2	1586.77
Replete	jgi|Auran1|71247	26629.5	1	4	4	4	0.0002	0.192	ESEATNFLEK	K	K	0.95	1.75	0.354	0	1	0	0	2	1167.55
Replete	jgi|Auran1|71247	26629.5	1	4	4	4	0.0002	0.192	FQYGYAMPVASLAK	K	R	0.95	3.58	0.389	0	1	0	0	2	1545.78
Replete	jgi|Auran1|71247	26629.5	1	4	4	4	0.0002	0.192	LVDPSSVTNLYK	R	V	0.95	2.77	0.491	0	1	0	0	2	1335.72
Replete	jgi|Auran1|71247	26629.5	1	4	4	4	0.0002	0.192	VGDICQVYTQR	R	A	0.95	2.85	0.366	0	1	0	0	2	1338.65
Replete	jgi|Auran1|16956	8587.7	0.998	2	2	5	0.0002	0.436	YADDMFEDIGHSNEAR	K	K	0.95	4.17	0.501	0	0	3	0	2	1885.77
Replete	jgi|Auran1|16956	8587.7	0.998	2	2	5	0.0002	0.436	YLEDHPGGSEVICELAGK	K	Y	0.95	4.21	0.406	0	0	2	0	2	1973.93
Replete	jgi|Auran1|25972	7928.6	1	3	3	5	0.0002	0.338	AEEVQNLSDAVR	R	V	0.95	3.16	0.525	0	2	0	0	2	1330.66
Replete	jgi|Auran1|25972	7928.6	1	3	3	5	0.0002	0.338	IEEEFGVELPDER	K	A	0.95	4.35	0.534	0	2	0	0	2	1561.74
Replete	jgi|Auran1|25972	7928.6	1	3	3	5	0.0002	0.338	IEEEFGVELPDERAEEVQNLSDAVR	K	V	0.95	5.63	0.64	0	0	1	0	2	2873.38
Replete	jgi|Auran1|69678	31585.6	1	6	6	8	0.0003	0.288	DSISVPGSGYSLVDVCLEPK	K	T	0.95	4.54	0.635	0	1	0	0	2	2122.04
Replete	jgi|Auran1|69678	31585.6	1	6	6	8	0.0003	0.288	GMTTGYDQAQALAASQTGTDSQGELEGEINK	R	V	0.95	2.69	0.261	0	0	1	0	2	3187.43
Replete	jgi|Auran1|69678	31585.6	1	6	6	8	0.0003	0.288	NQLSYEQVK	R	G	0.95	2.19	0.167	0	1	0	0	2	1108.56
Replete	jgi|Auran1|69678	31585.6	1	6	6	8	0.0003	0.288	TGLFLDPK	R	G	0.95	3.31	0.45	0	2	0	0	2	890.499
Replete	jgi|Auran1|69678	31585.6	1	6	6	8	0.0003	0.288	TWQVEEQVANK	K	K	0.95	4.09	0.474	0	1	0	0	2	1331.66
Replete	jgi|Auran1|69678	31585.6	1	6	6	8	0.0003	0.288	VPFLFTVK	R	E	0.95	2.22	0.314	0	2	0	0	2	950.572
Replete	jgi|Auran1|22183	17832.1	0.998	2	2	3	0.0001	0.145	AVGGEVGSASSLAPK	R	I	0.95	3.78	0.54	0	2	0	0	2	1329.7
Replete	jgi|Auran1|22183	17832.1	0.998	2	2	3	0.0001	0.145	IGPLGLSPK	K	K	0.95	2.64	0.289	0	1	0	0	2	881.546
Replete	jgi|Auran1|69644	52463.9	1	12	12	16	0.0006	0.396	AAGCITTVTECDPICALQASMEGFAVK	K	T	0.95	5.22	0.641	0	0	2	0	2	2900.33
Replete	jgi|Auran1|69644	52463.9	1	12	12	16	0.0006	0.396	AVICGYGDVGK	R	G	0.95	3.18	0.553	0	1	0	0	2	1138.56
Replete	jgi|Auran1|69644	52463.9	1	12	12	16	0.0006	0.396	DGELLFPAINVNDSVTK	K	S	0.95	3.08	0.567	0	3	0	0	2	1831.94
Replete	jgi|Auran1|69644	52463.9	1	12	12	16	0.0006	0.396	DGTLPDPSSTDNAEFK	K	I	0.95	3.63	0.448	0	2	0	0	2	1693.76
Replete	jgi|Auran1|69644	52463.9	1	12	12	16	0.0006	0.396	DNAIVGNIGHFDNEIDMDGLMK	R	V	0.95	5.07	0.485	0	0	1	0	2	2450.1
Replete	jgi|Auran1|69644	52463.9	1	12	12	16	0.0006	0.396	EIELAEYEMPGLMK	R	T	0.95	3.74	0.566	0	1	0	0	2	1684.78
Replete	jgi|Auran1|69644	52463.9	1	12	12	16	0.0006	0.396	GDGPDLIVDDGGDMTLLVHEGFK	K	A	0.95	3.31	0.513	0	0	1	0	2	2416.13
Replete	jgi|Auran1|69644	52463.9	1	12	12	16	0.0006	0.396	GPILLAEGR	K	L	0.95	3.59	0.457	0	1	0	0	2	925.547
Replete	jgi|Auran1|69644	52463.9	1	12	12	16	0.0006	0.396	HSVIDGICR	K	A	0.95	2.45	0.397	0	1	0	0	2	1056.53
Replete	jgi|Auran1|69644	52463.9	1	12	12	16	0.0006	0.396	TLESQLESLDIIITTTGNK	K	G	0.95	4.44	0.543	0	0	1	0	2	2076.11
Replete	jgi|Auran1|69644	52463.9	1	12	12	16	0.0006	0.396	TVEEYGAAQPLK	K	G	0.95	4.1	0.481	0	1	0	0	2	1305.67
Replete	jgi|Auran1|69644	52463.9	1	12	12	16	0.0006	0.396	VADISLADFGR	R	R	0.95	3.41	0.491	0	1	0	0	2	1163.61
Replete	jgi|Auran1|69630	88426.4	1	14	16	21	0.0008	0.261	AAAPCVLFFDELDSIAGQR	R	G	0.95	5.14	0.577	0	2	1	0	2	2080.02
Replete	jgi|Auran1|69630	88426.4	1	14	16	21	0.0008	0.261	AVANECQANFISVK	K	G	0.95	4.06	0.447	0	1	0	0	2	1550.76
Replete	jgi|Auran1|69630	88426.4	1	14	16	21	0.0008	0.261	EDEERLDDVGYDDIGGCR	R	K	0.95	2.96	0.426	0	0	1	0	2	2112.88
Replete	jgi|Auran1|69630	88426.4	1	14	16	21	0.0008	0.261	GVLFYGPPGCGK	R	T	0.95	2.84	0.49	0	1	0	0	2	1251.62	jgi|Auran1|550
Replete	jgi|Auran1|69630	88426.4	1	14	16	21	0.0008	0.261	GVLLYGPPGSGK	R	T	0.95	2.99	0.431	0	1	0	0	2	1144.64
Replete	jgi|Auran1|69630	88426.4	1	14	16	21	0.0008	0.261	IVSQLLTLMDGLK	R	Q	0.95	3.24	0.352	0	1	0	0	2	1430.83
Replete	jgi|Auran1|69630	88426.4	1	14	16	21	0.0008	0.261	LDDDVDPESIAR	K	D	0.95	3.36	0.175	0	1	0	0	2	1344.63
Replete	jgi|Auran1|69630	88426.4	1	14	16	21	0.0008	0.261	LDQLIYIPMPDLESR	R	L	0.95	3.77	0.485	0	2	0	0	2	1802.94
Replete	jgi|Auran1|69630	88426.4	1	14	16	21	0.0008	0.261	LLVDEATNDDNSVIALSTAK	R	M	0.95	5.93	0.698	0	1	0	0	2	2089.07
Replete	jgi|Auran1|69630	88426.4	1	14	16	21	0.0008	0.261	NSPAIIFIDEIDSIAPK	K	R	0.95	4.51	0.567	0	4	1	0	2	1842.99
Replete	jgi|Auran1|69630	88426.4	1	14	16	21	0.0008	0.261	SPISTDVDLDFLAANTEK	K	Y	0.95	4.79	0.668	0	1	0	0	2	1935.96
Replete	jgi|Auran1|69630	88426.4	1	14	16	21	0.0008	0.261	VINQLLTEIDGVGSK	R	K	0.95	3.78	0.624	0	1	0	0	2	1585.88
Replete	jgi|Auran1|69630	88426.4	1	14	16	21	0.0008	0.261	YALGVSNPSSLR	K	E	0.95	3.31	0.486	0	1	0	0	2	1263.67
Replete	jgi|Auran1|69630	88426.4	1	14	16	21	0.0008	0.261	YTGADLTEICQR	K	A	0.95	4.19	0.529	0	1	0	0	2	1426.66
Replete	jgi|Auran1|59430	53471.9	1	13	14	20	0.0008	0.329	AVDALIPIGR	K	G	0.95	3.45	0.413	0	1	0	0	2	1024.62
Replete	jgi|Auran1|59430	53471.9	1	13	14	20	0.0008	0.329	EAYPGDVFYIHSR	R	L	0.95	3.36	0.598	0	2	1	0	2	1553.74
Replete	jgi|Auran1|59430	53471.9	1	13	14	20	0.0008	0.329	ELIIGDR	R	Q	0.95	2.13	0.0954	1	0	0	0	2	815.463
Replete	jgi|Auran1|59430	53471.9	1	13	14	20	0.0008	0.329	FGSDLDPATQQQLNR	K	G	0.95	4.77	0.516	0	2	0	0	2	1689.82
Replete	jgi|Auran1|59430	53471.9	1	13	14	20	0.0008	0.329	GYIDAVDVSAIQDYEK	R	A	0.95	4.6	0.688	0	1	0	0	2	1785.85
Replete	jgi|Auran1|59430	53471.9	1	13	14	20	0.0008	0.329	LDLAQYR	K	E	0.95	2.62	0.315	0	1	0	0	2	878.474
Replete	jgi|Auran1|59430	53471.9	1	13	14	20	0.0008	0.329	TAIAIDTIINQK	K	T	0.95	2.3	0.256	0	1	0	0	2	1300.75
Replete	jgi|Auran1|59430	53471.9	1	13	14	20	0.0008	0.329	TGAIVDVPVGK	R	G	0.95	3.45	0.381	0	1	0	0	2	1055.61
Replete	jgi|Auran1|59430	53471.9	1	13	14	20	0.0008	0.329	TIVGEGFVISDATEAK	K	L	0.95	4.64	0.56	0	2	0	0	2	1636.84
Replete	jgi|Auran1|59430	53471.9	1	13	14	20	0.0008	0.329	TKGDDALMCIYVGVGQK	K	R	0.95	2.45	0.34	0	0	1	0	2	1870.9
Replete	jgi|Auran1|59430	53471.9	1	13	14	20	0.0008	0.329	VVDGLGEPIDGAGPLK	R	D	0.95	4.16	0.462	0	2	0	0	2	1536.83
Replete	jgi|Auran1|59430	53471.9	1	13	14	20	0.0008	0.329	VVDGLGEPIDGAGPLKDVVR	R	G	0.95	3.88	0.472	0	0	2	0	2	2006.09
Replete	jgi|Auran1|59430	53471.9	1	13	14	20	0.0008	0.329	VYGLNSVQAGEMVEFACGLR	R	G	0.95	4.11	0.621	0	2	0	0	2	2216.05
Replete	jgi|Auran1|70645	198620	1	3	3	3	0.0001	0.019	ALITAAEVSR	K	D	0.95	3.16	0.412	0	1	0	0	2	1030.59
Replete	jgi|Auran1|70645	198620	1	3	3	3	0.0001	0.019	SGSTFTANFDSAR	K	K	0.95	3.31	0.46	0	1	0	0	2	1360.61
Replete	jgi|Auran1|70645	198620	1	3	3	3	0.0001	0.019	SIEIEWDDAGSK	K	G	0.95	3.38	0.522	0	1	0	0	2	1349.62
Replete	jgi|Auran1|58899	25261.4	1	4	4	5	0.0002	0.285	LDVAIDGADEVDPDLNLVK	R	G	0.95	6.16	0.566	0	1	0	0	2	2011.02
Replete	jgi|Auran1|58899	25261.4	1	4	4	5	0.0002	0.285	SGELTDIIAVPTSVR	K	T	0.95	3.37	0.441	0	2	0	0	2	1557.85
Replete	jgi|Auran1|58899	25261.4	1	4	4	5	0.0002	0.285	TKEQAEELGIPLTTLDEFSR	R	L	0.95	3.54	0.403	0	0	1	0	2	2277.16
Replete	jgi|Auran1|58899	25261.4	1	4	4	5	0.0002	0.285	VGLGTGSTAAFAVER	K	L	0.95	4.25	0.531	0	1	0	0	2	1435.75
Replete	jgi|Auran1|69058	36808.9	1	3	4	5	0.0002	0.153	ALQNDAEAITAYFDK	K	S	0.95	5.54	0.591	0	1	0	0	2	1669.81
Replete	jgi|Auran1|69058	36808.9	1	3	4	5	0.0002	0.153	EYLGLTQAILDSVPNLSYTAPK	K	A	0.95	4.93	0.618	0	1	1	0	2	2393.26
Replete	jgi|Auran1|69058	36808.9	1	3	4	5	0.0002	0.153	GFSGPVGFYLQMGGDPK	K	K	0.95	2.94	0.499	0	2	0	0	2	1772.83
Replete	jgi|Auran1|69604	28985.5	1	6	8	13	0.0005	0.323	HPGSFDIVTVK	K	D	0.95	2.01	0.338	0	1	0	0	2	1199.64
Replete	jgi|Auran1|69604	28985.5	1	6	8	13	0.0005	0.323	LGNVFVIGKDDDLDVTLPK	R	G	0.95	5.11	0.57	0	1	2	0	2	2058.11
Replete	jgi|Auran1|69604	28985.5	1	6	8	13	0.0005	0.323	TDPTYPAGFMDVISMDASGDQFR	R	L	0.95	5.11	0.678	0	1	2	0	2	2521.1
Replete	jgi|Auran1|69604	28985.5	1	6	8	13	0.0005	0.323	VGTIMTVEK	R	H	0.95	2.75	0.312	0	1	0	0	2	977.534
Replete	jgi|Auran1|69604	28985.5	1	6	8	13	0.0005	0.323	VNAVYVTAK	R	K	0.95	2.2	0.229	0	1	0	0	2	964.547
Replete	jgi|Auran1|69604	28985.5	1	6	8	13	0.0005	0.323	YPDPSVAVHDTVK	R	L	0.95	3.66	0.462	0	0	4	0	2	1427.72
Replete	jgi|Auran1|24010	18470.4	1	3	3	5	0.0002	0.238	DGPEAFVR	K	R	0.95	2.31	0.182	0	2	0	0	2	890.437
Replete	jgi|Auran1|24010	18470.4	1	3	3	5	0.0002	0.238	FSDVPNGFK	K	G	0.95	2.32	0.289	0	1	0	0	2	1010.49
Replete	jgi|Auran1|24010	18470.4	1	3	3	5	0.0002	0.238	VSMAAITGVLVHNADIEFPGYLSK	R	S	0.95	6.55	0.63	0	0	2	0	2	2532.32
Replete	jgi|Auran1|28296	14536.4	1	5	5	7	0.0003	0.389	ASLTDFQR	R	F	0.95	2.97	0.346	0	1	0	0	2	937.474
Replete	jgi|Auran1|28296	14536.4	1	5	5	7	0.0003	0.389	AWDEADVLAK	K	W	0.95	3.01	0.233	0	1	0	0	2	1117.55
Replete	jgi|Auran1|28296	14536.4	1	5	5	7	0.0003	0.389	LATIIDIVDGNK	K	C	0.95	3.91	0.566	0	2	0	0	2	1271.72
Replete	jgi|Auran1|28296	14536.4	1	5	5	7	0.0003	0.389	VALTDIVVK	R	I	0.95	2.57	0.401	0	1	0	0	2	957.599
Replete	jgi|Auran1|28296	14536.4	1	5	5	7	0.0003	0.389	VVLINYGPDEGK	R	L	0.95	3.45	0.615	0	2	0	0	2	1303.69
Replete	jgi|Auran1|60414	85325.9	1	4	5	5	0.0002	0.107	AATLGDVYEGGDAGPAIDVGPTEAGLSGEALR	R	T	0.95	6.49	0.594	0	0	1	0	2	3029.47
Replete	jgi|Auran1|60414	85325.9	1	4	5	5	0.0002	0.107	CDYSLLTLASER	R	Q	0.95	3.4	0.553	0	1	0	0	2	1427.68
Replete	jgi|Auran1|60414	85325.9	1	4	5	5	0.0002	0.107	LIADFGNVDDNGAPLADR	K	V	0.95	4.99	0.533	0	1	0	0	2	1872.91
Replete	jgi|Auran1|60414	85325.9	1	4	5	5	0.0002	0.107	QQAGGDDAEALAAVIDAVNGLAAK	R	R	0.95	5.73	0.559	0	1	1	0	2	2268.15
Replete	jgi|Auran1|38325	18159.4	1	3	3	3	0.0001	0.164	MGDYVDIK	K	C	0.95	2.11	0.188	0	1	0	0	2	940.445
Replete	jgi|Auran1|38325	18159.4	1	3	3	3	0.0001	0.164	MSTYLTTYK	K	M	0.95	2.61	0.366	0	1	0	0	2	1123.53
Replete	jgi|Auran1|38325	18159.4	1	3	3	3	0.0001	0.164	TGVIYNVTK	R	R	0.95	2.63	0.311	0	1	0	0	2	994.557
Replete	jgi|Auran1|38422	23002.2	1	2	2	3	0.0001	0.15	ALVPDGIQAPTGYFDPMGIADK	K	V	0.95	4.19	0.559	0	1	0	0	2	2292.12
Replete	jgi|Auran1|38422	23002.2	1	2	2	3	0.0001	0.15	LTGTTAGVLEAK	R	Y	0.95	3.52	0.478	0	2	0	0	2	1160.65
Replete	jgi|Auran1|60165	12059.6	1	3	3	4	0.0002	0.378	LVIIANNTPPLR	K	K	0.95	2.85	0.443	0	2	0	0	2	1320.8
Replete	jgi|Auran1|60165	12059.6	1	3	3	4	0.0002	0.378	SEVEYYAMLSK	K	C	0.95	3.66	0.558	0	1	0	0	2	1319.62
Replete	jgi|Auran1|60165	12059.6	1	3	3	4	0.0002	0.378	YFNCSMLAVIDQGDSDIVK	K	E	0.95	5.43	0.61	0	1	0	0	2	2175.01
Replete	jgi|Auran1|37826	51472.6	1	6	7	7	0.0003	0.196	DHSLDYSANFCR	R	M	0.95	2.3	0.408	0	1	0	0	2	1484.62
Replete	jgi|Auran1|37826	51472.6	1	6	7	7	0.0003	0.196	GIGALSQVFWDR	R	A	0.95	3.55	0.521	0	1	0	0	2	1348.7
Replete	jgi|Auran1|37826	51472.6	1	6	7	7	0.0003	0.196	GPAGDGEPTPEALTWLLLTGEVPTK	K	E	0.95	5.43	0.676	0	1	1	0	2	2549.31
Replete	jgi|Auran1|37826	51472.6	1	6	7	7	0.0003	0.196	GYTIPECQEILPTFK	R	G	0.95	3.38	0.46	0	1	0	0	2	1795.89
Replete	jgi|Auran1|37826	51472.6	1	6	7	7	0.0003	0.196	NTYFDGSITR	R	D	0.95	2.38	0.298	0	1	0	0	2	1173.55
Replete	jgi|Auran1|37826	51472.6	1	6	7	7	0.0003	0.196	SQYWDSTYEDVIDVIAK	K	L	0.95	4.79	0.58	0	1	0	0	2	2031.96
Replete	jgi|Auran1|71195	89355.1	1	5	5	5	0.0002	0.109	ALDAPNVEGDGVVLVHPTCGPTQPGDIPGDVR	R	Y	0.95	4.83	0.562	0	0	1	0	2	3252.6
Replete	jgi|Auran1|71195	89355.1	1	5	5	5	0.0002	0.109	GGEDIPEWFAFK	R	R	0.95	3.2	0.404	0	1	0	0	2	1395.66
Replete	jgi|Auran1|71195	89355.1	1	5	5	5	0.0002	0.109	GYVTAEEAKEENLTALK	K	L	0.95	2.55	0.312	0	0	1	0	2	1865.95
Replete	jgi|Auran1|71195	89355.1	1	5	5	5	0.0002	0.109	QGNLPVATMEVTSK	K	F	0.95	2.96	0.488	0	1	0	0	2	1490.75
Replete	jgi|Auran1|71195	89355.1	1	5	5	5	0.0002	0.109	TYEVLKEETANPR	K	T	0.95	3.1	0.448	0	0	1	0	2	1549.79
Replete	jgi|Auran1|19845	35974.2	1	3	3	4	0.0002	0.14	KLSNGGMMDIAKVYPLDAVFDTPDDVPDDIK	R	A	0.95	2.85	0.274	0	0	2	0	2	3411.63
Replete	jgi|Auran1|19845	35974.2	1	3	3	4	0.0002	0.14	VYPLDAVFDTPDDVPDDIK	K	A	0.95	3.98	0.562	0	1	0	0	2	2134.02
Replete	jgi|Auran1|19845	35974.2	1	3	3	4	0.0002	0.14	YAGLESFTISEVAESIAK	R	D	0.95	4.28	0.521	0	1	0	0	2	1914.97
Replete	jgi|Auran1|58667	18138.4	0.998	2	2	2	0.0001	0.229	TMIPEEADEEEEAQEIPLPNVK	K	S	0.95	3.28	0.203	0	0	1	0	2	2527.18
Replete	jgi|Auran1|58667	18138.4	0.998	2	2	2	0.0001	0.229	YAEEPMSEIEKPLK	R	S	0.95	2.94	0.27	0	0	1	0	2	1663.83
Replete	jgi|Auran1|24591	48261.9	1	8	10	14	0.0005	0.276	DIIADIDQALAK	K	A	0.95	3.69	0.451	0	1	0	0	2	1285.7
Replete	jgi|Auran1|24591	48261.9	1	8	10	14	0.0005	0.276	FIDSLDLISHVANVGDAR	K	T	0.95	5.21	0.591	0	1	1	0	2	1942
Replete	jgi|Auran1|24591	48261.9	1	8	10	14	0.0005	0.276	FVDAEDPENFAK	R	A	0.95	3.41	0.478	0	1	0	0	2	1381.63
Replete	jgi|Auran1|24591	48261.9	1	8	10	14	0.0005	0.276	LMNPTTHVLESR	R	Y	0.95	2.65	0.337	0	1	0	0	2	1413.72
Replete	jgi|Auran1|24591	48261.9	1	8	10	14	0.0005	0.276	TTPYQFVDTQHAADLFALAK	R	L	0.95	4.75	0.565	0	1	0	0	2	2237.12
Replete	jgi|Auran1|24591	48261.9	1	8	10	14	0.0005	0.276	WGAGNHPLFDEPDMSYGGDAGLR	K	W	0.95	5.97	0.612	0	1	3	0	2	2478.08
Replete	jgi|Auran1|24591	48261.9	1	8	10	14	0.0005	0.276	WGHDLPEGLAPLAYK	R	L	0.95	3.07	0.134	0	1	0	0	2	1666.86
Replete	jgi|Auran1|24591	48261.9	1	8	10	14	0.0005	0.276	YPGLVDDPQYQK	R	A	0.95	3.83	0.531	0	3	0	0	2	1422.69
Replete	jgi|Auran1|34777	13777	0.998	2	3	4	0.0002	0.187	QLEELKNELAQLR	K	V	0.95	3.53	0.246	0	0	1	0	2	1583.88
Replete	jgi|Auran1|34777	13777	0.998	2	3	4	0.0002	0.187	VLTVYNQTQK	R	G	0.95	3.08	0.496	1	2	0	0	2	1193.65
Replete	jgi|Auran1|71132	88157.4	0.998	2	2	2	0.0001	0.0438	NAEYEMLTEQVVAESTDGK	K	Y	0.95	3.41	0.43	0	1	0	0	2	2129.96
Replete	jgi|Auran1|71132	88157.4	0.998	2	2	2	0.0001	0.0438	VTGLGPDGDETEAVESK	R	A	0.95	4.02	0.612	0	1	0	0	2	1703.8
Replete	jgi|Auran1|60394	14573.9	1	3	3	5	0.0002	0.275	ELAPTNEDWYFVR	K	A	0.95	3.57	0.531	0	2	0	0	2	1639.78
Replete	jgi|Auran1|60394	14573.9	1	3	3	5	0.0002	0.275	SVLQQLEETK	R	V	0.95	3.4	0.488	0	2	0	0	2	1174.63
Replete	jgi|Auran1|60394	14573.9	1	3	3	5	0.0002	0.275	VYLKPGIGIGALR	K	K	0.95	2.99	0.467	0	1	0	0	2	1356.84
Replete	jgi|Auran1|19438	11393.7	1	7	12	59	0.0022	0.583	DNIQGITKPAIR	R	R	0.95	3.04	0.41	1	7	7	0	2	1325.75
Replete	jgi|Auran1|19438	11393.7	1	7	12	59	0.0022	0.583	DSVTYTEHAR	R	R	0.95	2.96	0.199	0	1	0	0	2	1178.54
Replete	jgi|Auran1|19438	11393.7	1	7	12	59	0.0022	0.583	ISGLIYEETR	R	G	0.95	3.91	0.571	4	18	0	0	2	1180.62
Replete	jgi|Auran1|19438	11393.7	1	7	12	59	0.0022	0.583	RISGLIYEETR	K	G	0.95	3.4	0.496	0	2	1	0	2	1336.72
Replete	jgi|Auran1|19438	11393.7	1	7	12	59	0.0022	0.583	TLYGFGG	R	-	0.95	1.82	0.638	7	0	0	0	2	714.346
Replete	jgi|Auran1|19438	11393.7	1	7	12	59	0.0022	0.583	TVTAMDVVYALK	K	R	0.95	3.79	0.54	0	2	0	0	2	1310.7
Replete	jgi|Auran1|19438	11393.7	1	7	12	59	0.0022	0.583	VFLENVIR	K	D	0.95	2.43	0.337	3	6	0	0	2	989.578
Replete	jgi|Auran1|59335	70119.8	0.998	2	2	2	0.0001	0.0548	IINEPTAAALAYGLHDLASDENNPK	R	Q	0.95	2.84	0.492	0	0	1	0	2	2637.32
Replete	jgi|Auran1|59335	70119.8	0.998	2	2	2	0.0001	0.0548	NALEEAAFAAK	R	A	0.95	2.24	0.347	0	1	0	0	2	1134.58
Replete	jgi|Auran1|22124	12649.6	1	5	10	55	0.0021	0.322	GMSIMNSFINDIFER	K	I	0.95	5.39	0.595	0	17	1	0	2	1789.83
Replete	jgi|Auran1|22124	12649.6	1	5	10	55	0.0021	0.322	KGMSIMNSFINDIFER	K	I	0.95	4.75	0.431	0	3	5	0	2	1933.92
Replete	jgi|Auran1|22124	12649.6	1	5	10	55	0.0021	0.322	LMLPGELSK	R	H	0.95	3.01	0.365	3	10	0	0	2	987.555
Replete	jgi|Auran1|22124	12649.6	1	5	10	55	0.0021	0.322	TRVESYSTYIYR	K	V	0.95	4.28	0.498	0	4	4	0	2	1537.77
Replete	jgi|Auran1|22124	12649.6	1	5	10	55	0.0021	0.322	VESYSTYIYR	R	V	0.95	3.32	0.516	2	6	0	0	2	1280.62
Replete	jgi|Auran1|60366	20606.6	1	7	11	19	0.0007	0.408	FLPHIEQNAADNTAPSPEAK	K	-	0.95	4.95	0.577	0	2	4	0	2	2150.05
Replete	jgi|Auran1|60366	20606.6	1	7	11	19	0.0007	0.408	FSAAVPGISAEDLDTLEVAPMR	K	G	0.95	5.23	0.549	0	3	1	0	2	2305.14
Replete	jgi|Auran1|60366	20606.6	1	7	11	19	0.0007	0.408	GFDDEILK	R	E	0.95	2.31	0.245	0	1	0	0	2	936.468
Replete	jgi|Auran1|60366	20606.6	1	7	11	19	0.0007	0.408	GFDDEILKEPNVYR	R	T	0.95	3.75	0.464	0	1	2	0	2	1694.84
Replete	jgi|Auran1|60366	20606.6	1	7	11	19	0.0007	0.408	RVVLTFNGK	R	F	0.95	2.32	0.29	0	1	0	0	2	1033.62
Replete	jgi|Auran1|60366	20606.6	1	7	11	19	0.0007	0.408	TYEAITHYGNAIK	R	L	0.95	4.41	0.603	0	2	1	0	2	1480.74
Replete	jgi|Auran1|60366	20606.6	1	7	11	19	0.0007	0.408	VVLTFNGK	R	F	0.95	1.56	0.266	1	0	0	0	2	877.515
Replete	jgi|Auran1|32244	20330.2	0.998	2	2	2	0.0001	0.198	NIVCVPGCQTPTELYTAYTLGAPLQK	R	V	0.95	2.17	0.325	0	0	1	0	2	2894.44
Replete	jgi|Auran1|32244	20330.2	0.998	2	2	2	0.0001	0.198	VFPGVAGAVTWVK	K	A	0.95	2.34	0.377	0	1	0	0	2	1330.75
Replete	jgi|Auran1|39490	40305	0.998	2	2	2	0.0001	0.0782	IESILMSLPETAR	R	W	0.95	3.18	0.333	0	1	0	0	2	1459.78
Replete	jgi|Auran1|39490	40305	0.998	2	2	2	0.0001	0.0782	ITSAVEELDGEGTFK	K	Q	0.95	4.35	0.631	0	1	0	0	2	1595.78
Replete	jgi|Auran1|12112	36901.1	0.998	2	2	2	0.0001	0.158	AALPAIAALGGMVTPMAVYAAAQGFLPVAAR	K	S	0.95	3.17	0.378	0	0	1	0	2	3001.6
Replete	jgi|Auran1|12112	36901.1	0.998	2	2	2	0.0001	0.158	LAPLSTFGIMPLFALANTGIPLMGVMK	R	G	0.95	3.25	0.351	0	0	1	0	2	2851.52
Replete	jgi|Auran1|14720	19387.6	0.998	2	2	3	0.0001	0.124	ALQGWAFPENR	R	A	0.95	2.91	0.336	0	2	0	0	2	1288.64
Replete	jgi|Auran1|14720	19387.6	0.998	2	2	3	0.0001	0.124	GPAIDHLTQVR	K	K	0.95	3.52	0.463	0	1	0	0	2	1206.66
Replete	jgi|Auran1|60343	27133	1	4	5	12	0.0005	0.257	AAMAGIFGLISASK	R	V	0.95	3.74	0.484	0	2	0	0	2	1352.72
Replete	jgi|Auran1|60343	27133	1	4	5	12	0.0005	0.257	GYVAGCTPQEQWDNIPLYGK	K	L	0.95	4.92	0.58	0	2	2	0	2	2296.07
Replete	jgi|Auran1|60343	27133	1	4	5	12	0.0005	0.257	VPGSVPFLANIEGFPK	K	Y	0.95	3.93	0.671	0	3	0	0	2	1671.91
Replete	jgi|Auran1|60343	27133	1	4	5	12	0.0005	0.257	YTGDVMVPFSNDFSLF	K	-	0.95	4.22	0.617	0	3	0	0	2	1854.83
Replete	jgi|Auran1|58776	50278.9	1	4	4	4	0.0002	0.101	DFAAAVENPATLTK	K	-	0.95	3.9	0.516	0	1	0	0	2	1447.74
Replete	jgi|Auran1|58776	50278.9	1	4	4	4	0.0002	0.101	NADQLSLADLSAEWK	R	S	0.95	4.2	0.527	0	1	0	0	2	1660.82
Replete	jgi|Auran1|58776	50278.9	1	4	4	4	0.0002	0.101	NMEATLAVPVFR	K	V	0.95	2.72	0.271	0	1	0	0	2	1363.7
Replete	jgi|Auran1|58776	50278.9	1	4	4	4	0.0002	0.101	TDAFDALYQK	R	L	0.95	2.35	0.425	0	1	0	0	2	1171.56
Replete	jgi|Auran1|24196	47378.1	1	6	6	8	0.0003	0.219	AIEEDACNALLLK	R	V	0.95	3.27	0.335	0	2	0	0	2	1459.75
Replete	jgi|Auran1|24196	47378.1	1	6	6	8	0.0003	0.219	ANLGANAILGVSLAAAK	K	A	0.95	3.63	0.446	0	2	0	0	2	1553.9
Replete	jgi|Auran1|24196	47378.1	1	6	6	8	0.0003	0.219	ATVQSVGDDITVTNPSR	R	I	0.95	4.87	0.479	0	1	0	0	2	1759.88
Replete	jgi|Auran1|24196	47378.1	1	6	6	8	0.0003	0.219	IESELGDDAVYAGK	R	T	0.95	4.79	0.542	0	1	0	0	2	1466.7
Replete	jgi|Auran1|24196	47378.1	1	6	6	8	0.0003	0.219	VDGEDCYDLGTFYPADERDDPK	K	L	0.95	4.63	0.518	0	0	1	0	2	2577.07
Replete	jgi|Auran1|24196	47378.1	1	6	6	8	0.0003	0.219	VNQIGSVSESIDAVK	K	M	0.95	4.55	0.562	0	1	0	0	2	1545.81
Replete	jgi|Auran1|28593	30695	0.998	2	2	4	0.0002	0.108	GEGGGAPLPPPKPTPSNC	K	-	0.95	3.19	0.479	0	2	0	0	2	1732.83
Replete	jgi|Auran1|28593	30695	0.998	2	2	4	0.0002	0.108	STMGPYIASQTVK	R	K	0.95	2.99	0.33	0	2	0	0	2	1398.69
Replete	jgi|Auran1|31415	46973	1	4	4	4	0.0002	0.165	AMLVGDAAGYVTK	R	C	0.95	3.63	0.558	0	1	0	0	2	1295.67
Replete	jgi|Auran1|31415	46973	1	4	4	4	0.0002	0.165	VAVVGGGPSGACAAEICAQEPNIETYIIER	R	K	0.95	5.13	0.585	0	0	1	0	2	3131.51
Replete	jgi|Auran1|31415	46973	1	4	4	4	0.0002	0.165	VFYTNNAAR	K	E	0.95	2.8	0.331	0	1	0	0	2	1055.53
Replete	jgi|Auran1|31415	46973	1	4	4	4	0.0002	0.165	YDHVGVGTGTVINRPGIK	K	M	0.95	3.32	0.389	0	0	1	0	2	1883.01
Replete	jgi|Auran1|32656	14397.7	1	2	2	2	0.0001	0.146	IDINNANIR	K	V	0.95	3.01	0.206	0	1	0	0	2	1042.56
Replete	jgi|Auran1|32656	14397.7	1	2	2	2	0.0001	0.146	LPGMYPGAAGK	K	I	0.95	3.21	0.478	0	1	0	0	2	1077.54
Replete	jgi|Auran1|33813	9200	1	5	7	17	0.0006	0.64	EALDSYLAGGR	K	K	0.95	3.3	0.484	0	1	0	0	2	1151.57
Replete	jgi|Auran1|33813	9200	1	5	7	17	0.0006	0.64	ESSVVTQVTNGK	K	N	0.95	3.97	0.534	0	6	0	0	2	1248.64	jgi|Auran1|23725
Replete	jgi|Auran1|33813	9200	1	5	7	17	0.0006	0.64	KESSVVTQVTNGK	R	N	0.95	2.38	0.279	0	1	0	0	2	1376.74	jgi|Auran1|23725
Replete	jgi|Auran1|33813	9200	1	5	7	17	0.0006	0.64	LSDEEIGDVAAYVIDQANGDKWDE	R	-	0.95	7.3	0.669	0	2	5	0	2	2652.2	jgi|Auran1|23725
Replete	jgi|Auran1|33813	9200	1	5	7	17	0.0006	0.64	NAMPAFGGR	K	L	0.95	1.81	0.143	1	1	0	0	2	920.441	jgi|Auran1|23725
Replete	jgi|Auran1|21483	19170.7	1	5	6	7	0.0003	0.293	CPFTGNVSIR	K	G	0.95	3.12	0.334	0	1	0	0	2	1150.57
Replete	jgi|Auran1|21483	19170.7	1	5	6	7	0.0003	0.293	EGDIVTVGQCR	K	P	0.95	3.09	0.414	0	1	0	0	1	1233.59
Replete	jgi|Auran1|21483	19170.7	1	5	6	7	0.0003	0.293	FNVLTHEPAVNQSLNVK	R	K	0.95	4.32	0.521	0	1	2	0	2	1910.01
Replete	jgi|Auran1|21483	19170.7	1	5	6	7	0.0003	0.293	LALEGSYVDK	K	K	0.95	2.39	0.274	0	1	0	0	2	1094.57
Replete	jgi|Auran1|21483	19170.7	1	5	6	7	0.0003	0.293	LALEGSYVDKK	K	C	0.95	2.77	0.472	0	0	1	0	2	1222.67
Replete	jgi|Auran1|28128	26323.5	1	3	4	9	0.0003	0.225	AAMMGLFGLLSESSVPGSVPFLSK	R	I	0.95	5.41	0.655	0	3	2	0	2	2457.24
Replete	jgi|Auran1|28128	26323.5	1	3	4	9	0.0003	0.225	GGQPGYYPDIK	K	G	0.95	2.77	0.482	0	2	0	0	2	1194.58
Replete	jgi|Auran1|28128	26323.5	1	3	4	9	0.0003	0.225	GYVAGVTPQEQWDNIPLLAK	R	L	0.95	4.4	0.706	0	2	0	0	2	2199.15
Replete	jgi|Auran1|65882	156080	1	3	3	3	0.0001	0.0314	DTDELISYGFPVFSYSTTPR	R	Q	0.95	5.12	0.556	0	1	0	0	2	2295.08
Replete	jgi|Auran1|65882	156080	1	3	3	3	0.0001	0.0314	EVIEEIVKEELTK	R	N	0.95	3.73	0.324	0	1	0	0	2	1558.86
Replete	jgi|Auran1|65882	156080	1	3	3	3	0.0001	0.0314	QLGIGGLVTDGSVR	K	D	0.95	3.56	0.502	0	1	0	0	2	1371.76
Replete	jgi|Auran1|37768	34652.3	1	10	11	16	0.0006	0.476	DGTAMLWDLNEGKR	K	L	0.95	2.25	0.205	0	0	1	0	2	1605.77
Replete	jgi|Auran1|37768	34652.3	1	10	11	16	0.0006	0.476	DVLSVAFSTDNR	K	Q	0.95	3.43	0.554	0	2	0	0	2	1323.65
Replete	jgi|Auran1|37768	34652.3	1	10	11	16	0.0006	0.476	FSPSVQAPVIVSCGWDK	R	L	0.95	4.4	0.579	0	2	0	0	2	1876.93
Replete	jgi|Auran1|37768	34652.3	1	10	11	16	0.0006	0.476	GHSDWVTSIATTSEDPSMILSSSR	K	D	0.95	6.1	0.628	0	0	3	0	2	2564.19
Replete	jgi|Auran1|37768	34652.3	1	10	11	16	0.0006	0.476	IWDLESK	K	V	0.95	2.16	0.183	0	1	0	0	2	890.462
Replete	jgi|Auran1|37768	34652.3	1	10	11	16	0.0006	0.476	LWELATGK	R	T	0.95	2.69	0.252	0	1	0	0	2	917.51
Replete	jgi|Auran1|37768	34652.3	1	10	11	16	0.0006	0.476	LWNTLGECK	K	Y	0.95	3.23	0.394	0	1	0	0	2	1120.55
Replete	jgi|Auran1|37768	34652.3	1	10	11	16	0.0006	0.476	LYSLDAGDVIHSLVFSPNR	R	Y	0.95	4.73	0.606	0	1	1	0	2	2103.09
Replete	jgi|Auran1|37768	34652.3	1	10	11	16	0.0006	0.476	TNLYGHNGYLNTVTVSPDGSLCASGGK	R	D	0.95	4.42	0.449	0	0	1	0	2	2782.31
Replete	jgi|Auran1|37768	34652.3	1	10	11	16	0.0006	0.476	VVVDELKPEFPAMGK	K	N	0.95	2.92	0.432	0	0	2	0	2	1658.88
Replete	jgi|Auran1|52193	26655.3	1	8	8	13	0.0005	0.349	AANSIYVPPEGK	K	L	0.95	2.33	0.372	0	1	0	0	2	1245.65
Replete	jgi|Auran1|52193	26655.3	1	8	8	13	0.0005	0.349	EAANFLWPVK	R	L	0.95	2.51	0.339	0	1	0	0	2	1174.63
Replete	jgi|Auran1|52193	26655.3	1	8	8	13	0.0005	0.349	LLHYNEGGDAGYR	K	G	0.95	3.57	0.4	0	0	1	0	2	1464.69
Replete	jgi|Auran1|52193	26655.3	1	8	8	13	0.0005	0.349	LLHYNEGGDAGYRGEK	K	I	0.95	1.76	0.3	0	0	1	0	2	1778.85
Replete	jgi|Auran1|52193	26655.3	1	8	8	13	0.0005	0.349	LVEPYIAYGEPNLK	R	S	0.95	4.2	0.533	0	3	0	0	2	1605.85
Replete	jgi|Auran1|52193	26655.3	1	8	8	13	0.0005	0.349	RTQAAIATEQEAAATK	R	A	0.95	3.75	0.475	0	1	0	0	2	1659.87
Replete	jgi|Auran1|52193	26655.3	1	8	8	13	0.0005	0.349	TQAAIATEQEAAATK	R	A	0.95	6.14	0.541	0	2	0	0	2	1503.77
Replete	jgi|Auran1|52193	26655.3	1	8	8	13	0.0005	0.349	VPIDNNAVVEDVLGK	R	Y	0.95	4.93	0.621	0	3	0	0	2	1581.85
Replete	jgi|Auran1|55034	28628.7	0.998	2	2	2	0.0001	0.124	AHQLYVLEPTGVCLR	K	Y	0.95	3.1	0.3	0	1	0	0	2	1755.92
Replete	jgi|Auran1|55034	28628.7	0.998	2	2	2	0.0001	0.124	KELEEDDDDDDDDEMAS	K	-	0.95	4.43	0.589	0	1	0	0	2	2001.69
Replete	jgi|Auran1|59038	26380.1	1	6	6	6	0.0002	0.432	DMGMDTVLIGHSER	K	R	0.95	2.16	0.223	0	0	1	0	2	1592.71
Replete	jgi|Auran1|59038	26380.1	1	6	6	6	0.0002	0.432	DWIAGAVDQKTADEIR	R	I	0.95	2.23	0.318	0	1	0	0	2	1787.89
Replete	jgi|Auran1|59038	26380.1	1	6	6	6	0.0002	0.432	GEFGLPTPAESNALMATK	R	L	0.95	3.79	0.546	0	1	0	0	2	1849.9
Replete	jgi|Auran1|59038	26380.1	1	6	6	6	0.0002	0.432	IQYGGSANAANAPDLSAMPDIDGFLVGGASMK	R	A	0.95	4.98	0.662	0	0	1	0	2	3138.49
Replete	jgi|Auran1|59038	26380.1	1	6	6	6	0.0002	0.432	RGEFGLPTPAESNALMATK	R	L	0.95	3.21	0.487	0	0	1	0	2	2006
Replete	jgi|Auran1|59038	26380.1	1	6	6	6	0.0002	0.432	VVIAYEPVWAIGTGVTASPEQAQETHK	R	A	0.95	3.4	0.501	0	0	1	0	2	2881.47
Replete	jgi|Auran1|71078	142606	0.998	2	2	3	0.0001	0.0348	FATSLDTDGLSSILPK	K	N	0.95	4.04	0.577	0	1	0	0	2	1664.88
Replete	jgi|Auran1|71078	142606	0.998	2	2	3	0.0001	0.0348	GSVAPADLGATNQALYSWVGAAVGVAGLAK	K	P	0.95	4.62	0.506	0	0	2	0	1	2814.48
Replete	jgi|Auran1|71070	26124.2	1	5	6	11	0.0004	0.361	LAMLGIAGLAAK	R	S	0.95	3.84	0.5	0	3	0	0	2	1144.68
Replete	jgi|Auran1|71070	26124.2	1	5	6	11	0.0004	0.361	LKDPAYIPGDLGLGQGEGR	R	W	0.95	5.97	0.572	0	1	3	0	2	1956.02
Replete	jgi|Auran1|71070	26124.2	1	5	6	11	0.0004	0.361	SSGTDIGVLQQLGESFSRPEFVSK	K	A	0.95	3.71	0.31	0	0	1	0	2	2568.29
Replete	jgi|Auran1|71070	26124.2	1	5	6	11	0.0004	0.361	WNPFGFDYTAEEYYDK	R	Q	0.95	4.08	0.622	0	1	0	0	2	2044.86
Replete	jgi|Auran1|71070	26124.2	1	5	6	11	0.0004	0.361	YAPGAWWQGDEGDGSLK	K	I	0.95	3.36	0.566	0	2	0	0	2	1836.82
Replete	jgi|Auran1|35224	13477.7	0.998	2	2	2	0.0001	0.216	ALCDEGGVNLIMVDEGR	R	Q	0.95	5.21	0.584	0	1	0	0	2	1863.86
Replete	jgi|Auran1|35224	13477.7	0.998	2	2	2	0.0001	0.216	QLGEWAGLCK	R	I	0.95	2.22	0.451	0	1	0	0	2	1161.57
Replete	jgi|Auran1|5527	28343	1	8	9	10	0.0004	0.311	EAAKPDPLFQATPR	K	N	0.95	3.28	0.31	0	1	1	0	2	1540.81
Replete	jgi|Auran1|5527	28343	1	8	9	10	0.0004	0.311	HVTYLVENK	K	K	0.95	3.18	0.512	0	1	0	0	2	1102.59
Replete	jgi|Auran1|5527	28343	1	8	9	10	0.0004	0.311	KEDQHSLDQLR	K	S	0.95	2.15	0.33	0	0	1	0	2	1368.69
Replete	jgi|Auran1|5527	28343	1	8	9	10	0.0004	0.311	KMDVPYCIVK	K	N	0.95	2.47	0.387	0	1	0	0	2	1252.64
Replete	jgi|Auran1|5527	28343	1	8	9	10	0.0004	0.311	LKVPPALNQFATTLDK	R	N	0.95	2.82	0.385	0	1	0	0	2	1756
Replete	jgi|Auran1|5527	28343	1	8	9	10	0.0004	0.311	TAAVCCLTTVK	K	K	0.95	2.68	0.49	0	1	0	0	2	1223.61
Replete	jgi|Auran1|5527	28343	1	8	9	10	0.0004	0.311	VPPALNQFATTLDK	K	N	0.95	4.48	0.603	0	2	0	0	2	1514.82
Replete	jgi|Auran1|5527	28343	1	8	9	10	0.0004	0.311	VPPALNQFATTLDKNQAAELFK	K	L	0.95	1.55	0.381	0	0	1	0	2	2416.29
Replete	jgi|Auran1|6356	22395.3	0.998	2	3	6	0.0002	0.146	DLAICNSPNQDNPLMK	K	G	0.95	4.13	0.574	0	3	0	0	2	1845.85
Replete	jgi|Auran1|6356	22395.3	0.998	2	3	6	0.0002	0.146	LDEKDQPPIAELMK	K	D	0.95	3.3	0.418	0	2	1	0	2	1642.84
Replete	jgi|Auran1|68429	139605	1	4	4	4	0.0002	0.0431	GLEASDTSPEAAGGVK	K	L	0.95	2.56	0.31	0	1	0	0	2	1488.72
Replete	jgi|Auran1|68429	139605	1	4	4	4	0.0002	0.0431	RAALAEAAAAR	R	D	0.95	2.8	0.187	0	1	0	0	2	1070.61
Replete	jgi|Auran1|68429	139605	1	4	4	4	0.0002	0.0431	RSTMIFGPVQTLNFWLMPTHLR	R	V	0.95	2.94	0.259	0	0	1	0	2	2645.39
Replete	jgi|Auran1|68429	139605	1	4	4	4	0.0002	0.0431	YANICAWSFK	K	K	0.95	2.35	0.453	0	1	0	0	2	1259.59	jgi|Auran1|72267
Replete	jgi|Auran1|69644	52463.9	1	9	9	13	0.0005	0.277	DGELLFPAINVNDSVTK	K	S	0.95	4.48	0.567	0	1	0	0	2	1831.94
Replete	jgi|Auran1|69644	52463.9	1	9	9	13	0.0005	0.277	DGTLPDPSSTDNAEFK	K	I	0.95	3.61	0.5	0	2	0	0	2	1693.76
Replete	jgi|Auran1|69644	52463.9	1	9	9	13	0.0005	0.277	DNAIVGNIGHFDNEIDMDGLMK	R	V	0.95	4.09	0.415	0	0	1	0	2	2450.1
Replete	jgi|Auran1|69644	52463.9	1	9	9	13	0.0005	0.277	EIELAEYEMPGLMK	R	T	0.95	4.01	0.566	0	3	0	0	2	1684.78
Replete	jgi|Auran1|69644	52463.9	1	9	9	13	0.0005	0.277	GDGPDLIVDDGGDMTLLVHEGFK	K	A	0.95	3.62	0.456	0	0	2	0	2	2416.13
Replete	jgi|Auran1|69644	52463.9	1	9	9	13	0.0005	0.277	GPILLAEGR	K	L	0.95	3.33	0.467	0	1	0	0	2	925.547
Replete	jgi|Auran1|69644	52463.9	1	9	9	13	0.0005	0.277	HSVIDGICR	K	A	0.95	2.43	0.388	0	1	0	0	2	1056.53
Replete	jgi|Auran1|69644	52463.9	1	9	9	13	0.0005	0.277	TVEEYGAAQPLK	K	G	0.95	3.45	0.463	0	1	0	0	2	1305.67
Replete	jgi|Auran1|69644	52463.9	1	9	9	13	0.0005	0.277	VADISLADFGR	R	R	0.95	3.84	0.575	0	1	0	0	2	1163.61
Replete	jgi|Auran1|70049	36983.9	1	4	5	6	0.0002	0.154	AIIVFVPFGLLK	K	S	0.95	3.24	0.418	0	1	0	0	2	1316.83
Replete	jgi|Auran1|70049	36983.9	1	4	5	6	0.0002	0.154	HVIIVAQR	R	T	0.95	2.3	0.265	0	1	0	0	2	935.579
Replete	jgi|Auran1|70049	36983.9	1	4	5	6	0.0002	0.154	LDTFSFVYK	K	K	0.95	2.46	0.447	0	1	0	0	2	1119.57
Replete	jgi|Auran1|70049	36983.9	1	4	5	6	0.0002	0.154	TLTSVQDCILDDLVYPTEIVGK	R	R	0.95	4.37	0.569	0	2	1	0	2	2479.26
Replete	jgi|Auran1|59252	34420.7	1	3	3	3	0.0001	0.132	AFGADLVLTPAAK	K	G	0.95	3.36	0.494	0	1	0	0	2	1273.72
Replete	jgi|Auran1|59252	34420.7	1	3	3	3	0.0001	0.132	GYDIVLTMPESMSMER	K	R	0.95	2.56	0.375	0	1	0	0	2	1906.82
Replete	jgi|Auran1|59252	34420.7	1	3	3	3	0.0001	0.132	GYLLQQFNNPDNPK	K	V	0.95	4.46	0.531	0	1	0	0	2	1647.81
Replete	jgi|Auran1|59236	50445.7	1	14	15	21	0.0008	0.471	AALVYGQMNEPPGAR	K	A	0.95	3.67	0.44	0	1	0	0	2	1589.77
Replete	jgi|Auran1|59236	50445.7	1	14	15	21	0.0008	0.471	AFNDVLTGDYDDLPEAAFYMVGGIDDVIEK	K	A	0.95	5.48	0.572	0	0	1	0	2	3308.52
Replete	jgi|Auran1|59236	50445.7	1	14	15	21	0.0008	0.471	APPTFVEQGK	R	T	0.95	3.1	0.45	0	1	0	0	2	1073.56
Replete	jgi|Auran1|59236	50445.7	1	14	15	21	0.0008	0.471	DIASLGIYPAVDPLDSSSR	R	M	0.95	4.18	0.597	0	1	0	0	2	1976
Replete	jgi|Auran1|59236	50445.7	1	14	15	21	0.0008	0.471	EGNDLYHEMIESGVIK	R	I	0.95	2.47	0.28	0	0	1	0	2	1833.87
Replete	jgi|Auran1|59236	50445.7	1	14	15	21	0.0008	0.471	GQEFVDCGAPITIPVGPECLGR	R	I	0.95	3.47	0.449	0	1	0	0	2	2372.14
Replete	jgi|Auran1|59236	50445.7	1	14	15	21	0.0008	0.471	IGLFGGAGVGK	K	T	0.95	3.51	0.399	0	3	0	0	2	975.563
Replete	jgi|Auran1|59236	50445.7	1	14	15	21	0.0008	0.471	IPSAVGYQPTLATDMGGLQER	R	I	0.95	5.24	0.711	0	2	0	0	2	2220.1
Replete	jgi|Auran1|59236	50445.7	1	14	15	21	0.0008	0.471	IVNVIGEAVDDAGPVK	R	T	0.95	4.61	0.645	0	2	0	0	2	1595.86
Replete	jgi|Auran1|59236	50445.7	1	14	15	21	0.0008	0.471	LPPILNALETTMNGER	K	L	0.95	3.52	0.492	0	1	0	0	2	1784.92
Replete	jgi|Auran1|59236	50445.7	1	14	15	21	0.0008	0.471	LVLEVAQHLGENTVR	R	T	0.95	3.55	0.383	0	1	1	0	2	1677.93
Replete	jgi|Auran1|59236	50445.7	1	14	15	21	0.0008	0.471	TIAMDATEGLVR	R	G	0.95	3.24	0.478	0	3	0	0	2	1276.66
Replete	jgi|Auran1|59236	50445.7	1	14	15	21	0.0008	0.471	TQEILTTGIK	K	V	0.95	2.62	0.427	0	1	0	0	2	1103.63
Replete	jgi|Auran1|59236	50445.7	1	14	15	21	0.0008	0.471	VVDLLAPYAK	K	G	0.95	2.92	0.411	0	1	0	0	2	1088.64
Replete	jgi|Auran1|59217	18041	0.998	2	2	2	0.0001	0.161	AGDAVTFDSWLGSHK	K	V	0.95	2.98	0.275	0	0	1	0	2	1590.76
Replete	jgi|Auran1|59217	18041	0.998	2	2	2	0.0001	0.161	GDATYLIVDEDK	K	T	0.95	3.08	0.371	0	1	0	0	2	1338.64
Replete	jgi|Auran1|59202	31024.8	0.998	2	2	2	0.0001	0.133	SYSTPPPPVDLDSEYWPGNINR	R	Y	0.95	2.45	0.217	0	0	1	0	2	2504.17
Replete	jgi|Auran1|59202	31024.8	0.998	2	2	2	0.0001	0.133	TLPYWDAAVVPALER	R	G	0.95	4.01	0.512	0	1	0	0	2	1700.9
Replete	jgi|Auran1|60228	28209.8	0.998	2	2	3	0.0001	0.102	NVTTFSPEGR	R	L	0.95	2.14	0.399	0	1	0	0	2	1107.54
Replete	jgi|Auran1|60228	28209.8	0.998	2	2	3	0.0001	0.102	TMESLSAESIDLFALK	K	R	0.95	3.56	0.557	0	2	0	0	2	1770.88
Replete	jgi|Auran1|60218	15058.6	0.998	2	2	3	0.0001	0.25	LPSACPGDLVMATCK	K	K	0.95	2.73	0.559	0	2	0	0	2	1619.76
Replete	jgi|Auran1|60218	15058.6	0.998	2	2	3	0.0001	0.25	MTLGLPMSAVMNCADNSGAK	R	N	0.95	3.07	0.412	0	1	0	0	2	2099.92
Replete	jgi|Auran1|60213	21090.6	1	3	3	3	0.0001	0.174	AFLEDVLQFK	K	Q	0.95	2.78	0.268	0	1	0	0	2	1209.65
Replete	jgi|Auran1|60213	21090.6	1	3	3	3	0.0001	0.174	GLDVDDLVVK	K	H	0.95	3.22	0.322	0	1	0	0	2	1072.59
Replete	jgi|Auran1|60213	21090.6	1	3	3	3	0.0001	0.174	YSYDADSATESSK	K	A	0.95	3.9	0.641	0	1	0	0	2	1423.59
Replete	jgi|Auran1|71070	26124.2	1	5	6	9	0.0003	0.361	LAMLGIAGLAAK	R	S	0.95	4.06	0.43	0	2	0	0	2	1144.68
Replete	jgi|Auran1|71070	26124.2	1	5	6	9	0.0003	0.361	LKDPAYIPGDLGLGQGEGR	R	W	0.95	5.54	0.6	0	1	2	0	2	1956.02
Replete	jgi|Auran1|71070	26124.2	1	5	6	9	0.0003	0.361	SSGTDIGVLQQLGESFSRPEFVSK	K	A	0.95	3.53	0.4	0	0	1	0	2	2568.29
Replete	jgi|Auran1|71070	26124.2	1	5	6	9	0.0003	0.361	WNPFGFDYTAEEYYDK	R	Q	0.95	4.12	0.635	0	1	0	0	2	2044.86
Replete	jgi|Auran1|71070	26124.2	1	5	6	9	0.0003	0.361	YAPGAWWQGDEGDGSLK	K	I	0.95	3.4	0.594	0	2	0	0	2	1836.82
Replete	jgi|Auran1|60208	31106.4	1	4	4	5	0.0002	0.185	IEITNPVNLLR	R	K	0.95	3.24	0.402	0	2	0	0	2	1281.75
Replete	jgi|Auran1|60208	31106.4	1	4	4	5	0.0002	0.185	VGNSEAVLLQK	R	L	0.95	3.83	0.333	0	1	0	0	2	1157.65
Replete	jgi|Auran1|60208	31106.4	1	4	4	5	0.0002	0.185	VLDLTDADLSCK	K	F	0.95	4.15	0.648	0	1	0	0	2	1349.66
Replete	jgi|Auran1|60208	31106.4	1	4	4	5	0.0002	0.185	VLGNVGFVFTNEDLADVR	K	E	0.95	2.77	0.472	0	1	0	0	2	1965.01
Replete	jgi|Auran1|60205	21053.3	1	5	5	8	0.0003	0.305	APTPQEPEPSVYR	K	M	0.95	2.36	0.315	0	1	0	0	2	1470.72
Replete	jgi|Auran1|60205	21053.3	1	5	5	8	0.0003	0.305	DLTLTGAIDQLYSEMAGR	R	H	0.95	4.81	0.634	0	3	0	0	2	1953.96
Replete	jgi|Auran1|60205	21053.3	1	5	5	8	0.0003	0.305	KAPTPQEPEPSVYR	R	M	0.95	3.39	0.309	0	0	1	0	2	1598.82
Replete	jgi|Auran1|60205	21053.3	1	5	5	8	0.0003	0.305	LFAPNEVLAR	K	S	0.95	3.02	0.316	0	1	0	0	2	1129.64
Replete	jgi|Auran1|60205	21053.3	1	5	5	8	0.0003	0.305	TTGEILDVNEIR	K	E	0.95	3.75	0.465	0	2	0	0	2	1359.71
Replete	jgi|Auran1|28035	41752.2	0.998	2	2	2	0.0001	0.0763	GFEVGSGFDGTLLAGK	K	D	0.95	2.79	0.298	0	1	0	0	2	1554.78
Replete	jgi|Auran1|28035	41752.2	0.998	2	2	2	0.0001	0.0763	VPLSEVPIQFELDR	R	R	0.95	3.11	0.258	0	1	0	0	2	1641.89
Replete	jgi|Auran1|28033	23501.4	1	6	6	7	0.0003	0.446	AGFEGGQTPLYR	R	R	0.95	2.88	0.359	0	1	0	0	2	1295.64
Replete	jgi|Auran1|28033	23501.4	1	6	6	7	0.0003	0.446	ESVEEAGVDAFEFR	R	V	0.95	3.52	0.511	0	1	0	0	2	1584.72
Replete	jgi|Auran1|28033	23501.4	1	6	6	7	0.0003	0.446	GISAGQGATCGFGMR	R	G	0.95	2.7	0.45	0	1	0	0	2	1485.66
Replete	jgi|Auran1|28033	23501.4	1	6	6	7	0.0003	0.446	LGQLSTLEPNSEVDYAALMEK	K	G	0.95	5.47	0.618	0	1	0	0	2	2308.14
Replete	jgi|Auran1|28033	23501.4	1	6	6	7	0.0003	0.446	LVGRPTGPGHTNEVFSLIK	K	L	0.95	2.77	0.252	0	0	1	0	2	2022.11
Replete	jgi|Auran1|28033	23501.4	1	6	6	7	0.0003	0.446	VVGSASDDVPLPEGLTVK	K	A	0.95	4.86	0.604	0	2	0	0	2	1782.95
Replete	jgi|Auran1|31507	48498.6	1	3	3	3	0.0001	0.133	ALGFEPTLLNDK	R	L	0.95	3.3	0.324	0	1	0	0	2	1317.71
Replete	jgi|Auran1|31507	48498.6	1	3	3	3	0.0001	0.133	CIELAINNPPAEGEGVEIFNQVAETR	K	R	0.95	3.35	0.354	0	0	1	0	2	2870.4
Replete	jgi|Auran1|31507	48498.6	1	3	3	3	0.0001	0.133	NIDTELGCDSLTPITHPEVR	R	L	0.95	3.74	0.376	0	0	1	0	2	2267.1
Replete	jgi|Auran1|17219	10921.8	0.998	2	2	2	0.0001	0.22	IQNFAGVVIK	R	R	0.95	2.72	0.243	0	1	0	0	2	1088.65
Replete	jgi|Auran1|17219	10921.8	0.998	2	2	2	0.0001	0.22	SGGGVTQTFTVR	R	K	0.95	3.29	0.454	0	1	0	0	2	1209.62
Replete	jgi|Auran1|20700	38602.5	1	5	5	5	0.0002	0.232	EGGLAVIEAMCEK	K	L	0.95	2.94	0.475	0	1	0	0	2	1422.66
Replete	jgi|Auran1|20700	38602.5	1	5	5	5	0.0002	0.232	GGNHVLVLCDTYEPDGTPLPTNTR	R	A	0.95	3.75	0.345	0	0	1	0	2	2626.26
Replete	jgi|Auran1|20700	38602.5	1	5	5	5	0.0002	0.232	PQGPYYCGAGADR	K	A	0.95	3.53	0.469	0	1	0	0	1	1411.61
Replete	jgi|Auran1|20700	38602.5	1	5	5	5	0.0002	0.232	VQGPVDAYPK	K	W	0.95	2.01	0.239	0	1	0	0	2	1073.56
Replete	jgi|Auran1|20700	38602.5	1	5	5	5	0.0002	0.232	WNYDGSSTGQAPGDDSEVMIVPR	K	A	0.95	3.21	0.379	0	0	1	0	2	2497.09
Replete	jgi|Auran1|72895	41628	1	3	4	13	0.0005	0.139	HTEGLCDWSNSAVEVTGEFK	K	Y	0.95	2.93	0.244	0	0	1	0	2	2266.01
Replete	jgi|Auran1|72895	41628	1	3	4	13	0.0005	0.139	WVFGSHACMSDCALANK	K	K	0.95	4.73	0.572	0	2	5	0	2	1953.84
Replete	jgi|Auran1|72895	41628	1	3	4	13	0.0005	0.139	YEYPVDSPMEWSPYAK	K	A	0.95	4.54	0.683	0	5	0	0	2	1961.86
Replete	jgi|Auran1|53011	51307.2	0.998	2	2	2	0.0001	0.0576	ICDVVQITLNK	K	N	0.95	3.72	0.294	0	1	0	0	2	1302.71
Replete	jgi|Auran1|53011	51307.2	0.998	2	2	2	0.0001	0.0576	YYGGNEIIDQIENMCK	R	S	0.95	4.77	0.549	0	1	0	0	2	1946.86
Replete	jgi|Auran1|53005	30655.4	0.998	2	2	2	0.0001	0.0882	PGTAGVYDTAVALGAAK	R	C	0.95	5.18	0.621	0	1	0	0	1	1561.82
Replete	jgi|Auran1|53005	30655.4	0.998	2	2	2	0.0001	0.0882	STGGDTSGPRPGTAGVYDTAVALGAAK	R	C	0.95	5.15	0.644	0	0	1	0	2	2477.23
Replete	jgi|Auran1|24362	40859.8	0.998	2	2	2	0.0001	0.0785	DAAAMVNVLGEADAPK	R	G	0.95	2.61	0.251	0	1	0	0	2	1587.77
Replete	jgi|Auran1|24362	40859.8	0.998	2	2	2	0.0001	0.0785	VTLDLPLGSVAPVR	R	D	0.95	3.11	0.35	0	1	0	0	2	1436.85
Replete	jgi|Auran1|24359	53281.5	1	4	4	4	0.0002	0.167	AECSDVANAVLDGADAVMLSGETAGGK	R	F	0.95	5.03	0.499	0	0	1	0	2	2608.19
Replete	jgi|Auran1|24359	53281.5	1	4	4	4	0.0002	0.167	AGAPLTLTTDYDYK	K	S	0.95	4.46	0.555	0	1	0	0	2	1528.75
Replete	jgi|Auran1|24359	53281.5	1	4	4	4	0.0002	0.167	GASGATVVESTVAAATQAAR	R	D	0.95	3.35	0.512	0	1	0	0	2	1817.94
Replete	jgi|Auran1|24359	53281.5	1	4	4	4	0.0002	0.167	IENQEGLANFEGIVAATDAVMVAR	K	G	0.95	5.01	0.434	0	0	1	0	2	2534.26
Replete	jgi|Auran1|6122	18599.8	1	6	7	12	0.0005	0.471	ALDSGLLLVSGPFSVNGVPIK	K	R	0.95	4.76	0.588	0	4	0	0	2	2083.18
Replete	jgi|Auran1|6122	18599.8	1	6	7	12	0.0005	0.471	ASLQPGAVLILLAGR	R	F	0.95	4.73	0.493	0	1	0	0	2	1478.91
Replete	jgi|Auran1|6122	18599.8	1	6	7	12	0.0005	0.471	DAEGDFFAADAAAPAPELSDER	K	K	0.95	5.69	0.654	0	2	1	0	2	2265
Replete	jgi|Auran1|6122	18599.8	1	6	7	12	0.0005	0.471	DQATLDAALVK	K	A	0.95	3.09	0.268	0	1	0	0	2	1144.62
Replete	jgi|Auran1|6122	18599.8	1	6	7	12	0.0005	0.471	KDAEGDFFAADAAAPAPELSDER	K	K	0.95	2.42	0.303	0	0	1	0	2	2393.09
Replete	jgi|Auran1|6122	18599.8	1	6	7	12	0.0005	0.471	VNPAYVIATSTK	R	V	0.95	3.07	0.586	0	2	0	0	2	1263.69
Replete	jgi|Auran1|37826	51472.6	1	6	7	9	0.0003	0.213	CMLWETSLLDAAEGIR	K	F	0.95	5	0.615	0	1	0	0	2	1880.89
Replete	jgi|Auran1|37826	51472.6	1	6	7	9	0.0003	0.213	GIGALSQVFWDR	R	A	0.95	3.4	0.529	0	1	0	0	2	1348.7
Replete	jgi|Auran1|37826	51472.6	1	6	7	9	0.0003	0.213	GPAGDGEPTPEALTWLLLTGEVPTK	K	E	0.95	5.16	0.629	0	1	2	0	2	2549.31
Replete	jgi|Auran1|37826	51472.6	1	6	7	9	0.0003	0.213	GYTIPECQEILPTFK	R	G	0.95	2.09	0.401	0	1	0	0	2	1795.89
Replete	jgi|Auran1|37826	51472.6	1	6	7	9	0.0003	0.213	MLGMESPAFDELMR	R	L	0.95	3.26	0.427	0	2	0	0	2	1658.72
Replete	jgi|Auran1|37826	51472.6	1	6	7	9	0.0003	0.213	SQYWDSTYEDVIDVIAK	K	L	0.95	5.01	0.616	0	1	0	0	2	2031.96
Replete	jgi|Auran1|72838	109420	0.998	2	2	2	0.0001	0.0284	CVCGTACEPQAR	R	C	0.95	2.69	0.41	0	1	0	0	2	1408.58
Replete	jgi|Auran1|72838	109420	0.998	2	2	2	0.0001	0.0284	LASDDELCGNLCTNGGR	K	Y	0.95	3.67	0.528	0	1	0	0	2	1851.8
Replete	jgi|Auran1|60177	25498.5	1	6	6	10	0.0004	0.286	EEAPMPVANFEEGMGK	K	A	0.95	2.3	0.367	0	1	0	0	2	1751.76
Replete	jgi|Auran1|60177	25498.5	1	6	6	10	0.0004	0.286	ELAEDGYAGVEVR	R	V	0.95	3.72	0.548	0	3	0	0	2	1407.68
Replete	jgi|Auran1|60177	25498.5	1	6	6	10	0.0004	0.286	GLCAQAQAESLK	R	Y	0.95	3.69	0.423	0	1	0	0	2	1275.64
Replete	jgi|Auran1|60177	25498.5	1	6	6	10	0.0004	0.286	NTLADVVTILEPK	K	E	0.95	2.72	0.275	0	2	0	0	2	1412.8
Replete	jgi|Auran1|60177	25498.5	1	6	6	10	0.0004	0.286	NTLADVVTILEPKEEAPMPVANFEEGMGK	K	A	0.95	4.74	0.562	0	0	2	0	2	3161.54
Replete	jgi|Auran1|60177	25498.5	1	6	6	10	0.0004	0.286	VSIMLPHDASGK	K	T	0.95	2.37	0.352	0	1	0	0	2	1270.65
Replete	jgi|Auran1|60167	22047.5	1	2	2	2	0.0001	0.169	GPYQTNLLLGGFDK	K	G	0.95	4.06	0.475	0	1	0	0	2	1522.79
Replete	jgi|Auran1|60167	22047.5	1	2	2	2	0.0001	0.169	LLGQSGVGADNVAFTEYVQK	K	N	0.95	5.94	0.517	0	1	0	0	2	2096.07
Replete	jgi|Auran1|70352	36557.1	1	6	6	6	0.0002	0.297	GACYNIIPSGTGAAK	R	A	0.95	3.32	0.459	0	1	0	0	2	1479.73
Replete	jgi|Auran1|70352	36557.1	1	6	6	6	0.0002	0.297	GTVEAAEDAIIVDGEK	K	I	0.95	5.15	0.478	0	1	0	0	2	1616.8
Replete	jgi|Auran1|70352	36557.1	1	6	6	6	0.0002	0.297	LQAGASYDDIK	K	A	0.95	3.36	0.411	0	1	0	0	2	1180.59
Replete	jgi|Auran1|70352	36557.1	1	6	6	6	0.0002	0.297	LVSWYDNECGYSNK	K	V	0.95	4.11	0.572	0	1	0	0	2	1734.74
Replete	jgi|Auran1|70352	36557.1	1	6	6	6	0.0002	0.297	VINDTYGIEEGLMTTVHSVTATQQTVDGPSQK	K	D	0.95	4.05	0.414	0	0	1	0	2	3435.66
Replete	jgi|Auran1|70352	36557.1	1	6	6	6	0.0002	0.297	VPTANVSVVDLTCK	R	L	0.95	4.49	0.618	0	1	0	0	2	1502.79
Replete	jgi|Auran1|32040	35872	0.998	2	2	2	0.0001	0.0731	ICTAASPDAAYGLCK	K	A	0.95	4.09	0.518	0	1	0	0	2	1597.74
Replete	jgi|Auran1|32040	35872	0.998	2	2	2	0.0001	0.0731	LTQQTFGALR	K	A	0.95	2.83	0.303	0	1	0	0	2	1134.63
Replete	jgi|Auran1|58588	74801.5	1	3	3	3	0.0001	0.079	GAALSLLTEAYQSR	K	D	0.95	2.59	0.265	0	1	0	0	2	1479.78
Replete	jgi|Auran1|58588	74801.5	1	3	3	3	0.0001	0.079	QLEDQGGSVAENLLALETEVVR	K	A	0.95	4.29	0.42	0	0	1	0	2	2370.22
Replete	jgi|Auran1|58588	74801.5	1	3	3	3	0.0001	0.079	TSEGAIGDLVQGAVGNMKG	K	-	0.95	2.61	0.4	0	1	0	0	2	1819.89
Replete	jgi|Auran1|23768	23916.3	1	5	5	8	0.0003	0.281	AMAQIQELYGK	K	M	0.95	3.31	0.514	0	1	0	0	2	1251.64
Replete	jgi|Auran1|23768	23916.3	1	5	5	8	0.0003	0.281	MSEGPLVLNQITR	K	W	0.95	3.61	0.513	0	3	0	0	2	1473.77
Replete	jgi|Auran1|23768	23916.3	1	5	5	8	0.0003	0.281	QNVDPSFSAGLK	K	H	0.95	2.26	0.271	0	1	0	0	2	1262.64
Replete	jgi|Auran1|23768	23916.3	1	5	5	8	0.0003	0.281	TITLDVEPSDTIDNVK	K	Q	0.95	4.28	0.507	0	2	0	0	2	1759.9
Replete	jgi|Auran1|23768	23916.3	1	5	5	8	0.0003	0.281	TLSDYNIQK	R	E	0.95	2.47	0.395	0	1	0	0	2	1081.55
Replete	jgi|Auran1|28333	31243.8	1	2	2	3	0.0001	0.112	DTIGVAACPVPGVPAPPK	R	-	0.95	3.19	0.491	0	2	0	0	2	1745.93
Replete	jgi|Auran1|28333	31243.8	1	2	2	3	0.0001	0.112	FYNTWVTDPAAAQK	K	M	0.95	4.67	0.463	0	1	0	0	2	1611.78
Replete	jgi|Auran1|68761	25442.6	0.998	2	2	2	0.0001	0.135	DDFSAYIVPGDCIGFVMGR	R	N	0.95	3.79	0.525	0	1	0	0	2	2134.96
Replete	jgi|Auran1|68761	25442.6	0.998	2	2	2	0.0001	0.135	VGPVTINMDTPR	R	D	0.95	2.99	0.606	0	1	0	0	2	1315.67
Replete	jgi|Auran1|58864	22287.7	1	2	2	5	0.0002	0.116	LQCFEGVPPPYDK	R	M	0.95	3.5	0.448	0	4	0	0	2	1549.74
Replete	jgi|Auran1|58864	22287.7	1	2	2	5	0.0002	0.116	VADVLEAFGH	K	-	0.95	2.63	0.445	0	1	0	0	2	1057.53
Replete	jgi|Auran1|66270	41327.3	0.998	2	2	3	0.0001	0.104	LTDVVEPWFLGGGADGPGGAEFAAFK	K	R	0.95	4.75	0.443	0	0	1	0	2	2608.27
Replete	jgi|Auran1|66270	41327.3	0.998	2	2	3	0.0001	0.104	VGPSSGNEFTDFSR	R	I	0.95	3.87	0.5	0	2	0	0	2	1499.68
Replete	jgi|Auran1|54007	26906.9	1	3	5	13	0.0005	0.233	ATIISLGGYDDVSNIVAESTSTR	K	R	0.95	5.16	0.713	0	1	0	0	2	2369.18	jgi|Auran1|64431
Replete	jgi|Auran1|54007	26906.9	1	3	5	13	0.0005	0.233	SPEAADALEGAGVDK	R	E	0.95	4.8	0.551	0	2	0	0	2	1429.68
Replete	jgi|Auran1|54007	26906.9	1	3	5	13	0.0005	0.233	SPEAADALEGAGVDKEK	R	T	0.95	5.14	0.602	0	3	5	0	2	1686.82
Replete	jgi|Auran1|54007	26906.9	1	3	5	13	0.0005	0.233	VTTSLFMTGLSASDVNEDADVR	K	A	0.95	5.92	0.658	0	2	1	0	2	2328.1
Replete	jgi|Auran1|38325	18159.4	0.998	2	3	3	0.0001	0.113	MSTYLTTYK	K	M	0.95	1.98	0.266	0	1	0	0	2	1123.53
Replete	jgi|Auran1|38325	18159.4	0.998	2	3	3	0.0001	0.113	TGVIYNVTK	R	R	0.95	2.85	0.342	1	1	0	0	2	994.557
Replete	jgi|Auran1|37568	19310.6	1	3	3	4	0.0002	0.161	DPLTGSSFDVK	R	T	0.95	2.7	0.377	0	1	0	0	2	1165.57
Replete	jgi|Auran1|37568	19310.6	1	3	3	4	0.0002	0.161	SPVLGTPMAAGSVANGLIR	K	D	0.95	3.93	0.54	0	1	0	0	2	1810.99
Replete	jgi|Auran1|37568	19310.6	1	3	3	4	0.0002	0.161	SPVLGTPMAAGSVANGLIRDPLTGSSFDVK	K	T	0.95	5	0.647	0	0	2	0	2	2973.54
Replete	jgi|Auran1|15117	16039.2	0.998	2	2	4	0.0002	0.178	APGDVGGVFFR	K	R	0.95	3.44	0.5	0	2	0	0	2	1121.57
Replete	jgi|Auran1|15117	16039.2	0.998	2	2	4	0.0002	0.178	VAMLATVGYLYNDLK	R	L	0.95	3.3	0.425	0	2	0	0	2	1686.88
Replete	jgi|Auran1|27339	52049	1	5	5	6	0.0002	0.224	EAGITYLNR	R	L	0.95	2.34	0.335	0	1	0	0	2	1036.54
Replete	jgi|Auran1|27339	52049	1	5	5	6	0.0002	0.224	LGCPGGEHAIDSDDLFSLPK	K	A	0.95	3.36	0.532	0	0	2	0	2	2128
Replete	jgi|Auran1|27339	52049	1	5	5	6	0.0002	0.224	TEPMDYECVATTIFTPLEYGTIGLSEDDAK	K	A	0.95	4.43	0.48	0	0	1	0	2	3382.52
Replete	jgi|Auran1|27339	52049	1	5	5	6	0.0002	0.224	VAVLDFVKPSPAGSTWGLGGTCVNVGCIPK	K	K	0.95	4.69	0.64	0	0	1	0	2	3086.58
Replete	jgi|Auran1|27339	52049	1	5	5	6	0.0002	0.224	YADTAALGIDNVPGASANVNAK	R	T	0.95	6.03	0.57	0	1	0	0	2	2132.06
Replete	jgi|Auran1|37524	239720	0.998	2	2	2	0.0001	0.0166	FAPLGAAVDALTGDVTSDLR	K	L	0.95	4.74	0.556	0	1	0	0	2	1989.03
Replete	jgi|Auran1|37524	239720	0.998	2	2	2	0.0001	0.0166	YGATPDDGDESLLQYR	R	L	0.95	3.41	0.527	0	1	0	0	2	1799.81
Replete	jgi|Auran1|27306	35828.5	1	8	9	14	0.0005	0.342	AEAGIEFFEWLNQEEPVSA	K	-	0.95	5.1	0.499	0	1	0	0	2	2166
Replete	jgi|Auran1|27306	35828.5	1	8	9	14	0.0005	0.342	AFLAALDGNCK	R	T	0.95	3.27	0.393	0	1	0	0	2	1179.58
Replete	jgi|Auran1|27306	35828.5	1	8	9	14	0.0005	0.342	DGSVIGSASLR	K	R	0.95	3.1	0.325	0	1	0	0	2	1061.56
Replete	jgi|Auran1|27306	35828.5	1	8	9	14	0.0005	0.342	GSPLALAQAYMTR	R	E	0.95	3.61	0.506	0	1	0	0	2	1394.71
Replete	jgi|Auran1|27306	35828.5	1	8	9	14	0.0005	0.342	IVDGELLFDGLVSSLDGQQMYR	R	A	0.95	6.29	0.602	0	2	3	0	2	2471.21
Replete	jgi|Auran1|27306	35828.5	1	8	9	14	0.0005	0.342	LDEGVVDATLLAYAGLK	K	R	0.95	4.72	0.582	0	2	0	0	2	1747.95
Replete	jgi|Auran1|27306	35828.5	1	8	9	14	0.0005	0.342	QSQILAINPTLK	R	C	0.95	3.55	0.309	0	2	0	0	2	1325.78
Replete	jgi|Auran1|27306	35828.5	1	8	9	14	0.0005	0.342	TQGDMILDK	K	A	0.95	2.2	0.236	0	1	0	0	2	1020.5
Replete	jgi|Auran1|35012	11583.7	0.998	2	2	2	0.0001	0.308	AVIEAAGGTADEEQLTALCAAMEGK	K	S	0.95	3.15	0.417	0	0	1	0	2	2522.18
Replete	jgi|Auran1|35012	11583.7	0.998	2	2	2	0.0001	0.308	SFAEMCAAGMEK	K	I	0.95	2.07	0.345	0	1	0	0	2	1363.53
Replete	jgi|Auran1|63510	94794.5	1	4	4	4	0.0002	0.0598	ALDTTAADTYR	K	Y	0.95	3.74	0.448	0	1	0	0	2	1197.58
Replete	jgi|Auran1|63510	94794.5	1	4	4	4	0.0002	0.0598	GFPLAYVGDVVGTGSSR	K	K	0.95	3.25	0.515	0	1	0	0	2	1681.86
Replete	jgi|Auran1|63510	94794.5	1	4	4	4	0.0002	0.0598	LLDNFEGQLPTR	K	L	0.95	3.25	0.382	0	1	0	0	2	1402.73
Replete	jgi|Auran1|63510	94794.5	1	4	4	4	0.0002	0.0598	VADAATVVSTSTR	R	N	0.95	3.76	0.642	0	1	0	0	2	1277.67
Replete	jgi|Auran1|36925	48951.1	0.998	2	3	4	0.0002	0.0874	IGGIGTVPVGR	K	V	0.95	3.71	0.446	1	1	0	0	2	1025.61
Replete	jgi|Auran1|36925	48951.1	0.998	2	3	4	0.0002	0.0874	SGDACMATLAPTKPLCVESFAEYPPLGR	K	F	0.95	4.22	0.625	0	0	2	0	2	3038.44
Replete	jgi|Auran1|70645	198620	0.998	2	2	2	0.0001	0.0136	SGSTFTANFDSAR	K	K	0.95	3.92	0.524	0	1	0	0	2	1360.61
Replete	jgi|Auran1|70645	198620	0.998	2	2	2	0.0001	0.0136	SIEIEWDDAGSK	K	G	0.95	3.48	0.533	0	1	0	0	2	1349.62
Replete	jgi|Auran1|59069	21179.4	0.999	2	2	2	0.0001	0.173	FSDVPNGVQALFK	K	I	0.95	3.81	0.416	0	1	0	0	2	1421.74
Replete	jgi|Auran1|59069	21179.4	0.999	2	2	2	0.0001	0.173	IAMIAVVGYCVPGYIGTFGDVK	R	L	0.95	5.75	0.576	0	1	0	0	2	2346.19
Replete	jgi|Auran1|59068	53958.3	0.998	2	2	2	0.0001	0.0649	ASFLAACEESSAK	R	V	0.95	1.93	0.287	0	1	0	0	2	1370.63
Replete	jgi|Auran1|59068	53958.3	0.998	2	2	2	0.0001	0.0649	MAAVAPNLSTLVGESVGAR	K	L	0.95	3.09	0.346	0	1	0	0	2	1842.97
Replete	jgi|Auran1|60091	20699.4	0.998	2	2	3	0.0001	0.18	SGEDFTDLQNQELK	K	N	0.95	4.45	0.456	0	2	0	0	2	1623.75
Replete	jgi|Auran1|60091	20699.4	0.998	2	2	3	0.0001	0.18	STEVGVGPETGGALFDPAGFTK	R	I	0.95	5.61	0.733	0	1	0	0	2	2137.05
Replete	jgi|Auran1|72743	181364	0.998	2	2	2	0.0001	0.0174	SDTDGEQSVADIAGDVAK	R	A	0.95	5.39	0.534	0	1	0	0	2	1777.81
Replete	jgi|Auran1|72743	181364	0.998	2	2	2	0.0001	0.0174	WFDEILPMIDAK	R	Q	0.95	3.45	0.308	0	1	0	0	2	1477.74
Replete	jgi|Auran1|60089	18488	1	4	5	11	0.0004	0.225	FMAMEVGDLNTK	K	I	0.95	3.6	0.581	0	5	0	0	2	1355.63
Replete	jgi|Auran1|60089	18488	1	4	5	11	0.0004	0.225	PLCDSNGVK	K	G	0.95	2.18	0.282	1	0	0	0	1	989.473
Replete	jgi|Auran1|60089	18488	1	4	5	11	0.0004	0.225	YGDPADLQSYEGGR	K	D	0.95	4.68	0.608	0	2	0	0	2	1527.67
Replete	jgi|Auran1|60089	18488	1	4	5	11	0.0004	0.225	YGDPADLQSYEGGRDEK	K	A	0.95	3.32	0.442	0	1	2	0	2	1899.84
Replete	jgi|Auran1|59049	12233	0.998	2	2	2	0.0001	0.183	LITPSALVER	K	L	0.95	2.76	0.216	0	1	0	0	2	1098.65
Replete	jgi|Auran1|59049	12233	0.998	2	2	2	0.0001	0.183	VLFDEDTYAR	K	L	0.95	1.88	0.39	0	1	0	0	2	1228.59
Replete	jgi|Auran1|52346	36563	0.998	2	2	3	0.0001	0.0885	LDVDEDIGAVVVGFDR	K	E	0.95	3.79	0.567	0	1	0	0	2	1718.86
Replete	jgi|Auran1|52346	36563	0.998	2	2	3	0.0001	0.0885	VIPDFYVDSIADYL	K	-	0.95	2.95	0.578	0	2	0	0	2	1629.81
Replete	jgi|Auran1|60076	41060.7	1	8	9	11	0.0004	0.232	FCVWTSGAFAK	R	L	0.95	3.16	0.548	0	1	0	0	2	1273.6
Replete	jgi|Auran1|60076	41060.7	1	8	9	11	0.0004	0.232	GHVVDAVPEMPLVVDGSVEGSVAK	R	T	0.95	3.03	0.431	0	0	1	0	2	2391.22
Replete	jgi|Auran1|60076	41060.7	1	8	9	11	0.0004	0.232	GPLVIYEDKDAELPR	K	A	0.95	4.2	0.519	0	0	1	0	2	1714.9
Replete	jgi|Auran1|60076	41060.7	1	8	9	11	0.0004	0.232	KGPLVIYEDKDAELPR	R	A	0.95	4.47	0.486	0	0	2	0	2	1843
Replete	jgi|Auran1|60076	41060.7	1	8	9	11	0.0004	0.232	LDALYGGVGVK	K	S	0.95	3.52	0.307	0	1	0	0	2	1091.61
Replete	jgi|Auran1|60076	41060.7	1	8	9	11	0.0004	0.232	LINSDEIQSVVR	R	P	0.95	2.47	0.2	0	1	0	0	1	1372.74
Replete	jgi|Auran1|60076	41060.7	1	8	9	11	0.0004	0.232	LINSDEIQSVVRPAEK	R	D	0.95	4	0.521	0	1	1	0	2	1797.97
Replete	jgi|Auran1|60076	41060.7	1	8	9	11	0.0004	0.232	PCMLNADLAR	R	L	0.95	3.44	0.456	0	2	0	0	1	1176.55
Replete	jgi|Auran1|60075	24249.4	1	3	4	6	0.0002	0.19	INWIVNPTHK	R	H	0.95	2.64	0.332	0	1	0	0	2	1221.67
Replete	jgi|Auran1|60075	24249.4	1	3	4	6	0.0002	0.19	VLNSYWVNQDATYK	R	Y	0.95	4.72	0.648	0	2	0	0	2	1700.83
Replete	jgi|Auran1|60075	24249.4	1	3	4	6	0.0002	0.19	YYEVIAVDPSHAVIR	K	N	0.95	4.49	0.506	0	1	2	0	2	1731.91
Replete	jgi|Auran1|59038	26380.1	1	3	3	4	0.0002	0.308	GEFGLPTPAESNALMATK	R	L	0.95	3.61	0.572	0	1	0	0	2	1849.9
Replete	jgi|Auran1|59038	26380.1	1	3	3	4	0.0002	0.308	IQYGGSANAANAPDLSAMPDIDGFLVGGASMK	R	A	0.95	4.97	0.644	0	0	2	0	2	3154.48
Replete	jgi|Auran1|59038	26380.1	1	3	3	4	0.0002	0.308	VVIAYEPVWAIGTGVTASPEQAQETHK	R	A	0.95	2.62	0.383	0	0	1	0	2	2881.47
Replete	jgi|Auran1|60062	10397.7	0.998	2	2	3	0.0001	0.277	VIAGGAYMLNTPPAVTAK	K	T	0.95	4.03	0.592	0	2	0	0	2	1789.95
Replete	jgi|Auran1|60062	10397.7	0.998	2	2	3	0.0001	0.277	YNCVFCGK	K	D	0.95	2.26	0.479	0	1	0	0	2	1047.44
Replete	jgi|Auran1|72700	76273.1	1	3	3	3	0.0001	0.0577	GIVDSEDLPLNVGR	R	E	0.95	2.36	0.218	0	1	0	0	2	1483.78
Replete	jgi|Auran1|72700	76273.1	1	3	3	3	0.0001	0.0577	SGDGYTTLAEYVER	K	M	0.95	4.21	0.537	0	1	0	0	2	1560.72
Replete	jgi|Auran1|72700	76273.1	1	3	3	3	0.0001	0.0577	VGVVEESGDVQK	K	D	0.95	4.15	0.549	0	1	0	0	2	1245.63
Replete	jgi|Auran1|52316	37264.8	1	9	10	14	0.0005	0.424	CILDVGIQTTTTGNR	K	V	0.95	4.77	0.505	0	1	0	0	2	1648.83
Replete	jgi|Auran1|52316	37264.8	1	9	10	14	0.0005	0.424	EDPSPAEKEEFEVEDR	R	E	0.95	2.92	0.273	0	0	1	0	2	1905.84
Replete	jgi|Auran1|52316	37264.8	1	9	10	14	0.0005	0.424	EYYVEELDDDKRPFK	K	C	0.95	1.89	0.265	0	0	1	0	2	1945.92
Replete	jgi|Auran1|52316	37264.8	1	9	10	14	0.0005	0.424	GATDGGLDIPHNYK	K	R	0.95	4.08	0.438	0	1	0	0	2	1457.7
Replete	jgi|Auran1|52316	37264.8	1	9	10	14	0.0005	0.424	KAEMEEDDEDDEDEEEEEEAEEAPK	K	K	0.95	6.53	0.496	0	0	3	0	2	2969.1
Replete	jgi|Auran1|52316	37264.8	1	9	10	14	0.0005	0.424	VGLDELYEGNTDPEGEVVK	K	T	0.95	5.98	0.661	0	2	0	0	2	2062.98
Replete	jgi|Auran1|52316	37264.8	1	9	10	14	0.0005	0.424	YQQLFADYIK	K	E	0.95	3.39	0.509	0	2	0	0	2	1288.66
Replete	jgi|Auran1|52316	37264.8	1	9	10	14	0.0005	0.424	YVTCAVHSSELVGDK	K	C	0.95	4.64	0.572	0	1	1	0	2	1664.8
Replete	jgi|Auran1|52316	37264.8	1	9	10	14	0.0005	0.424	YVTCAVHSSELVGDKCIATATSK	K	E	0.95	2.86	0.38	0	0	1	0	2	2497.21
Replete	jgi|Auran1|59020	42288.1	1	7	8	10	0.0004	0.266	AEYDESGPAIVHR	K	K	0.95	3.19	0.462	0	1	1	0	2	1443.69
Replete	jgi|Auran1|59020	42288.1	1	7	8	10	0.0004	0.266	AGFAGDDAPR	K	A	0.95	3.34	0.281	0	1	0	0	2	976.449
Replete	jgi|Auran1|59020	42288.1	1	7	8	10	0.0004	0.266	CPEVLFQPSFIGK	R	E	0.95	4.17	0.444	0	2	0	0	2	1521.78
Replete	jgi|Auran1|59020	42288.1	1	7	8	10	0.0004	0.266	DLYCNIVLSGGTTMFPGVGER	K	M	0.95	5.85	0.632	0	1	0	0	2	2302.09
Replete	jgi|Auran1|59020	42288.1	1	7	8	10	0.0004	0.266	GYSFTTTAER	R	E	0.95	3.11	0.552	0	1	0	0	2	1132.53
Replete	jgi|Auran1|59020	42288.1	1	7	8	10	0.0004	0.266	SYELPDGNVIVIGNER	K	F	0.95	5.27	0.567	0	2	0	0	2	1774.9
Replete	jgi|Auran1|59020	42288.1	1	7	8	10	0.0004	0.266	VAPEEHPVLLTEAPLNPK	R	A	0.95	3.23	0.367	0	0	1	0	2	1954.07
Replete	jgi|Auran1|68630	86188.8	1	3	3	3	0.0001	0.0442	YATMSAADVDK	K	A	0.95	2.71	0.528	0	1	0	0	2	1171.53
Replete	jgi|Auran1|68630	86188.8	1	3	3	3	0.0001	0.0442	YFAWEDAIDLSK	R	Y	0.95	4.29	0.58	0	1	0	0	2	1457.7
Replete	jgi|Auran1|68630	86188.8	1	3	3	3	0.0001	0.0442	YNVTAAYCHFGR	K	E	0.95	3.26	0.517	0	1	0	0	2	1458.66
Replete	jgi|Auran1|4875	24724.9	1	3	3	6	0.0002	0.192	FAQYTGAASIAGR	K	F	0.95	3.4	0.42	0	2	0	0	2	1312.67
Replete	jgi|Auran1|4875	24724.9	1	3	3	6	0.0002	0.192	FTPGTFTNQITK	R	Q	0.95	2.61	0.394	0	2	0	0	2	1354.7
Replete	jgi|Auran1|4875	24724.9	1	3	3	6	0.0002	0.192	VLTAIENPQDIIAISAR	R	P	0.95	3.41	0.49	0	2	0	0	1	1824.02
Replete	jgi|Auran1|66158	133587	0.998	2	2	2	0.0001	0.0239	PAEPPAAKAPR	K	L	0.95	1.62	0.338	0	1	0	0	1	1104.62
Replete	jgi|Auran1|66158	133587	0.998	2	2	2	0.0001	0.0239	QQQKEFLEAQMVDQNRSR	K	A	0.95	2.77	0.308	0	0	1	0	2	2235.09
Replete	jgi|Auran1|37496	21628.1	1	4	5	5	0.0002	0.24	AGGECLTFDQLALR	K	A	0.95	4.02	0.462	0	1	0	0	2	1550.76
Replete	jgi|Auran1|37496	21628.1	1	4	5	5	0.0002	0.24	IAVLVGTITDDPR	K	M	0.95	3.34	0.579	0	1	0	0	2	1369.77
Replete	jgi|Auran1|37496	21628.1	1	4	5	5	0.0002	0.24	IAVLVGTITDDPRMLTVPK	K	M	0.95	2.06	0.455	0	0	1	0	2	2055.15
Replete	jgi|Auran1|37496	21628.1	1	4	5	5	0.0002	0.24	TNRPPLSLSALAR	R	F	0.95	3.09	0.465	0	1	1	0	2	1395.81
Replete	jgi|Auran1|55398	27585.1	1	5	6	9	0.0003	0.238	FLEIDDEK	K	K	0.95	2.78	0.12	0	1	0	0	2	1008.49
Replete	jgi|Auran1|55398	27585.1	1	5	6	9	0.0003	0.238	FLEIDDEKK	K	L	0.95	2.74	0.233	0	1	0	0	2	1136.58
Replete	jgi|Auran1|55398	27585.1	1	5	6	9	0.0003	0.238	ISQEVDGEALGEEFAGYVFR	R	I	0.95	4.36	0.579	0	2	1	0	2	2216.05
Replete	jgi|Auran1|55398	27585.1	1	5	6	9	0.0003	0.238	LNIACPSTGAQK	K	F	0.95	3.17	0.39	0	2	0	0	2	1259.64
Replete	jgi|Auran1|55398	27585.1	1	5	6	9	0.0003	0.238	QGDADIEGLTDTPVAVR	K	L	0.95	5.78	0.491	0	2	0	0	2	1756.87
Replete	jgi|Auran1|17075	15905.1	0.998	2	2	4	0.0002	0.15	VVAYEPGESAVGIK	K	Q	0.95	2.84	0.426	0	3	0	0	2	1418.75
Replete	jgi|Auran1|17075	15905.1	0.998	2	2	4	0.0002	0.15	YPFALVDK	R	V	0.95	2.09	0.238	0	1	0	0	2	952.514
Replete	jgi|Auran1|65557	175390	0.998	2	2	2	0.0001	0.0206	ADAASGPAAAPAVAAK	K	P	0.95	3.25	0.465	0	1	0	0	1	1338.7
Replete	jgi|Auran1|65557	175390	0.998	2	2	2	0.0001	0.0206	TLGTQVPVINDVVIPNLDK	R	G	0.95	2.77	0.287	0	1	0	0	2	2035.14
Replete	jgi|Auran1|19513	34774	0.998	2	2	2	0.0001	0.113	DLEYDMSEEAGDVFK	R	R	0.95	2.44	0.368	0	1	0	0	2	1763.73
Replete	jgi|Auran1|19513	34774	0.998	2	2	2	0.0001	0.113	IFDEAIAPHSSGDITAAQMK	R	E	0.95	4.18	0.516	0	0	1	0	2	2118.02
Replete	jgi|Auran1|53446	73148	0.998	2	2	2	0.0001	0.0518	AAIGPFATPDLLIPVAGLPK	R	T	0.95	4.81	0.586	0	1	0	0	2	1961.15
Replete	jgi|Auran1|53446	73148	0.998	2	2	2	0.0001	0.0518	AITDAAVAECPLVQK	K	V	0.95	2.51	0.348	0	1	0	0	2	1585.83
Replete	jgi|Auran1|9008	9576.6	0.998	2	2	2	0.0001	0.333	MNAMSEEYTDAIFYK	K	V	0.95	4.83	0.542	0	1	0	0	2	1812.78
Replete	jgi|Auran1|9008	9576.6	0.998	2	2	2	0.0001	0.333	VIGDSSAEASSLMK	K	R	0.95	3.15	0.571	0	1	0	0	2	1394.68
Replete	jgi|Auran1|65524	228237	1	13	13	13	0.0005	0.116	AMDGYDALQGSSAEAAVGVFVDALR	K	A	0.95	2.53	0.327	0	0	1	0	2	2513.2
Replete	jgi|Auran1|65524	228237	1	13	13	13	0.0005	0.116	AMVASGGAATLADAAATVEATVR	K	A	0.95	2.06	0.366	0	1	0	0	2	2104.07
Replete	jgi|Auran1|65524	228237	1	13	13	13	0.0005	0.116	ANNIDTSWLDGILAAK	K	S	0.95	4.79	0.55	0	1	0	0	2	1701.88
Replete	jgi|Auran1|65524	228237	1	13	13	13	0.0005	0.116	EILDNAEGTGLFDK	R	G	0.95	3.89	0.0845	0	1	0	0	2	1521.74
Replete	jgi|Auran1|65524	228237	1	13	13	13	0.0005	0.116	ELTGADLEIPDISSIVEAK	K	E	0.95	5.57	0.65	0	1	0	0	2	2000.04
Replete	jgi|Auran1|65524	228237	1	13	13	13	0.0005	0.116	EQPDGTLLANFGGVSR	R	K	0.95	3.73	0.626	0	1	0	0	2	1660.83
Replete	jgi|Auran1|65524	228237	1	13	13	13	0.0005	0.116	GESGDAAASLLLAHAK	K	L	0.95	2.38	0.254	0	1	0	0	2	1510.79
Replete	jgi|Auran1|65524	228237	1	13	13	13	0.0005	0.116	IAANILAQTAK	K	V	0.95	2.58	0.307	0	1	0	0	2	1113.66
Replete	jgi|Auran1|65524	228237	1	13	13	13	0.0005	0.116	IFEEGPPTKPSGGIAQPDIFADMELK	K	A	0.95	4.99	0.472	0	0	1	0	2	2803.39
Replete	jgi|Auran1|65524	228237	1	13	13	13	0.0005	0.116	IFINVIPEVVKDDGSPMDVAR	R	L	0.95	2.9	0.255	0	0	1	0	2	2314.21
Replete	jgi|Auran1|65524	228237	1	13	13	13	0.0005	0.116	ITAENPDEGFKPTSGK	R	I	0.95	2.2	0.253	0	0	1	0	2	1690.83
Replete	jgi|Auran1|65524	228237	1	13	13	13	0.0005	0.116	SNEAAVAALLAESEK	R	A	0.95	3.38	0.311	0	1	0	0	2	1502.77
Replete	jgi|Auran1|65524	228237	1	13	13	13	0.0005	0.116	TDPVTGVATAYCDLDGSSCVVDPYPAADAVGK	K	K	0.95	5.07	0.562	0	0	1	0	2	3271.48
Replete	jgi|Auran1|26683	25819.5	0.998	2	2	4	0.0002	0.138	GGLPGYFPPIEGR	K	I	0.95	3.19	0.514	0	2	0	0	2	1359.71
Replete	jgi|Auran1|26683	25819.5	0.998	2	2	4	0.0002	0.138	GYVAGVTPQEQWDNIPLIGK	R	L	0.95	5.23	0.673	0	2	0	0	2	2185.13
Replete	jgi|Auran1|65502	128141	1	3	3	3	0.0001	0.0425	AAYADANELLGDIVK	K	V	0.95	2.22	0.244	0	1	0	0	2	1562.81
Replete	jgi|Auran1|65502	128141	1	3	3	3	0.0001	0.0425	AFVEGGDDPVGYPVIVK	R	A	0.95	4.26	0.488	0	1	0	0	2	1761.91
Replete	jgi|Auran1|65502	128141	1	3	3	3	0.0001	0.0425	AGAATTSFIGDNPELFQFK	R	A	0.95	3	0.322	0	1	0	0	2	2013.99
Replete	jgi|Auran1|64968	190576	0.998	2	2	2	0.0001	0.0156	AADAAQQAALDAVDEVK	K	R	0.95	4.4	0.589	0	1	0	0	2	1685.83
Replete	jgi|Auran1|64968	190576	0.998	2	2	2	0.0001	0.0156	AEEAAAAAQLAR	R	E	0.95	2.76	0.232	0	1	0	0	2	1171.61
Replete	jgi|Auran1|38489	17008	0.998	2	2	4	0.0002	0.185	GLTPSQIGVILR	K	D	0.95	2.42	0.409	0	1	0	0	2	1253.76
Replete	jgi|Auran1|38489	17008	0.998	2	2	4	0.0002	0.185	NGLAPEIPEDLYMLIK	K	K	0.95	3.25	0.457	0	3	0	0	2	1831.95
Replete	jgi|Auran1|7898	15884	1	4	4	5	0.0002	0.264	GFSLAELK	R	A	0.95	2.6	0.288	0	1	0	0	2	864.483
Replete	jgi|Auran1|7898	15884	1	4	4	5	0.0002	0.264	SAESLAANVAR	K	L	0.95	4.01	0.374	0	1	0	0	2	1088.57
Replete	jgi|Auran1|7898	15884	1	4	4	5	0.0002	0.264	TIGISVDSR	K	R	0.95	2.23	0.22	0	1	0	0	2	947.516
Replete	jgi|Auran1|7898	15884	1	4	4	5	0.0002	0.264	VITWFDQPAK	K	K	0.95	2.6	0.454	0	2	0	0	2	1204.64
Replete	jgi|Auran1|52275	73241	0.998	2	2	2	0.0001	0.0452	HAVVTVPAYFNDAQR	K	Q	0.95	2.78	0.314	0	0	1	0	2	1687.86
Replete	jgi|Auran1|52275	73241	0.998	2	2	2	0.0001	0.0452	VINEPTAAAIAYGLDK	R	A	0.95	3.36	0.155	0	1	0	0	2	1645.88
Replete	jgi|Auran1|24147	42771	1	4	4	5	0.0002	0.135	LSDVTEFNAAYGELPDLAATR	K	K	0.95	5.58	0.675	0	1	0	0	2	2253.1
Replete	jgi|Auran1|24147	42771	1	4	4	5	0.0002	0.135	SVLGVPDDYR	R	I	0.95	2.71	0.319	0	1	0	0	2	1120.56
Replete	jgi|Auran1|24147	42771	1	4	4	5	0.0002	0.135	TWFGDVTNQLK	K	L	0.95	3.26	0.491	0	1	0	0	2	1308.66
Replete	jgi|Auran1|24147	42771	1	4	4	5	0.0002	0.135	VPDLDWIADDR	R	T	0.95	3.49	0.553	0	2	0	0	2	1314.63
Replete	jgi|Auran1|52245	34457.1	1	9	11	22	0.0008	0.478	DGDFEVETTTLGAAEPK	K	E	0.95	3.87	0.576	0	2	0	0	2	1779.83
Replete	jgi|Auran1|52245	34457.1	1	9	11	22	0.0008	0.478	ELEAQGIEVEIVPVGTK	K	V	0.95	3.24	0.486	0	2	0	0	2	1810.98
Replete	jgi|Auran1|52245	34457.1	1	9	11	22	0.0008	0.478	EPLDLPLLENR	R	E	0.95	2.3	0.374	0	2	0	0	2	1308.72
Replete	jgi|Auran1|52245	34457.1	1	9	11	22	0.0008	0.478	FVSLIASSPSIR	K	T	0.95	3.56	0.36	0	2	0	0	2	1276.73
Replete	jgi|Auran1|52245	34457.1	1	9	11	22	0.0008	0.478	GLCGSYNTYIIK	R	K	0.95	3.84	0.481	0	1	0	0	2	1388.69
Replete	jgi|Auran1|52245	34457.1	1	9	11	22	0.0008	0.478	QAGVTQEILEIVAGATAAQG	R	-	0.95	3.84	0.568	0	2	1	0	2	1927.01
Replete	jgi|Auran1|52245	34457.1	1	9	11	22	0.0008	0.478	RGEEFPASYSCPQVPSADFASEVSR	R	E	0.95	4.15	0.617	0	0	2	0	2	2773.25
Replete	jgi|Auran1|52245	34457.1	1	9	11	22	0.0008	0.478	SLQESVASELASR	R	M	0.95	3.22	0.465	0	2	0	0	2	1376.7
Replete	jgi|Auran1|52245	34457.1	1	9	11	22	0.0008	0.478	TILPLSATGIETEGDEIFEMSTK	R	D	0.95	5.72	0.614	0	4	2	0	2	2482.23
Replete	jgi|Auran1|70159	21640.3	0.998	2	2	2	0.0001	0.166	APVNTEEGEALANELNAYK	R	Y	0.95	6	0.569	0	1	0	0	2	2032.98
Replete	jgi|Auran1|70159	21640.3	0.998	2	2	2	0.0001	0.166	YIECSALTQQGLK	K	G	0.95	4.51	0.51	0	1	0	0	2	1510.76
Replete	jgi|Auran1|72618	93270.6	1	14	14	21	0.0008	0.246	AFCQFIMSPICK	R	M	0.95	3.72	0.501	0	2	0	0	2	1517.7
Replete	jgi|Auran1|72618	93270.6	1	14	14	21	0.0008	0.246	AMADEYGWDVTDAR	R	K	0.95	3.94	0.537	0	2	0	0	2	1599.68
Replete	jgi|Auran1|72618	93270.6	1	14	14	21	0.0008	0.246	CSVLCDEQMR	K	S	0.95	3.01	0.457	0	1	0	0	2	1313.53
Replete	jgi|Auran1|72618	93270.6	1	14	14	21	0.0008	0.246	ESVGATSAQTCLSK	R	S	0.95	3.94	0.523	0	1	0	0	2	1438.68
Replete	jgi|Auran1|72618	93270.6	1	14	14	21	0.0008	0.246	ESVVAGFQWASK	R	C	0.95	3.36	0.523	0	1	0	0	2	1308.66
Replete	jgi|Auran1|72618	93270.6	1	14	14	21	0.0008	0.246	FQEQVQDIPAGNTCGLVGVDQYLLK	R	S	0.95	3.59	0.386	0	0	1	0	2	2792.39
Replete	jgi|Auran1|72618	93270.6	1	14	14	21	0.0008	0.246	GVNYLAEIR	K	E	0.95	3.52	0.167	0	1	0	0	2	1034.56
Replete	jgi|Auran1|72618	93270.6	1	14	14	21	0.0008	0.246	IMGPNYVPGK	R	K	0.95	2.63	0.211	0	1	0	0	2	1091.56
Replete	jgi|Auran1|72618	93270.6	1	14	14	21	0.0008	0.246	IWGFGPDGSGANLIYDQTK	K	G	0.95	6.21	0.619	0	1	0	0	2	2038.99
Replete	jgi|Auran1|72618	93270.6	1	14	14	21	0.0008	0.246	KEDEELVGKPLLK	K	R	0.95	3.85	0.288	0	0	2	0	2	1497.85
Replete	jgi|Auran1|72618	93270.6	1	14	14	21	0.0008	0.246	LYMEAHPLSDELADAIEDGK	R	I	0.95	5.07	0.639	0	0	3	0	2	2233.03
Replete	jgi|Auran1|72618	93270.6	1	14	14	21	0.0008	0.246	TCDTSEGAPLMMYISK	R	M	0.95	3.38	0.49	0	1	0	0	2	1803.8
Replete	jgi|Auran1|72618	93270.6	1	14	14	21	0.0008	0.246	WLPVGDAILEMIVVK	K	L	0.95	3.96	0.457	0	2	0	0	2	1698.95
Replete	jgi|Auran1|72618	93270.6	1	14	14	21	0.0008	0.246	YRVENLYDGPLDDAAANAIR	R	T	0.95	5.48	0.448	0	0	2	0	2	2236.1
Replete	jgi|Auran1|70153	35090.6	0.998	2	2	3	0.0001	0.101	IFALDEADEMLSR	K	G	0.95	2.16	0.333	0	1	0	0	2	1509.73
Replete	jgi|Auran1|70153	35090.6	0.998	2	2	3	0.0001	0.101	VALFSATMPLEVLEITSR	R	F	0.95	4.62	0.629	0	2	0	0	2	1993.07
Replete	jgi|Auran1|23580	25738.5	1	5	6	8	0.0003	0.365	ADMASVDEIK	K	A	0.95	2.13	0.244	0	1	0	0	2	1094.5
Replete	jgi|Auran1|23580	25738.5	1	5	6	8	0.0003	0.365	ETADHFGGCDVLVNNAGITK	K	D	0.95	3.55	0.35	0	0	1	0	2	2117.99
Replete	jgi|Auran1|23580	25738.5	1	5	6	8	0.0003	0.365	GVTVNAVCPGFIGTEMANELGEDMLNK	R	V	0.95	3.02	0.4	0	0	1	0	2	2866.34
Replete	jgi|Auran1|23580	25738.5	1	5	6	8	0.0003	0.365	IINMSSVVGLFGNPGQANYAAAK	R	G	0.95	5.18	0.621	0	1	2	0	2	2322.19
Replete	jgi|Auran1|23580	25738.5	1	5	6	8	0.0003	0.365	LGEADEVAGLVR	R	Y	0.95	3.67	0.368	0	2	0	0	2	1228.65
Replete	jgi|Auran1|36205	71670.7	1	12	14	21	0.0008	0.283	ATAGDTHLGGEDFDNR	K	M	0.95	3.77	0.513	0	1	1	0	2	1675.73
Replete	jgi|Auran1|36205	71670.7	1	12	14	21	0.0008	0.283	DAGSIAGLNVLR	K	I	0.95	3.3	0.336	0	1	0	0	2	1185.66
Replete	jgi|Auran1|36205	71670.7	1	12	14	21	0.0008	0.283	FEDLNMDYFR	R	K	0.95	2.72	0.464	0	2	0	0	2	1365.58
Replete	jgi|Auran1|36205	71670.7	1	12	14	21	0.0008	0.283	IINEPTAAAIAYGLDK	R	K	0.95	4.65	0.358	0	2	0	0	2	1659.9
Replete	jgi|Auran1|36205	71670.7	1	12	14	21	0.0008	0.283	ITETTSWLDANQMAEKEEYEAK	K	Q	0.95	4.04	0.521	0	0	3	0	2	2603.18
Replete	jgi|Auran1|36205	71670.7	1	12	14	21	0.0008	0.283	LSQDEIDRMVDEAER	R	Y	0.95	2.82	0.329	0	0	1	0	2	1821.83
Replete	jgi|Auran1|36205	71670.7	1	12	14	21	0.0008	0.283	NAVVTVPAYFNDSQR	K	Q	0.95	3.4	0.481	0	2	0	0	2	1680.83
Replete	jgi|Auran1|36205	71670.7	1	12	14	21	0.0008	0.283	NQVAMNAFNTVFDAK	K	R	0.95	4.15	0.553	0	3	0	0	2	1685.8
Replete	jgi|Auran1|36205	71670.7	1	12	14	21	0.0008	0.283	SINPDEAVAYGATVQAAILSGADSSEK	K	L	0.95	4.55	0.616	0	1	1	0	2	2664.3
Replete	jgi|Auran1|36205	71670.7	1	12	14	21	0.0008	0.283	SQVNEVVLVGGSTR	K	I	0.95	4.4	0.455	0	1	0	0	2	1444.78
Replete	jgi|Auran1|36205	71670.7	1	12	14	21	0.0008	0.283	TTPSYVAFNETER	R	L	0.95	3.94	0.54	0	1	0	0	2	1514.71
Replete	jgi|Auran1|36205	71670.7	1	12	14	21	0.0008	0.283	VEIIANDQGNR	R	T	0.95	3.31	0.412	0	1	0	0	2	1228.63
Replete	jgi|Auran1|29693	23415.7	0.998	2	2	2	0.0001	0.132	AFLAELYDQAVADAVR	R	I	0.95	3.97	0.487	0	1	0	0	2	1751.9
Replete	jgi|Auran1|29693	23415.7	0.998	2	2	2	0.0001	0.132	TVFKDDDAAVNKK	R	V	0.95	2.44	0.328	0	0	1	0	2	1450.75
Replete	jgi|Auran1|23507	40166.1	1	2	2	2	0.0001	0.0815	GLQSTLYLGNLDAK	R	R	0.95	3.06	0.27	0	1	0	0	2	1492.8
Replete	jgi|Auran1|23507	40166.1	1	2	2	2	0.0001	0.0815	VQAIPQTETTPFYPR	K	S	0.95	3.44	0.414	0	1	0	0	2	1747.9
Replete	jgi|Auran1|19481	17185.4	1	3	3	6	0.0002	0.244	GVTAWANVPDAGK	K	L	0.95	3.23	0.482	0	2	0	0	2	1285.65
Replete	jgi|Auran1|19481	17185.4	1	3	3	6	0.0002	0.244	LGSIPGPFGLR	R	L	0.95	3.05	0.274	0	2	0	0	2	1113.64
Replete	jgi|Auran1|19481	17185.4	1	3	3	6	0.0002	0.244	LWDPIGSMSAMDESTK	R	A	0.95	4.27	0.649	0	2	0	0	2	1799.78
Replete	jgi|Auran1|70540	26314.8	0.998	2	3	4	0.0002	0.17	GYEPGLTPPEQWDAIPLYGK	R	L	0.95	4.02	0.569	0	2	1	0	2	2231.1
Replete	jgi|Auran1|70540	26314.8	0.998	2	3	4	0.0002	0.17	VAMAAFLGYLAGSTELVSGPHK	R	I	0.95	2.96	0.391	0	0	1	0	2	2235.15
Replete	jgi|Auran1|29608	76667.8	0.999	2	3	3	0.0001	0.035	AADVGADLVGK	K	V	0.95	3	0.32	1	1	0	0	2	1015.54	jgi|Auran1|70885
Replete	jgi|Auran1|29608	76667.8	0.999	2	3	3	0.0001	0.035	SVGLAAAEMVQEVER	K	Q	0.95	2.94	0.466	0	1	0	0	2	1588.8
Replete	jgi|Auran1|24967	55161	0.998	2	2	2	0.0001	0.0499	LLEEEQESFR	K	S	0.95	1.84	0.251	0	1	0	0	2	1279.62
Replete	jgi|Auran1|24967	55161	0.998	2	2	2	0.0001	0.0499	QAGRERVMLVDIAVPR	R	N	0.95	2.66	0.278	0	1	0	0	2	1826.01
Replete	jgi|Auran1|39321	48750.9	1	4	4	4	0.0002	0.186	AEEALAFPNAFGVTVR	R	Y	0.95	3.92	0.502	0	1	0	0	2	1691.88
Replete	jgi|Auran1|39321	48750.9	1	4	4	4	0.0002	0.186	ISLSTQQLDDDFGDLVK	K	E	0.95	5.12	0.637	0	1	0	0	2	1893.95
Replete	jgi|Auran1|39321	48750.9	1	4	4	4	0.0002	0.186	LEVEPGTFLVANAGALVTTIQDVTSTK	K	G	0.946	2.16	0.247	0	0	1	0	2	2774.48
Replete	jgi|Auran1|39321	48750.9	1	4	4	4	0.0002	0.186	TNVGGPSSSFGIWHEDFDEVAAIAGK	K	H	0.95	2.75	0.211	0	0	1	0	2	2691.27
Replete	jgi|Auran1|32655	14968.4	1	3	3	3	0.0001	0.429	DGTPFWNQLFVASLR	K	D	0.95	2.96	0.292	0	1	0	0	2	1750.89
Replete	jgi|Auran1|32655	14968.4	1	3	3	3	0.0001	0.429	FLQGPGTFPGTVAELAK	R	G	0.95	4.14	0.469	0	1	0	0	2	1732.93
Replete	jgi|Auran1|32655	14968.4	1	3	3	3	0.0001	0.429	VVNYVGVQIPVAGPLPKPGDEPVPFPAK	R	E	0.95	4.19	0.559	0	0	1	0	2	2884.6
Replete	jgi|Auran1|55209	37417.3	1	6	6	10	0.0004	0.265	ANLDYDAIVR	K	N	0.95	2.99	0.397	0	2	0	0	2	1149.59
Replete	jgi|Auran1|55209	37417.3	1	6	6	10	0.0004	0.265	FIIGGPQGDAGLTGR	K	K	0.95	4.17	0.56	0	3	0	0	2	1458.77
Replete	jgi|Auran1|55209	37417.3	1	6	6	10	0.0004	0.265	GLSCDSCEVLVR	K	I	0.95	3.41	0.449	0	2	0	0	2	1394.64
Replete	jgi|Auran1|55209	37417.3	1	6	6	10	0.0004	0.265	IGFDSFVDDLGSVDSK	K	G	0.95	5.09	0.696	0	1	0	0	2	1700.8
Replete	jgi|Auran1|55209	37417.3	1	6	6	10	0.0004	0.265	TQVTIEYLQHSDGSVTPK	K	M	0.95	2.26	0.212	0	0	1	0	2	2003.01
Replete	jgi|Auran1|55209	37417.3	1	6	6	10	0.0004	0.265	VADQVSDAVLDACLTADPYSK	K	V	0.95	5.37	0.551	0	1	0	0	2	2238.06
Replete	jgi|Auran1|54676	41704.5	1	4	4	4	0.0002	0.186	EMVLGLGDSLGSLESVLDPSEPQLDPDSE	K	-	0.95	3.85	0.358	0	0	1	0	2	3044.42
Replete	jgi|Auran1|54676	41704.5	1	4	4	4	0.0002	0.186	FLEVNQEANK	K	L	0.95	2.91	0.331	0	1	0	0	2	1191.6
Replete	jgi|Auran1|54676	41704.5	1	4	4	4	0.0002	0.186	NGDILTGTVVQYDGPQK	K	A	0.95	3.14	0.519	0	1	0	0	2	1804.91
Replete	jgi|Auran1|54676	41704.5	1	4	4	4	0.0002	0.186	VEDLDATLACGMAIK	R	C	0.95	2.44	0.371	0	1	0	0	2	1622.78
Replete	jgi|Auran1|72571	28641.5	1	3	4	6	0.0002	0.177	LDGTMIGDVGFDPLR	K	L	0.95	3.67	0.508	0	3	0	0	2	1621.79
Replete	jgi|Auran1|72571	28641.5	1	3	4	6	0.0002	0.177	SQAELDDLALK	K	E	0.95	2.96	0.375	0	1	0	0	2	1202.63
Replete	jgi|Auran1|72571	28641.5	1	3	4	6	0.0002	0.177	TYGDTPWDLGFDPLCFQEGK	K	S	0.95	4.71	0.559	0	1	1	0	2	2346.04
Replete	jgi|Auran1|26536	52680.8	1	3	3	3	0.0001	0.119	GTLGGTCLNVGCIPSK	R	A	0.95	3.41	0.426	0	1	0	0	2	1633.8
Replete	jgi|Auran1|26536	52680.8	1	3	3	3	0.0001	0.119	TEEQLKDEGVDYVVGSFPFSANSR	K	A	0.95	3.22	0.352	0	0	1	0	2	2674.26
Replete	jgi|Auran1|26536	52680.8	1	3	3	3	0.0001	0.119	VTVVEYLGNIVPGVDKEVGK	K	A	0.95	3.45	0.447	0	0	1	0	2	2115.17
Replete	jgi|Auran1|52186	25269.8	0.998	2	2	2	0.0001	0.11	LVCINADGVER	R	E	0.95	2.57	0.368	0	1	0	0	2	1245.63
Replete	jgi|Auran1|52186	25269.8	0.998	2	2	2	0.0001	0.11	SGSAADTQAVSDYVR	R	H	0.95	4.96	0.6	0	1	0	0	2	1526.71
Replete	jgi|Auran1|64802	19752.4	0.998	2	2	2	0.0001	0.169	LVAGAAGIMPSVCDK	R	V	0.95	3.66	0.435	0	1	0	0	2	1504.75
Replete	jgi|Auran1|64802	19752.4	0.998	2	2	2	0.0001	0.169	VFDDVQAQGGCNDDNGK	K	G	0.95	5.19	0.64	0	1	0	0	2	1838.76
Replete	jgi|Auran1|72529	103656	1	11	11	19	0.0007	0.162	CTVGLDVASSEFK	K	V	0.95	3.86	0.542	0	1	0	0	2	1412.67
Replete	jgi|Auran1|72529	103656	1	11	11	19	0.0007	0.162	DGGSLFMGK	R	G	0.95	2.07	0.359	0	1	0	0	2	911.43
Replete	jgi|Auran1|72529	103656	1	11	11	19	0.0007	0.162	IDEAMFALDGTPNK	K	A	0.95	3.28	0.363	0	2	0	0	2	1537.72
Replete	jgi|Auran1|72529	103656	1	11	11	19	0.0007	0.162	IEESLDSPK	R	L	0.95	1.66	0.125	1	0	0	0	2	1017.51
Replete	jgi|Auran1|72529	103656	1	11	11	19	0.0007	0.162	ISADYPIVTIEDPFDQDDWDNWTK	K	I	0.95	3.98	0.398	0	0	1	0	2	2883.3
Replete	jgi|Auran1|72529	103656	1	11	11	19	0.0007	0.162	LSGDELLAMYAK	K	I	0.95	3.66	0.553	0	3	0	0	2	1310.67
Replete	jgi|Auran1|72529	103656	1	11	11	19	0.0007	0.162	SCNCLLLK	K	V	0.95	2.32	0.194	0	1	0	0	2	1007.5
Replete	jgi|Auran1|72529	103656	1	11	11	19	0.0007	0.162	SGETEDDYIADLAVGLCTGEIK	R	T	0.95	5.9	0.671	0	1	0	0	2	2356.09
Replete	jgi|Auran1|72529	103656	1	11	11	19	0.0007	0.162	VDGENAYDLDFK	K	T	0.95	3.99	0.549	0	1	0	0	2	1385.62
Replete	jgi|Auran1|72529	103656	1	11	11	19	0.0007	0.162	VNQIGSISESIQAVIDSK	K	R	0.95	5.64	0.674	0	4	0	0	2	1888
Replete	jgi|Auran1|72529	103656	1	11	11	19	0.0007	0.162	VQIVGDDLTVTNPAK	K	I	0.95	5.13	0.602	0	3	0	0	2	1569.85
Replete	jgi|Auran1|72519	62137.6	1	5	7	15	0.0006	0.0935	DAVYSPYSVYGK	K	L	0.95	2.65	0.439	0	2	0	0	2	1348.64
Replete	jgi|Auran1|72519	62137.6	1	5	7	15	0.0006	0.0935	FYQDMEEVNLLSK	K	R	0.95	4.38	0.62	0	3	0	0	2	1615.77
Replete	jgi|Auran1|72519	62137.6	1	5	7	15	0.0006	0.0935	GTMNYLAAASGKPEATAAAK	R	K	0.95	5.23	0.549	0	3	3	0	2	1938.96
Replete	jgi|Auran1|72519	62137.6	1	5	7	15	0.0006	0.0935	KFYQDMEEVNLLSK	K	R	0.95	4.39	0.498	0	2	1	0	2	1759.86
Replete	jgi|Auran1|72519	62137.6	1	5	7	15	0.0006	0.0935	YNDKEVAFK	K	K	0.95	2.26	0.384	0	1	0	0	2	1113.56
Replete	jgi|Auran1|71945	140963	0.998	2	2	2	0.0001	0.0237	AYAGETYESAYATALSYVLK	K	I	0.95	6.06	0.711	0	1	0	0	2	2171.05
Replete	jgi|Auran1|71945	140963	0.998	2	2	2	0.0001	0.0237	VYTVETYESSK	K	A	0.95	3.7	0.506	0	1	0	0	2	1305.62
Replete	jgi|Auran1|70003	15897.4	1	5	5	7	0.0003	0.399	ADRDEASPYAAMLAAQDVAER	K	C	0.95	4.18	0.516	0	0	2	0	2	2266.04
Replete	jgi|Auran1|70003	15897.4	1	5	5	7	0.0003	0.399	IEDVTPIPSDSTR	R	R	0.95	3.94	0.501	0	2	0	0	2	1429.72
Replete	jgi|Auran1|70003	15897.4	1	5	5	7	0.0003	0.399	KTEEIKEVTTLGPK	K	V	0.95	3.08	0.285	0	0	1	0	2	1572.89
Replete	jgi|Auran1|70003	15897.4	1	5	5	7	0.0003	0.399	TEEIKEVTTLGPK	K	V	0.95	2.71	0.349	0	1	0	0	2	1444.79
Replete	jgi|Auran1|70003	15897.4	1	5	5	7	0.0003	0.399	TPGPGAQSALR	K	A	0.95	3.18	0.405	0	1	0	0	2	1054.56
Replete	jgi|Auran1|18886	15308.6	1	5	6	9	0.0003	0.243	EIAQDFK	R	T	0.95	2.1	0.0503	1	0	0	0	2	850.431
Replete	jgi|Auran1|18886	15308.6	1	5	6	9	0.0003	0.243	EIAQDFKTDLR	R	F	0.95	3.22	0.376	0	1	0	0	2	1335.69
Replete	jgi|Auran1|18886	15308.6	1	5	6	9	0.0003	0.243	STELLVR	K	K	0.95	1.97	0.15	3	2	0	0	2	817.478
Replete	jgi|Auran1|18886	15308.6	1	5	6	9	0.0003	0.243	VTIMPK	R	D	0.95	1.99	0.22	1	0	0	0	2	688.407
Replete	jgi|Auran1|18886	15308.6	1	5	6	9	0.0003	0.243	YRPGTVALR	R	E	0.95	2.45	0.287	0	1	0	0	2	1032.6
Replete	jgi|Auran1|71916	259116	1	10	10	10	0.0004	0.0786	APSASYQCLSCK	K	E	0.95	3.6	0.549	0	1	0	0	2	1371.6
Replete	jgi|Auran1|71916	259116	1	10	10	10	0.0004	0.0786	DFAYDVPWDLVAATAYK	R	G	0.95	5.18	0.597	0	1	0	0	2	1944.94
Replete	jgi|Auran1|71916	259116	1	10	10	10	0.0004	0.0786	DQNGLMVVQLCR	R	G	0.95	2.31	0.276	0	1	0	0	2	1432.7
Replete	jgi|Auran1|71916	259116	1	10	10	10	0.0004	0.0786	ESSGSTDTFFVDETLKPADQCVDSPVWR	K	A	0.95	4.28	0.424	0	0	1	0	2	3173.44
Replete	jgi|Auran1|71916	259116	1	10	10	10	0.0004	0.0786	IAAYYDSLAENGLGECDGAVLLASAVK	R	V	0.95	2.7	0.363	0	0	1	0	2	2770.36
Replete	jgi|Auran1|71916	259116	1	10	10	10	0.0004	0.0786	SQGGWDDETNSVIINPDLDALIATK	R	I	0.95	3.01	0.269	0	0	1	0	2	2672.31
Replete	jgi|Auran1|71916	259116	1	10	10	10	0.0004	0.0786	TEDLASTTAAYVAPVLVIGEYVEVTPK	K	T	0.95	4.07	0.576	0	0	1	0	2	2836.49
Replete	jgi|Auran1|71916	259116	1	10	10	10	0.0004	0.0786	VTTTVSGLTCQK	K	W	0.95	2.65	0.293	0	1	0	0	2	1294.67
Replete	jgi|Auran1|71916	259116	1	10	10	10	0.0004	0.0786	VVDALNEGDDYER	R	F	0.95	3.51	0.491	0	1	0	0	2	1494.67
Replete	jgi|Auran1|71916	259116	1	10	10	10	0.0004	0.0786	VVTFTIPEGIAPGDDYR	K	F	0.95	3.31	0.454	0	1	0	0	2	1849.93
Replete	jgi|Auran1|67892	60291.1	1	7	7	11	0.0004	0.194	AAAPAPAPEPAAKPVK	K	A	0.95	2.93	0.308	0	1	0	0	2	1485.84
Replete	jgi|Auran1|67892	60291.1	1	7	7	11	0.0004	0.194	AAPAASSGPPNVAAIAVGAAPFAALPVFGLVGLR	K	S	0.95	5.94	0.584	0	0	1	0	2	3100.73
Replete	jgi|Auran1|67892	60291.1	1	7	7	11	0.0004	0.194	AAVAPPPPPPPAPVAAK	K	A	0.95	2.58	0.183	0	0	1	0	2	1547.9
Replete	jgi|Auran1|67892	60291.1	1	7	7	11	0.0004	0.194	DAALAALSK	K	R	0.95	2.19	0.239	1	0	0	0	2	859.489
Replete	jgi|Auran1|67892	60291.1	1	7	7	11	0.0004	0.194	GGLGQLNPFETK	R	A	0.95	3.65	0.502	0	2	0	0	2	1260.66
Replete	jgi|Auran1|67892	60291.1	1	7	7	11	0.0004	0.194	GPGFSLPSLPAAAPK	K	K	0.95	2.85	0.435	0	3	0	0	2	1409.78
Replete	jgi|Auran1|67892	60291.1	1	7	7	11	0.0004	0.194	TVESFAIPAEESVTPPTK	K	V	0.95	3.64	0.553	0	2	0	0	2	1902.97
Replete	jgi|Auran1|30589	23553.6	1	5	6	8	0.0003	0.349	CDGYILEGPELAFYK	R	R	0.95	5.31	0.557	0	1	0	0	2	1774.84
Replete	jgi|Auran1|30589	23553.6	1	5	6	8	0.0003	0.349	ILDVVYNSTNNELVR	R	T	0.95	4.63	0.545	0	2	0	0	2	1748.92
Replete	jgi|Auran1|30589	23553.6	1	5	6	8	0.0003	0.349	LESGNYSWGSEVCTR	R	K	0.95	5.08	0.57	0	1	0	0	2	1744.76
Replete	jgi|Auran1|30589	23553.6	1	5	6	8	0.0003	0.349	LLAVVSSRPGQSGR	R	C	0.95	2.36	0.239	0	1	1	0	2	1426.81
Replete	jgi|Auran1|30589	23553.6	1	5	6	8	0.0003	0.349	SLESTLDDQFASGR	R	L	0.95	4.77	0.601	0	2	0	0	2	1525.71
Replete	jgi|Auran1|20379	17566	1	6	6	7	0.0003	0.403	AGELTADEVEK	R	L	0.95	3.09	0.351	0	1	0	0	2	1161.56
Replete	jgi|Auran1|20379	17566	1	6	6	7	0.0003	0.403	IPAWFLNR	K	Q	0.95	2.9	0.462	0	1	0	0	2	1016.57
Replete	jgi|Auran1|20379	17566	1	6	6	7	0.0003	0.403	LVAIIQNPK	K	Q	0.95	2.61	0.269	0	1	0	0	2	995.625
Replete	jgi|Auran1|20379	17566	1	6	6	7	0.0003	0.403	VLNTNIDGR	R	R	0.95	2.95	0.339	0	1	0	0	2	1001.54
Replete	jgi|Auran1|20379	17566	1	6	6	7	0.0003	0.403	VMFALTSIPGVGR	K	R	0.95	2.3	0.263	0	1	0	0	2	1347.75
Replete	jgi|Auran1|20379	17566	1	6	6	7	0.0003	0.403	YSQAFANTLQQK	K	L	0.95	3.58	0.526	0	2	0	0	2	1398.7
Replete	jgi|Auran1|30567	16100.5	1	4	5	8	0.0003	0.329	ALVAYYQK	K	Y	0.95	2.3	0.239	0	1	0	0	2	955.525
Replete	jgi|Auran1|30567	16100.5	1	4	5	8	0.0003	0.329	GGGFTAQIYAIR	K	Q	0.95	3.21	0.408	0	1	0	0	2	1253.66
Replete	jgi|Auran1|30567	16100.5	1	4	5	8	0.0003	0.329	TFEPVLLLGQHR	K	F	0.95	3.12	0.393	0	1	1	0	2	1409.79
Replete	jgi|Auran1|30567	16100.5	1	4	5	8	0.0003	0.329	VNGCPIELLEPEILR	K	L	0.95	4.45	0.466	0	4	0	0	2	1751.94
Replete	Promega trypsin artifact 5 K to R mods (2239.1, 2914)(1987, 2003)	5542.5	0.998	2	3	8	0.0003	1	IITHPNFNGNTLDNDIMLIRLSSPATLNSR	R	-	0.95	4.61	0.573	0	0	5	0	2	3337.73
Replete	Promega trypsin artifact 5 K to R mods (2239.1, 2914)(1987, 2003)	5542.5	0.998	2	3	8	0.0003	1	LGEHNIDVLEGNEQFINAAR	-	I	0.95	5.84	0.46	0	1	2	0	2	2239.11
Replete	Promega trypsin artifact 5 K to R mods (2239.1, 2914)(1987, 2003)	5542.5	0.998	2	3	8	0.0003	1	LSSPATLNSR	R	-	0.95	2.55	0.382	0	3	0	0	2	1045.56	gi|136429|
Replete	jgi|Auran1|60769	120118	0.998	2	2	2	0.0001	0.0242	LVGAWQLGAATVLAR	R	D	0.95	3.29	0.51	0	1	0	0	2	1525.89
Replete	jgi|Auran1|60769	120118	0.998	2	2	2	0.0001	0.0242	WALTEAEGLGAPK	K	H	0.95	3.18	0.455	0	1	0	0	2	1342.7
Replete	jgi|Auran1|4272	26750.2	0.998	2	2	2	0.0001	0.116	AYIDIAEVAPIGGGLAK	R	L	0.95	3.43	0.498	0	1	0	0	2	1657.92
Replete	jgi|Auran1|4272	26750.2	0.998	2	2	2	0.0001	0.116	LWVADVEQYDK	K	V	0.95	2.94	0.467	0	1	0	0	2	1365.67
Replete	jgi|Auran1|27009	27009.4	1	3	3	4	0.0002	0.19	AAMLGIFGFLAESK	R	V	0.95	4.49	0.576	0	1	0	0	2	1470.77
Replete	jgi|Auran1|27009	27009.4	1	3	3	4	0.0002	0.19	FPSFAEAYK	K	E	0.95	2.41	0.314	0	1	0	0	2	1059.52
Replete	jgi|Auran1|27009	27009.4	1	3	3	4	0.0002	0.19	MTLGGADWPTGSPAEQWDALPAASK	K	W	0.95	4.6	0.472	0	0	2	0	2	2557.2
Replete	jgi|Auran1|69937	28726.2	1	3	4	5	0.0002	0.204	AGIFNDLGSGSNVDVTIIR	R	A	0.95	2.66	0.274	0	1	0	0	2	1948.01
Replete	jgi|Auran1|69937	28726.2	1	3	4	5	0.0002	0.204	ALIPPAAATAVLSTVVSVSDADAMEL	K	-	0.95	3.76	0.495	0	1	2	0	2	2528.32
Replete	jgi|Auran1|69937	28726.2	1	3	4	5	0.0002	0.204	GYETPNDTAPLR	R	A	0.95	3.25	0.506	0	1	0	0	2	1333.64
Replete	jgi|Auran1|38382	19515.3	0.998	2	2	4	0.0002	0.159	LILNCCVGESGDR	K	L	0.95	3.21	0.333	0	2	0	0	2	1492.69
Replete	jgi|Auran1|38382	19515.3	0.998	2	2	4	0.0002	0.159	VLEQLTGQEPVYSK	R	A	0.95	3.82	0.619	0	2	0	0	2	1590.84
Replete	jgi|Auran1|7695	14989.4	0.998	2	2	2	0.0001	0.0923	AIVGTSADDIK	R	K	0.95	2.43	0.325	0	1	0	0	2	1089.58
Replete	jgi|Auran1|7695	14989.4	0.998	2	2	2	0.0001	0.0923	AIVGTSADDIKK	R	L	0.95	2.28	0.396	0	1	0	0	2	1217.67
Replete	jgi|Auran1|64743	148959	1	5	5	6	0.0002	0.0611	ALIELTSGPNQVK	K	Q	0.95	3.76	0.389	0	1	0	0	2	1369.77
Replete	jgi|Auran1|64743	148959	1	5	5	6	0.0002	0.0611	EALASFEGTLVQGGAIR	K	S	0.95	4.22	0.449	0	1	0	0	2	1718.91
Replete	jgi|Auran1|64743	148959	1	5	5	6	0.0002	0.0611	NPFYAVIQTPDPATTIR	K	V	0.95	4.89	0.533	0	1	0	0	2	1903.99
Replete	jgi|Auran1|64743	148959	1	5	5	6	0.0002	0.0611	TVAVYNTNAGEFPFEACVADTGLGK	K	A	0.95	4.12	0.488	0	0	1	0	2	2631.24
Replete	jgi|Auran1|64743	148959	1	5	5	6	0.0002	0.0611	VINQNTVEFPFEAK	R	V	0.95	3.93	0.541	0	2	0	0	2	1635.84
Replete	jgi|Auran1|36610	39520.4	1	20	32	140	0.0054	0.614	ALNDAYGIDEGLMTTVHAMTATQK	K	V	0.95	4.4	0.578	0	1	12	0	2	2567.21
Replete	jgi|Auran1|36610	39520.4	1	20	32	140	0.0054	0.614	AVSCASCTTNGLAPMVK	K	A	0.95	3.78	0.616	0	9	0	0	2	1782.82
Replete	jgi|Auran1|36610	39520.4	1	20	32	140	0.0054	0.614	CASGNIIPSSTGAAK	R	A	0.95	4.16	0.516	0	4	0	0	2	1433.71
Replete	jgi|Auran1|36610	39520.4	1	20	32	140	0.0054	0.614	DDSPTVVMGVNEETYDSAMK	K	A	0.95	5.68	0.693	0	7	2	0	2	2187.94
Replete	jgi|Auran1|36610	39520.4	1	20	32	140	0.0054	0.614	DPAEIPFSAMGAEYICESTGAFLTAEK	R	V	0.95	4.91	0.692	0	1	3	0	2	2905.33
Replete	jgi|Auran1|36610	39520.4	1	20	32	140	0.0054	0.614	ETSYEEICAEIQK	K	R	0.95	4.78	0.551	0	6	1	0	2	1599.72
Replete	jgi|Auran1|36610	39520.4	1	20	32	140	0.0054	0.614	ETSYEEICAEIQKR	K	A	0.95	4.22	0.518	0	1	1	0	2	1755.82
Replete	jgi|Auran1|36610	39520.4	1	20	32	140	0.0054	0.614	IDGVLTPTSHTR	K	D	0.95	3.17	0.443	0	2	2	0	2	1296.69
Replete	jgi|Auran1|36610	39520.4	1	20	32	140	0.0054	0.614	IIFSAPAK	K	D	0.95	2.08	0.213	0	1	0	0	2	846.509
Replete	jgi|Auran1|36610	39520.4	1	20	32	140	0.0054	0.614	IIFSAPAKDDSPTVVMGVNEETYDSAMK	K	A	0.95	7.69	0.679	0	0	11	0	2	3047.42
Replete	jgi|Auran1|36610	39520.4	1	20	32	140	0.0054	0.614	KIIFSAPAK	K	D	0.95	2.81	0.345	0	1	0	0	2	974.604
Replete	jgi|Auran1|36610	39520.4	1	20	32	140	0.0054	0.614	KIIFSAPAKDDSPTVVMGVNEETYDSAMK	K	A	0.95	7.88	0.61	0	0	3	0	2	3175.52
Replete	jgi|Auran1|36610	39520.4	1	20	32	140	0.0054	0.614	LVNSGASNEYMAYQFK	K	Y	0.95	4.62	0.59	0	11	3	0	2	1837.84
Replete	jgi|Auran1|36610	39520.4	1	20	32	140	0.0054	0.614	TVAWYDNEWGYSNR	K	V	0.95	5.08	0.616	0	7	1	0	2	1760.77
Replete	jgi|Auran1|36610	39520.4	1	20	32	140	0.0054	0.614	VIPDVAGK	K	L	0.95	1.65	0.269	1	0	0	0	2	798.473
Replete	jgi|Auran1|36610	39520.4	1	20	32	140	0.0054	0.614	VPTADVSVVDLTCLLSK	R	E	0.95	5.45	0.7	0	22	1	0	2	1816.97
Replete	jgi|Auran1|36610	39520.4	1	20	32	140	0.0054	0.614	VVDASSNKDWR	K	G	0.95	2.62	0.442	0	1	1	0	2	1276.63
Replete	jgi|Auran1|36610	39520.4	1	20	32	140	0.0054	0.614	VVDLMCHMAAVDLK	R	V	0.95	2.91	0.436	0	7	3	0	2	1601.79
Replete	jgi|Auran1|36610	39520.4	1	20	32	140	0.0054	0.614	YPGTVEATDDGLK	R	I	0.95	3.79	0.547	0	7	0	0	2	1365.65
Replete	jgi|Auran1|36610	39520.4	1	20	32	140	0.0054	0.614	YPGTVEATDDGLKIDGVLTPTSHTR	R	D	0.95	7.87	0.615	0	1	6	0	2	2643.33
Replete	jgi|Auran1|54518	26778.9	0.998	2	2	2	0.0001	0.102	GGVPGYYPPIK	K	G	0.95	2.25	0.357	0	1	0	0	2	1147.62
Replete	jgi|Auran1|54518	26778.9	0.998	2	2	2	0.0001	0.102	LAMIGLFSFLAEAR	R	V	0.95	3.32	0.417	0	1	0	0	2	1554.84
Replete	jgi|Auran1|15689	20261.2	1	3	3	7	0.0003	0.291	ALTCELQNGR	R	A	0.95	3.45	0.333	0	4	0	0	2	1161.57	jgi|Auran1|59964,jgi|Auran1|59955,jgi|Auran1|60145
Replete	jgi|Auran1|15689	20261.2	1	3	3	7	0.0003	0.291	APVDTTADIGVDPGPIEPTGLFFEDKESLAR	R	R	0.95	3.93	0.51	0	0	1	0	2	3257.62
Replete	jgi|Auran1|15689	20261.2	1	3	3	7	0.0003	0.291	FADIGTGFAAIENIPK	K	F	0.95	5.45	0.598	0	2	0	0	2	1663.87
Replete	jgi|Auran1|68367	23743.7	1	5	7	19	0.0007	0.186	ADSVLGVK	K	I	0.95	1.67	0.304	1	0	0	0	2	788.452
Replete	jgi|Auran1|68367	23743.7	1	5	7	19	0.0007	0.186	DVLTGDSATLDK	R	L	0.95	3.02	0.508	1	2	0	0	2	1234.62
Replete	jgi|Auran1|68367	23743.7	1	5	7	19	0.0007	0.186	EIADMLNAVR	K	G	0.95	2.8	0.299	0	5	0	0	2	1131.58
Replete	jgi|Auran1|68367	23743.7	1	5	7	19	0.0007	0.186	GPVQSMLLDPVK	R	K	0.95	3.42	0.472	0	3	0	0	2	1283.7
Replete	jgi|Auran1|68367	23743.7	1	5	7	19	0.0007	0.186	GPVQSMLLDPVKK	R	W	0.95	3.92	0.378	0	4	3	0	2	1411.8
Replete	jgi|Auran1|24154	20027.2	0.998	2	2	5	0.0002	0.124	FPGYLSK	K	H	0.95	1.6	0.23	1	0	0	0	2	811.436
Replete	jgi|Auran1|24154	20027.2	0.998	2	2	5	0.0002	0.124	VAMAAFVGYLVPEVYK	R	F	0.95	4.42	0.684	0	4	0	0	2	1772.93
Replete	jgi|Auran1|71821	121031	1	11	12	13	0.0005	0.135	AVGSAQNVSLVNTVLNTITAAAFK	R	K	0.95	5.77	0.615	0	1	1	0	2	2389.31
Replete	jgi|Auran1|71821	121031	1	11	12	13	0.0005	0.135	DILAGETDGSSYPNGGLR	K	G	0.95	4.99	0.653	0	1	0	0	2	1821.86
Replete	jgi|Auran1|71821	121031	1	11	12	13	0.0005	0.135	GAVAESYLSK	K	Q	0.95	2.3	0.281	0	1	0	0	2	1024.53
Replete	jgi|Auran1|71821	121031	1	11	12	13	0.0005	0.135	GDCIFIPSTLCSYYGDALDEK	R	T	0.95	5.17	0.61	0	1	0	0	2	2424.07
Replete	jgi|Auran1|71821	121031	1	11	12	13	0.0005	0.135	GKDILAGETDGSSYPNGGLR	K	G	0.95	2.66	0.295	0	0	1	0	2	2006.98
Replete	jgi|Auran1|71821	121031	1	11	12	13	0.0005	0.135	HGLVGQVQNAFFK	R	F	0.95	3.55	0.557	0	1	0	0	2	1444.77
Replete	jgi|Auran1|71821	121031	1	11	12	13	0.0005	0.135	IDSGVEAICR	R	Y	0.95	3.98	0.401	0	1	0	0	2	1119.55
Replete	jgi|Auran1|71821	121031	1	11	12	13	0.0005	0.135	MAIASPGNDFR	R	L	0.95	2.67	0.151	0	1	0	0	2	1194.56
Replete	jgi|Auran1|71821	121031	1	11	12	13	0.0005	0.135	NTALFEEMGVLR	K	A	0.95	3.55	0.428	0	2	0	0	2	1395.69
Replete	jgi|Auran1|71821	121031	1	11	12	13	0.0005	0.135	QGLAAGTLDNSEWTK	K	D	0.95	4.37	0.563	0	1	0	0	2	1590.78
Replete	jgi|Auran1|71821	121031	1	11	12	13	0.0005	0.135	VVFNGDNYDEANQDMLTK	K	R	0.95	5.73	0.69	0	1	0	0	2	2088.92
Replete	jgi|Auran1|23304	41242.5	0.998	2	2	4	0.0002	0.0882	AVETLTGALFQRPPLISAVK	R	R	0.95	2.89	0.505	0	0	1	0	2	2111.22
Replete	jgi|Auran1|23304	41242.5	0.998	2	2	4	0.0002	0.0882	VVMPLEVLLTSFK	R	R	0.95	2.54	0.473	0	3	0	0	2	1475.85
Replete	jgi|Auran1|72133	78528.1	0.998	2	2	3	0.0001	0.0397	ATDGLPLNFGFSGK	K	G	0.95	2.8	0.37	0	1	0	0	2	1423.72
Replete	jgi|Auran1|72133	78528.1	0.998	2	2	3	0.0001	0.0397	GPLPEDADAGDDNTR	R	V	0.95	3.44	0.62	0	2	0	0	2	1542.67
Replete	jgi|Auran1|59843	14334.8	1	3	5	9	0.0003	0.243	AGLQFPVGR	K	L	0.95	3.12	0.218	1	1	0	0	2	944.532
Replete	jgi|Auran1|59843	14334.8	1	3	5	9	0.0003	0.243	ATIAGGGVIPHIHK	K	S	0.95	4.03	0.471	0	3	0	0	2	1370.79
Replete	jgi|Auran1|59843	14334.8	1	3	5	9	0.0003	0.243	GDEELDTLIK	R	A	0.95	3.11	0.434	1	3	0	0	2	1132.57
Replete	jgi|Auran1|22193	13246.2	1	3	4	9	0.0003	0.354	AGLQFPVAR	K	L	0.95	2.95	0.235	0	6	0	0	2	958.548
Replete	jgi|Auran1|22193	13246.2	1	3	4	9	0.0003	0.354	HLQLAVR	R	N	0.95	1.73	0.256	1	1	0	0	2	836.511
Replete	jgi|Auran1|22193	13246.2	1	3	4	9	0.0003	0.354	VGVGAGVYMGAVLEYLCAEILELAGNAAR	R	D	0.95	4.91	0.518	0	0	1	0	2	2982.51
Replete	jgi|Auran1|24196	47378.1	1	8	8	8	0.0003	0.295	AIDNLCIDLDGTPNK	R	A	0.95	3.38	0.515	0	1	0	0	2	1658.81
Replete	jgi|Auran1|24196	47378.1	1	8	8	8	0.0003	0.295	AIEEDACNALLLK	R	V	0.95	2.7	0.236	0	1	0	0	2	1459.75
Replete	jgi|Auran1|24196	47378.1	1	8	8	8	0.0003	0.295	ANLGANAILGVSLAAAK	K	A	0.95	3.07	0.405	0	1	0	0	2	1553.9
Replete	jgi|Auran1|24196	47378.1	1	8	8	8	0.0003	0.295	ATVQSVGDDITVTNPSR	R	I	0.95	4.88	0.465	0	1	0	0	2	1759.88
Replete	jgi|Auran1|24196	47378.1	1	8	8	8	0.0003	0.295	IESELGDDAVYAGK	R	T	0.95	4.16	0.582	0	1	0	0	2	1466.7
Replete	jgi|Auran1|24196	47378.1	1	8	8	8	0.0003	0.295	NVNEVLGPAVCGMDAADQR	K	A	0.95	1.71	0.375	0	1	0	0	2	2031.92
Replete	jgi|Auran1|24196	47378.1	1	8	8	8	0.0003	0.295	VDGEDCYDLGTFYPADERDDPK	K	L	0.95	4.28	0.543	0	0	1	0	2	2577.07
Replete	jgi|Auran1|24196	47378.1	1	8	8	8	0.0003	0.295	VNQIGSVSESIDAVK	K	M	0.95	4.43	0.501	0	1	0	0	2	1545.81
Replete	jgi|Auran1|20268	120590	0.998	2	2	2	0.0001	0.0254	IDATVDALSSEALR	K	V	0.95	3	0.216	0	1	0	0	2	1460.76
Replete	jgi|Auran1|20268	120590	0.998	2	2	2	0.0001	0.0254	VNEMLLTGESEDVSK	K	T	0.95	3.25	0.439	0	1	0	0	2	1666.78
Replete	jgi|Auran1|37153	87541.7	1	7	7	7	0.0003	0.109	ADLVANLGTVAK	K	S	0.95	2.55	0.351	0	1	0	0	2	1171.67
Replete	jgi|Auran1|37153	87541.7	1	7	7	7	0.0003	0.109	DASDVDDEEYR	R	S	0.95	3.49	0.345	0	1	0	0	2	1313.51
Replete	jgi|Auran1|37153	87541.7	1	7	7	7	0.0003	0.109	FLAVSDAAALDTK	R	K	0.95	3.58	0.484	0	1	0	0	2	1321.7
Replete	jgi|Auran1|37153	87541.7	1	7	7	7	0.0003	0.109	GVVDSDDLPLNVSR	R	E	0.95	4.23	0.529	0	1	0	0	2	1485.76
Replete	jgi|Auran1|37153	87541.7	1	7	7	7	0.0003	0.109	LGIIEDSANR	K	S	0.95	3.69	0.429	0	1	0	0	2	1087.57
Replete	jgi|Auran1|37153	87541.7	1	7	7	7	0.0003	0.109	LMDIIINSLYK	R	N	0.95	3.03	0.194	0	1	0	0	2	1338.73
Replete	jgi|Auran1|37153	87541.7	1	7	7	7	0.0003	0.109	VLITDEFEDLVPR	K	Y	0.95	2.25	0.359	0	1	0	0	2	1545.82
Replete	jgi|Auran1|10068	109040	1	13	13	14	0.0005	0.2	DYNNYQIDTTYYSQGSGNYR	R	D	0.95	5.59	0.637	0	0	1	0	2	2422.02
Replete	jgi|Auran1|10068	109040	1	13	13	14	0.0005	0.2	EPLGFTDYETLAAADEVK	R	V	0.95	3.35	0.553	0	1	0	0	2	1968.94
Replete	jgi|Auran1|10068	109040	1	13	13	14	0.0005	0.2	GGYPEFLGDPENPK	R	V	0.95	2.8	0.356	0	1	0	0	2	1519.71
Replete	jgi|Auran1|10068	109040	1	13	13	14	0.0005	0.2	ILYYTVPGEDFPALVR	R	R	0.95	3.04	0.591	0	1	0	0	2	1852.99
Replete	jgi|Auran1|10068	109040	1	13	13	14	0.0005	0.2	LAQPFFSVDDDAADR	K	T	0.95	3.49	0.52	0	1	0	0	2	1666.77
Replete	jgi|Auran1|10068	109040	1	13	13	14	0.0005	0.2	LFDEFWTAMETGAPYNMDVDTYGR	K	S	0.95	2.98	0.358	0	0	1	0	2	2861.21
Replete	jgi|Auran1|10068	109040	1	13	13	14	0.0005	0.2	LFFSGDEVK	R	L	0.95	2.64	0.164	0	1	0	0	2	1041.53
Replete	jgi|Auran1|10068	109040	1	13	13	14	0.0005	0.2	QYNSVYDDPAK	R	L	0.95	3.05	0.408	0	1	0	0	2	1299.59
Replete	jgi|Auran1|10068	109040	1	13	13	14	0.0005	0.2	TVEQLTGDIAPK	K	A	0.95	2.27	0.253	0	1	0	0	2	1271.69
Replete	jgi|Auran1|10068	109040	1	13	13	14	0.0005	0.2	VFPLFLEGPVR	K	Q	0.95	2.38	0.405	0	1	0	0	2	1273.73
Replete	jgi|Auran1|10068	109040	1	13	13	14	0.0005	0.2	VTITNLEDTEAAVDVVDGLAR	R	L	0.95	3.64	0.316	0	0	1	0	2	2201.13
Replete	jgi|Auran1|10068	109040	1	13	13	14	0.0005	0.2	VVQSDTANPLFDAFSR	R	Q	0.95	5.67	0.648	0	2	0	0	2	1766.87
Replete	jgi|Auran1|10068	109040	1	13	13	14	0.0005	0.2	YAEAVALAER	K	L	0.95	3.72	0.265	0	1	0	0	2	1092.57
Replete	jgi|Auran1|37129	48966.5	0.998	2	2	2	0.0001	0.0645	EFEEAGLDESK	R	H	0.95	2.66	0.462	0	1	0	0	2	1253.55
Replete	jgi|Auran1|37129	48966.5	0.998	2	2	2	0.0001	0.0645	HGGSAYGIDFK	K	E	0.95	2.5	0.329	0	1	0	0	2	1151.55
Replete	jgi|Auran1|37129	48966.5	0.998	2	2	2	0.0001	0.0645	NAQNILLK	K	N	0.95	2.21	0.189	0	1	0	0	2	913.547	jgi|Auran1|18463
Replete	jgi|Auran1|55034	28628.7	0.998	2	2	2	0.0001	0.143	KELEEDDDDDDDDEMAS	K	-	0.95	4.08	0.553	0	1	0	0	2	2001.69
Replete	jgi|Auran1|55034	28628.7	0.998	2	2	2	0.0001	0.143	VATVSAHAGVAQAGLAADGR	R	Q	0.95	3.02	0.41	0	1	0	0	2	1821.96
Replete	jgi|Auran1|25795	50421.5	1	4	4	4	0.0002	0.116	AGIAAHAEQLVNK	R	V	0.95	3.64	0.484	0	1	0	0	2	1321.72
Replete	jgi|Auran1|25795	50421.5	1	4	4	4	0.0002	0.116	ALAEGEGDGIAK	K	V	0.95	3.49	0.496	0	1	0	0	2	1130.57
Replete	jgi|Auran1|25795	50421.5	1	4	4	4	0.0002	0.116	GFVQVDETMR	R	V	0.95	1.84	0.262	0	1	0	0	2	1181.56
Replete	jgi|Auran1|25795	50421.5	1	4	4	4	0.0002	0.116	SQGLSCAVLSGGDVGGTCVNR	R	G	0.95	6.24	0.568	0	1	0	0	2	2093.97
Replete	jgi|Auran1|71789	98004	1	3	3	4	0.0002	0.0538	AIELLDNDQSGLDPDELSEAK	K	L	0.95	6.45	0.66	0	2	0	0	2	2272.08
Replete	jgi|Auran1|71789	98004	1	3	3	4	0.0002	0.0538	ALTGVNVGLPETNLHEK	K	A	0.95	3.27	0.574	0	1	0	0	2	1791.96
Replete	jgi|Auran1|71789	98004	1	3	3	4	0.0002	0.0538	VSSEFFNTAGR	K	S	0.95	3.26	0.414	0	1	0	0	2	1214.58
Replete	jgi|Auran1|53834	32152.6	0.998	2	2	2	0.0001	0.139	ITTELIEIISGAAALE	R	-	0.95	3.4	0.27	0	1	0	0	2	1643.91
Replete	jgi|Auran1|53834	32152.6	0.998	2	2	2	0.0001	0.139	SIEPFVYEGDDVTLTNYDAEDTVLK	K	G	0.95	5.06	0.563	0	0	1	0	2	2833.33
Replete	jgi|Auran1|30727	22074.3	1	4	6	14	0.0005	0.236	KYEPGSPPYLALQQTLDQANNR	K	F	0.95	4.67	0.521	0	0	5	0	2	2503.26
Replete	jgi|Auran1|30727	22074.3	1	4	6	14	0.0005	0.236	QPGPIQYAQLEDCATSK	K	N	0.95	3.75	0.702	0	2	1	0	2	1905.9
Replete	jgi|Auran1|30727	22074.3	1	4	6	14	0.0005	0.236	YADSDLLCGK	R	D	0.95	3.3	0.616	0	2	0	0	2	1141.52
Replete	jgi|Auran1|30727	22074.3	1	4	6	14	0.0005	0.236	YEPGSPPYLALQQTLDQANNR	K	F	0.95	4.3	0.59	0	2	2	0	2	2375.16
Replete	jgi|Auran1|53803	61162.2	1	3	3	3	0.0001	0.0909	ATFPGLEVIGGNVVTR	K	L	0.95	3.78	0.447	0	1	0	0	2	1629.9
Replete	jgi|Auran1|53803	61162.2	1	3	3	3	0.0001	0.0909	LPIVNANYELVSLISR	K	T	0.95	3.93	0.646	0	1	0	0	2	1801.02
Replete	jgi|Auran1|53803	61162.2	1	3	3	3	0.0001	0.0909	QYGVPVIADGGVGNTGHIIK	R	A	0.95	2.32	0.297	0	0	1	0	2	1995.07
Replete	jgi|Auran1|59975	18172.8	1	4	4	4	0.0002	0.354	DNAEICEVKYPVQVDENISPEEFLAK	K	L	0.95	5.1	0.516	0	0	1	0	2	3036.45
Replete	jgi|Auran1|59975	18172.8	1	4	4	4	0.0002	0.354	ECEVCIANLEAIDALIDKDEK	K	T	0.95	3.46	0.52	0	0	1	0	2	2448.16
Replete	jgi|Auran1|59975	18172.8	1	4	4	4	0.0002	0.354	MCYYFEPIR	K	A	0.95	1.86	0.408	0	1	0	0	2	1278.57
Replete	jgi|Auran1|59975	18172.8	1	4	4	4	0.0002	0.354	YPVQVDENISPEEFLAK	K	L	0.95	5.43	0.588	0	1	0	0	2	1977.98
Replete	jgi|Auran1|29424	19528.2	0.998	2	2	3	0.0001	0.225	KPGDFGFDPLQIGGGDDPEMQLR	R	E	0.95	6.76	0.514	0	0	2	0	2	2505.17
Replete	jgi|Auran1|29424	19528.2	0.998	2	2	3	0.0001	0.225	LAMLAFAGIVTQAVLTGK	R	G	0.95	4.65	0.513	0	1	0	0	2	1820.04
Replete	jgi|Auran1|19173	7553	0.998	2	2	2	0.0001	0.318	EGDILCLLEWER	R	E	0.95	3.62	0.475	0	1	0	0	2	1532.74
Replete	jgi|Auran1|19173	7553	0.998	2	2	2	0.0001	0.318	VEFIDDPNR	R	S	0.95	2.55	0.302	0	1	0	0	2	1104.53
Replete	jgi|Auran1|67669	127945	1	6	7	17	0.0007	0.0857	IELLQGPNNNK	R	Q	0.95	3.54	0.392	0	4	0	0	2	1239.67	jgi|Auran1|63886,jgi|Auran1|71555
Replete	jgi|Auran1|67669	127945	1	6	7	17	0.0007	0.0857	IVNTAPVEFPMTAAVVPHSIDDK	R	M	0.95	2.41	0.416	0	0	1	0	2	2467.25	jgi|Auran1|71555
Replete	jgi|Auran1|67669	127945	1	6	7	17	0.0007	0.0857	NAPGAESTILVQGGSLR	K	T	0.95	5.05	0.0678	0	2	0	0	2	1669.89
Replete	jgi|Auran1|67669	127945	1	6	7	17	0.0007	0.0857	PLDADLELWHGPDNTPCK	R	M	0.95	3.33	0.424	0	0	1	0	1	2077.97	jgi|Auran1|63886,jgi|Auran1|71555
Replete	jgi|Auran1|67669	127945	1	6	7	17	0.0007	0.0857	TYPFDPLVNSVEVLLR	R	T	0.95	3.84	0.52	0	4	1	0	2	1862.01	jgi|Auran1|63886,jgi|Auran1|71555
Replete	jgi|Auran1|67669	127945	1	6	7	17	0.0007	0.0857	VYVENGQLRPFSAVIATPR	R	G	0.95	4.13	0.512	0	0	4	0	2	2117.15
Replete	jgi|Auran1|59935	80689.2	1	12	12	18	0.0007	0.252	ADLINNLGTIAK	K	S	0.95	2.72	0.2	0	1	0	0	2	1242.71
Replete	jgi|Auran1|59935	80689.2	1	12	12	18	0.0007	0.252	ANNTLTIVDTGIGMTK	K	A	0.95	4.08	0.57	0	2	0	0	2	1664.85
Replete	jgi|Auran1|59935	80689.2	1	12	12	18	0.0007	0.252	AVETSPFLEK	R	L	0.95	2.39	0.273	0	1	0	0	2	1120.59
Replete	jgi|Auran1|59935	80689.2	1	12	12	18	0.0007	0.252	EDMAEYLEER	K	R	0.95	2.55	0.37	0	1	0	0	2	1284.54
Replete	jgi|Auran1|59935	80689.2	1	12	12	18	0.0007	0.252	ELISNASDALDK	R	I	0.95	2.93	0.412	0	2	0	0	2	1275.64
Replete	jgi|Auran1|59935	80689.2	1	12	12	18	0.0007	0.252	GIVDSEDLPLNISR	K	E	0.95	4.71	0.491	0	2	0	0	2	1527.8
Replete	jgi|Auran1|59935	80689.2	1	12	12	18	0.0007	0.252	KPDEVTQEEYAAFYK	R	S	0.95	3.37	0.387	0	0	1	0	2	1817.86
Replete	jgi|Auran1|59935	80689.2	1	12	12	18	0.0007	0.252	NNDDEQHTWVSAAGGSFTVQPDAPEAK	K	R	0.95	4.59	0.569	0	0	1	0	2	2871.28
Replete	jgi|Auran1|59935	80689.2	1	12	12	18	0.0007	0.252	SGEEMTSLDDYIAR	K	M	0.95	4.35	0.614	0	3	0	0	2	1602.7
Replete	jgi|Auran1|59935	80689.2	1	12	12	18	0.0007	0.252	SLTNDWEDHAAVK	K	H	0.95	2.68	0.375	0	1	0	0	2	1485.7
Replete	jgi|Auran1|59935	80689.2	1	12	12	18	0.0007	0.252	TMEINPLNPIVK	K	S	0.95	3.61	0.519	0	2	0	0	2	1384.75
Replete	jgi|Auran1|59935	80689.2	1	12	12	18	0.0007	0.252	YQSLTDASVLDAEPNLEIHLIPDK	R	A	0.95	4.24	0.513	0	0	1	0	2	2681.37
Replete	jgi|Auran1|72267	104846	0.998	2	2	2	0.0001	0.0357	VFAWDPVDETWK	R	Q	0.95	3.06	0.325	0	1	0	0	2	1492.71	jgi|Auran1|68863
Replete	jgi|Auran1|72267	104846	0.998	2	2	2	0.0001	0.0357	VFAWDSVDETWVQR	R	G	0.95	3.96	0.272	0	1	0	0	2	1737.82
Replete	jgi|Auran1|72267	104846	0.998	2	2	2	0.0001	0.0357	YANICAWSFK	K	K	0.95	2.35	0.453	0	1	0	0	2	1259.59	jgi|Auran1|68429
Replete	jgi|Auran1|59911	17215.2	1	7	8	13	0.0005	0.652	FADENFTLK	K	H	0.95	2.78	0.497	0	1	0	0	2	1084.53
Replete	jgi|Auran1|59911	17215.2	1	7	8	13	0.0005	0.652	GFGYAGSSFHR	K	V	0.95	2.49	0.341	0	1	0	0	2	1185.54
Replete	jgi|Auran1|59911	17215.2	1	7	8	13	0.0005	0.652	GMEVVQAVEAVGSQQGK	K	T	0.95	6.19	0.58	0	3	2	0	2	1732.85
Replete	jgi|Auran1|59911	17215.2	1	7	8	13	0.0005	0.652	HTGAGILSMANAGPGTNGSQFFLCTVK	K	T	0.95	4.19	0.482	0	0	2	0	2	2752.32
Replete	jgi|Auran1|59911	17215.2	1	7	8	13	0.0005	0.652	HVVFGSVTK	K	G	0.95	2.03	0.39	0	1	0	0	2	973.547
Replete	jgi|Auran1|59911	17215.2	1	7	8	13	0.0005	0.652	TSKPVVIAACGQL	K	-	0.95	2.77	0.382	0	2	0	0	2	1343.74
Replete	jgi|Auran1|59911	17215.2	1	7	8	13	0.0005	0.652	VITQFMCQGGDFTNHNGTGGK	R	S	0.95	2.71	0.332	0	0	1	0	2	2285.01
Replete	jgi|Auran1|59967	26154.2	0.998	2	2	6	0.0002	0.14	GYEPGLTPPEQWDAIPLVGK	K	L	0.95	4.07	0.663	0	2	0	0	2	2167.11
Replete	jgi|Auran1|59967	26154.2	0.998	2	2	6	0.0002	0.14	LAMLGILSVLSESK	R	V	0.95	4.79	0.522	0	4	0	0	2	1476.83
Replete	jgi|Auran1|59906	25970.1	1	3	4	5	0.0002	0.181	SVTSMLSGLGLDADEK	K	T	0.95	4.88	0.43	0	2	0	0	2	1622.8
Replete	jgi|Auran1|59906	25970.1	1	3	4	5	0.0002	0.181	TPLKPGGGVVFGPK	R	P	0.95	3.27	0.498	0	1	1	0	1	1353.79
Replete	jgi|Auran1|59906	25970.1	1	3	4	5	0.0002	0.181	TVLVYDTEDDVLEK	K	S	0.95	3.67	0.575	0	1	0	0	2	1638.81
Replete	jgi|Auran1|20168	32619	1	10	11	20	0.0008	0.48	ADLEALAVK	K	L	0.95	2.6	0.159	0	1	0	0	2	929.531
Replete	jgi|Auran1|20168	32619	1	10	11	20	0.0008	0.48	GGKPGAFPSFNSPAAGDEYK	K	I	0.95	3.99	0.468	0	0	2	0	2	1996.94
Replete	jgi|Auran1|20168	32619	1	10	11	20	0.0008	0.48	GLLIEINNGR	R	L	0.95	3.27	0.395	0	1	0	0	2	1098.63
Replete	jgi|Auran1|20168	32619	1	10	11	20	0.0008	0.48	GNEYTIGWLR	R	Q	0.95	4.2	0.407	0	2	0	0	2	1208.61
Replete	jgi|Auran1|20168	32619	1	10	11	20	0.0008	0.48	IPHPVPLDLFDPAGLSK	K	N	0.95	2.42	0.482	0	2	0	0	2	1816
Replete	jgi|Auran1|20168	32619	1	10	11	20	0.0008	0.48	LAMLGLFGFLAESK	R	V	0.95	4.47	0.602	0	3	0	0	2	1512.81	jgi|Auran1|24811
Replete	jgi|Auran1|20168	32619	1	10	11	20	0.0008	0.48	LNPVVGYYDPLGLADADLWGR	K	G	0.95	5.94	0.624	0	2	2	0	2	2304.17
Replete	jgi|Auran1|20168	32619	1	10	11	20	0.0008	0.48	PGAFPSFNSPAAGDEYK	K	I	0.95	4.32	0.518	0	1	0	0	1	1754.8
Replete	jgi|Auran1|20168	32619	1	10	11	20	0.0008	0.48	SPAELWDQMPEAGK	K	W	0.95	4.15	0.53	0	3	0	0	2	1574.72
Replete	jgi|Auran1|20168	32619	1	10	11	20	0.0008	0.48	VPGSVPALSFIPAYDGDYMAPFAANFHVFN	K	-	0.95	4.57	0.483	0	0	1	0	2	3230.53
Replete	jgi|Auran1|22626	17382.2	1	5	6	10	0.0004	0.338	GDYCIQVGR	R	N	0.95	3.43	0.265	0	1	0	0	2	1067.49
Replete	jgi|Auran1|22626	17382.2	1	5	6	10	0.0004	0.338	KMLGATMPSQSEPGTIR	R	G	0.95	3.79	0.38	0	0	1	0	2	1835.9
Replete	jgi|Auran1|22626	17382.2	1	5	6	10	0.0004	0.338	MLGATMPSQSEPGTIR	K	G	0.95	5.19	0.548	0	5	0	0	2	1707.8
Replete	jgi|Auran1|22626	17382.2	1	5	6	10	0.0004	0.338	NICHGSDSVENAEK	R	E	0.95	2.84	0.232	0	1	0	0	2	1559.68
Replete	jgi|Auran1|22626	17382.2	1	5	6	10	0.0004	0.338	TYIMIKPDGVQR	R	G	0.95	2.4	0.331	0	1	1	0	2	1436.76
Replete	jgi|Auran1|38989	50420.9	0.998	2	2	2	0.0001	0.0586	FCDLVGDDAGLVAK	R	L	0.95	3.1	0.452	0	1	0	0	2	1479.72
Replete	jgi|Auran1|38989	50420.9	0.998	2	2	2	0.0001	0.0586	LGVDYVVDGATLPR	K	G	0.95	3.82	0.359	0	1	0	0	2	1474.79
Replete	jgi|Auran1|28783	15783	1	3	3	3	0.0001	0.292	DGCLNYVDENDEVLVAGFGR	R	R	0.95	5.22	0.683	0	1	0	0	2	2242.01
Replete	jgi|Auran1|28783	15783	1	3	3	3	0.0001	0.292	GHAVGDIPGVR	R	F	0.95	2.35	0.216	0	1	0	0	2	1077.58
Replete	jgi|Auran1|28783	15783	1	3	3	3	0.0001	0.292	VAGVSLLALYK	K	E	0.95	4.08	0.562	0	1	0	0	2	1133.69
Replete	jgi|Auran1|23344	32909.1	1	5	5	7	0.0003	0.257	AGGVASTGMFNGSVQR	R	M	0.95	3.59	0.451	0	1	0	0	2	1554.73
Replete	jgi|Auran1|23344	32909.1	1	5	5	7	0.0003	0.257	SGSCCVLVSEEDEDPIIVPEAQAGR	K	F	0.95	3.25	0.346	0	0	1	0	2	2717.24
Replete	jgi|Auran1|23344	32909.1	1	5	5	7	0.0003	0.257	TILYGGIFLYPADVK	R	S	0.95	3.94	0.124	0	1	0	0	2	1669.92
Replete	jgi|Auran1|23344	32909.1	1	5	5	7	0.0003	0.257	VGSVEDVLR	K	V	0.95	2.23	0.164	0	1	0	0	2	973.532
Replete	jgi|Auran1|23344	32909.1	1	5	5	7	0.0003	0.257	VLYEGFPMALLVER	R	A	0.95	3.6	0.535	0	3	0	0	2	1652.87
Replete	jgi|Auran1|28757	22309	0.998	2	2	4	0.0002	0.143	HIDFAITSPYGQGRPGR	K	V	0.95	2.58	0.391	0	0	1	0	2	1871.95
Replete	jgi|Auran1|28757	22309	0.998	2	2	4	0.0002	0.143	QVVNVPSFLVR	K	L	0.95	2.95	0.454	0	3	0	0	2	1257.73
Replete	jgi|Auran1|61510	29172.4	1	3	3	4	0.0002	0.146	IELLNAPNNPK	R	Q	0.95	2.99	0.369	0	1	0	0	2	1222.68
Replete	jgi|Auran1|61510	29172.4	1	3	3	4	0.0002	0.146	LRPIQTLIGTR	K	N	0.95	2.18	0.328	0	2	0	0	2	1267.79
Replete	jgi|Auran1|61510	29172.4	1	3	3	4	0.0002	0.146	VINLAPVEFPCNVHLNEK	R	-	0.95	2.82	0.381	0	0	1	0	2	2093.09
Replete	jgi|Auran1|38929	17473.8	1	3	3	7	0.0003	0.278	DMIIVPEMIGSIVGVYNGK	R	V	0.95	4.36	0.673	0	5	0	0	2	2035.06
Replete	jgi|Auran1|38929	17473.8	1	3	3	7	0.0003	0.278	LLDLNHEEFAK	K	L	0.95	4.1	0.405	0	1	0	0	2	1328.69
Replete	jgi|Auran1|38929	17473.8	1	3	3	7	0.0003	0.278	NCGPMDKPEPVK	K	T	0.95	2.46	0.289	0	1	0	0	2	1371.64
Replete	jgi|Auran1|54387	28085.2	0.998	2	2	2	0.0001	0.133	RGPDGVQTEQTLPDDVLDAVIAK	K	I	0.95	2.89	0.344	0	0	1	0	2	2437.26
Replete	jgi|Auran1|54387	28085.2	0.998	2	2	2	0.0001	0.133	TLLEVVDSGAK	K	N	0.95	3.18	0.421	0	1	0	0	2	1131.63
Replete	jgi|Auran1|18502	39702.9	1	4	4	5	0.0002	0.164	ANVLDVSQLWK	K	E	0.95	3.25	0.583	0	1	0	0	2	1272.7
Replete	jgi|Auran1|18502	39702.9	1	4	4	5	0.0002	0.164	ITLLPGDGIGPEITAATVK	K	A	0.95	3.43	0.575	0	1	0	0	2	1866.06
Replete	jgi|Auran1|18502	39702.9	1	4	4	5	0.0002	0.164	SCQAADSILMAAIGGPK	K	W	0.95	5.24	0.507	0	1	0	0	2	1705.83
Replete	jgi|Auran1|18502	39702.9	1	4	4	5	0.0002	0.164	VGQNNMIYSEPEIER	R	I	0.95	5.05	0.479	0	2	0	0	2	1794.83
Replete	jgi|Auran1|61597	503586	1	4	4	5	0.0002	0.0112	ANTRFAPPAPAR	R	P	0.95	1.82	0.314	0	0	1	0	1	1268.69
Replete	jgi|Auran1|61597	503586	1	4	4	5	0.0002	0.0112	LAGSGTVAPFK	K	V	0.95	2.73	0.453	0	1	0	0	2	1047.58
Replete	jgi|Auran1|61597	503586	1	4	4	5	0.0002	0.0112	VNPADASSAALTAELK	K	S	0.95	4.64	0.647	0	2	0	0	2	1557.81
Replete	jgi|Auran1|61597	503586	1	4	4	5	0.0002	0.0112	YVEPTTGVSFDK	K	L	0.95	2.46	0.235	0	1	0	0	2	1342.65
Replete	jgi|Auran1|71657	187400	1	5	5	7	0.0003	0.0373	GDFAAVLAEK	K	N	0.95	3.89	0.335	0	1	0	0	2	1020.54
Replete	jgi|Auran1|71657	187400	1	5	5	7	0.0003	0.0373	IADLKDAVEK	R	G	0.95	3.25	0.283	0	1	0	0	2	1101.62
Replete	jgi|Auran1|71657	187400	1	5	5	7	0.0003	0.0373	NAAIDTKPVDVSTGQGYSNDYDWK	K	R	0.95	6.82	0.553	0	0	1	0	2	2644.22
Replete	jgi|Auran1|71657	187400	1	5	5	7	0.0003	0.0373	NAFDLFNSGAYAQK	K	S	0.95	4.79	0.486	0	3	0	0	2	1545.73
[truncated: 10,489 more rows]
