# Supplementary material for: Proteome Changes Driven by Phosphorus Deficiency and Recovery in the Brown Tide-Forming Alga Aureococcus anophagefferens
Source: PLoS One. 2011 Dec 14;6(12):e28949. doi: 10.1371/journal.pone.0028949 (PMC3237563; doi:10.1371/journal.pone.0028949)
Supplement: Table S3 — Differentially abundant proteins. Proteins separated by cluster. Proteins listed in order of how they appear in Figure 2 from top to bottom. Fold changes were calculated by dividing the treatment (−P or P-refed) by the control. If the average spectral count in the control was zero, then it was coverted to 0.333 which represents the average spectral count if there was one count in one of the three technical replicates. This was done to avoid division by zero. If the fold change resulted in a decimal, the negative inverse was taken (e.g. 0.5 would be converted to −2). (XLSX) [file pone.0028949.s006.xlsx]

## Sheet: Sheet1
Table S3) Differentially abundant proteins. Proteins separated by cluster. Proteins listed in order of how they appear in Figure 2 from top to bottom. Fold changes were calculated by dividing the treatment (-P or P-refed) by the control. If the average spectral count in the control was zero, then it was coverted to 0.333 which represents the average spectral count if there was one count in one of…
Cluster	NCBI number	Annotation	Average Spectral Count			Fold Change
			-P	P-refed	Control	-P/control	P-refed/control
A	323448531	Oxidoreductase	15.3333	8	13.3333	1.15	-1.66667
A	242620108	Photosystem I iron-sulfur center subunit VII	5	2.33333	4.66667	1.07143	-2
A	323449723	Photosystem 1 reaction center subunit	14	9.66667	14	1	-1.44828
A	323449180	Mannosyltransferase	1.33333	0.333333	1.33333	1	-4
A	323450650	Phosphate ABC transporter permease	1.66667	0.333333	2	-1.2	-6
A	323451149	20S proteasome, A and B subunits	0.666667	0.333333	2.33333	-3.5	-7
A	323452672	Hypothetical protein	9	6.66667	13.6667	-1.51852	-2.05
A	323447987	Pyridoxal-5'-phosphate-dependent enzyme, beta subunit	4.66667	3.66667	6.66667	-1.42857	-1.81818
A	323446737	Acyl carrier protein	2	1.66667	4	-2	-2.4
A	323447299	Histone	46.3333	44.6667	53.6667	-1.15827	-1.20149
A	323455795	Hypotheical protein	1.33333	1	3	-2.25	-3
A	323447058	Hypothetical protein	1	0.333333	19	-19	-57
A	323452673	Hypothetical protein	11.3333	8	16.3333	-1.44118	-2.04167
A	323453613	Chloroplast Ribose 5-phosphate isomerase	4	2.66667	5.33333	-1.33333	-2
A	323454658	Cytochrome precurser	2.33333	0.333333	11	-4.71429	-33
A	323449776	Urease	1.33333	0.333333	2.33333	-1.75	-7
A	323455948	Mucin-associated surface protein (MASP)	0.666667	0.333333	3.33333	-5	-10
B	242620075	Cytochrome c550	8	7.66667	12	-1.5	-1.56522
B	323447679	Hypothetical	8.33333	8	11.6667	-1.4	-1.45833
B	323456455	Ribosomal protein	0.333333	0.333333	2.33333	-7	-7
B	323451614	Insulinase-like, Mitochondrial substrate carrier	0.333333	0.333333	1.33333	-4	-4
B	323450997	LMP7-like protein	0.333333	0.333333	1.33333	-4	-4
B	323451897	Nucleolar protein Nop56	0.333333	0.333333	2	-6	-6
B	323452541	Selenoprotein	0.333333	0.333333	1.33333	-4	-4
B	323446558	Ribosomal protein	0.333333	0.333333	1.33333	-4	-4
B	323449422	Luteovirus ORF6 protein	1.33333	1.33333	3.33333	-2.5	-2.5
B	323446199	Cell wall surface anchor protein	0.333333	0.333333	2	-6	-6
B	323454954	Calmodulin	0.333333	0.333333	2.66667	-8	-8
B	323447336	Cyanase	9.66667	9.66667	18	-1.86207	-1.86207
B	323452479	Selenoprotein	5.33333	5.66667	8.33333	-1.5625	-1.47059
B	323455041	Glyceraldehyde-3-phosphate dehydrogenase	61.6667	68.3333	138.333	-2.24324	-2.02439
B	242620083	photosystem I P700 chlorophyll A apoprotein A2	9	10.3333	14.6667	-1.62963	-1.41935
B	242620069	photosystem II p680 chlorophyll A apoprotein (CP-47)	29	34.6667	55.6667	-1.91954	-1.60577
B	323445392	Mucin-2 precursor	6.33333	7.33333	13.3333	-2.10526	-1.81818
B	323447968	Zn-finger, RING	8	9.33333	15.6667	-1.95833	-1.67857
B	323450079	Cysteine synthase	1.66667	2.33333	4.66667	-2.8	-2
B	323448543	Enolase (phosphopyruvate dehydratase)	6	8.66667	17	-2.83333	-1.96154
B	242620112	ATP synthase CF1 beta chain	39.6667	44	52.3333	-1.31933	-1.18939
B	323452124	Cytochrome	1	1.66667	4	-4	-2.4
B	242620086	Ribulose-1,5-bisphosphate carboxylase/oxygenase large subunit [Aureococcus anophagefferens]	64	105.333	235.667	-3.68229	-2.23734
B	323447684	Cytochrome c6	4	8.33333	17	-4.25	-2.04
B	323456364	Histone	5.33333	7	10	-1.875	-1.42857
B	323453682	Hypothetical protein	0.333333	1	4	-12	-4
B	323449583	Ribosomal protein	0.333333	1	3.33333	-10	-3.33333
B	323445193	Histone	5.33333	7.33333	10.6667	-2	-1.45455
B	242620087	Ribulose bisphosphate carboxlyase small chain	11.6667	32	50	-4.28571	-1.5625
B	323451650	Chloroplast hydroxymethylbilane synthase	4.33333	10.3333	15	-3.46154	-1.45161
B	323451867	Selenoprotein	2	4.66667	6.66667	-3.33333	-1.42857
B	323451587	Ribosomal Protein	0.333333	3	6.66667	-20	-2.22222
B	323452812	Dihydrolipoamide dehydrogenase	0.333333	1	5	-15	-5
B	323456630	Heparan Sulfate 2-0- sulfotranserase	0.333333	2.33333	4.66667	-14	-2
B	323454341	Thioredoxin domain 2	0.333333	0.666667	2.66667	-8	-4
B	323450925	Ribosomal protein	1	5.33333	8.33333	-8.33333	-1.5625
B	323448060	Ribosomal protein	1.33333	5.33333	7.66667	-5.75	-1.4375
B	323452552	Proteasome	0.333333	0.666667	2	-6	-3
B	242620051	50S ribosomal protein L14	0.333333	2	3.33333	-10	-1.66667
B	323454406	Armet super family domain	0.333333	1.66667	2.66667	-8	-1.6
B	323452815	Ribosomal protein L4/L1e	1.33333	8.33333	12.6667	-9.5	-1.52
B	323451167	Ribosomal porotein	0.333333	1.33333	4.33333	-13	-3.25
B	323452189	PT-repeat	8.33333	15.3333	17.3333	-2.08	-1.13043
B	323449769	Ribosomal protein	3	7	8.33333	-2.77778	-1.19048
B	323449160	Proteasome	0.333333	1.66667	5	-15	-3
B	323445273	Proteasome	0.333333	0.666667	1.66667	-5	-2.5
B	323457195	Ribosomal Protein	0.333333	0.666667	1.66667	-5	-2.5
B	323451216	Ribosomal protein	0.333333	0.666667	1.66667	-5	-2.5
B	323456180	Ribosomal protein L5	2.33333	6.33333	14	-6	-2.21053
B	242620082	photosystem I P700 chlorophyll A apoprotein A1	10.3333	14	17.6667	-1.70968	-1.2619
B	323451387	20S proteasome, A and B subunits	0.333333	1.33333	3.33333	-10	-2.5
B	323457240	Ammonium transporter	1	2.33333	4	-4	-1.71429
B	323453642	O-acetylhomoserine/O-acetylserine sulfhydrylase	5	9	12.6667	-2.53333	-1.40741
B	323456600	Ribosomal protein L30, L7, Peptidase	4	7.33333	10.3333	-2.58333	-1.40909
B	323447579	Ribosomal protein	1	2.66667	4.66667	-4.66667	-1.75
B	323448448	Nonphototropic hypocotyl	0.333333	0.333333	2.33333	-7	-7
B	242620055	50S ribosomal protein L6	0.333333	0.333333	2.33333	-7	-7
B	323450867	Acetamidase/Formamidase	2	4	5.66667	-2.83333	-1.41667
C	323453007	Initiation factor	2.33333	7	3.33333	-1.42857	2.1
C	242620067	elongation factor Tu	13	25.6667	15	-1.15385	1.71111
C	323451553	Glutamine synthetase	14.6667	30.6667	13.3333	1.1	2.3
C	323454637	Chaperonin ATPase	19	34.3333	19.6667	-1.03509	1.74576
C	323455818	Ras small GTPase	0.333333	1.33333	0.333333	1	4
C	323454310	Adenosine kinase	0.333333	2.66667	0.333333	1	8
C	323454894	Formylglycineamide ribotide amidotransferase	0.333333	2.66667	0.333333	1	8
C	323454033	Triosephosphate isomerase	1.33333	5.66667	1.33333	1	4.25
C	323452581	Chaperonin	0.333333	1.66667	0.333333	1	5
C	323451541	Ras small GTPase	0.333333	1.66667	0.333333	1	5
D	323451419	Citrate synthase	3.33333	10.6667	7.33333	0.454545	1.45455
D	323447741	Nonaspanin	0.333333	2.33333	0.333333	1	7
D	242620028	30S ribosomal protein S2	0.333333	2.66667	0.333333	1	8
D	323451948	Ribosomal protein	3	8.66667	5.66667	-1.88889	1.52941
D	323453433	Nitrate reducatase	0.333333	4	0.333333	1	12
D	323448256	Nitrate transporter	0.333333	9	1.33333	-4	6.75
D	323454388	Splicing factor	0.333333	3.33333	1	-3	3.33333
D	323453622	Phosphoserine aminotransferase	3	8.66667	6.66667	-2.22222	1.3
D	323451767	Hydroxyisobutyrate dehydrogenase	0.666667	3.66667	2.33333	-3.5	1.57143
D	242620053	50S ribosomal protein L5	0.333333	2.33333	1	-3	2.33333
D	323453434	Nitrite reductase	0.333333	2.33333	1	-3	2.33333
D	323457185	Adaptin	0.333333	2.33333	1	-3	2.33333
D	323449674	Peptidase	0.333333	2	1	-3	2
D	323450465	Ribosomal protein L18	1.66667	8.66667	7	-4.2	1.2381
D	323455979	ATPase	5.33333	24	17.6667	-3.3125	1.35849
D	323451117	Ribosomal protein	2	7.66667	6	-3	1.27778
D	323450214	Ribosomal protein	2	6.66667	5.33333	-2.66667	1.25
D	323448815	Ribosomal Protein	0.333333	3.33333	7	-21	-2.1
D	242620043	50S ribosomal protein L3	0.333333	3	6.33333	-19	-2.11111
D	323448850	Ribosomal protein	2	8	9.66667	-4.83333	-1.20833
D	323453856	Ribosomal protein L6E	1.66667	8	10	-6	-1.25
D	323452746	Ribosomal protein	1	5	6.33333	-6.33333	-1.26667
D	323456525	ATP synthase	9.33333	18.6667	20.6667	-2.21429	-1.10714
D	242620044	50S ribosomal protein L23	0.333333	1.66667	3.66667	-11	-2.2
D	323453262	Serine/threonine-protein kinase	0.333333	1	2	-6	-2
D	323450970	Ribosomal protein	0.333333	2	2.66667	-8	-1.33333
D	323454706	Ribonucleoprotein complex subunit	0.666667	2.66667	3.33333	-5	-1.25
D	323448873	Ribosomal protein	1.33333	7.66667	9	-6.75	-1.17391
D	323449333	Ribosomal protein	0.333333	4	5	-15	-1.25
D	323452337	Phosphate ABC transporter	0.333333	4.66667	7.66667	-23	-1.64286
D	323446694	Ribosomal protein	1	3.33333	3.66667	-3.66667	-1.1
D	323451627	Na+/H+ antiporter NhaA	0.333333	1.33333	2	-6	-1.5
D	323448266	Histone	12.6667	36.6667	41.6667	-3.28947	-1.13636
D	242620095	30S ribosomal protein S4	0.333333	3.66667	7.33333	-22	-2
D	323447782	Histone	4.33333	8.33333	9	-2.07692	-1.08
D	323450569	Ribosomal protein	0.333333	1.66667	3	-9	-1.8
D	323452089	IMP dehydrogenase/GMP reductase	0.333333	1.66667	3	-9	-1.8
D	323452301	Ribosomal protein	1.66667	5	5.66667	-3.4	-1.13333
D	242620034	ATP synthase CF1 alpha chain	18.3333	27.6667	29	-1.58182	-1.04819
D	323449640	Ribosomal protein	1	5.33333	6.33333	-6.33333	-1.1875
D	323454360	Ribosomal protein	0.333333	2.66667	3.33333	-10	-1.25
D	323449038	Peptidase	0.333333	2.66667	3.33333	-10	-1.25
D	323454189	Ribosomal protein	0.333333	1	1.66667	-5	-1.66667
D	323451135	Proteasome	0.333333	1	1.66667	-5	-1.66667
D	323448884	Proteasome	0.333333	1	1.66667	-5	-1.66667
D	323456545	Ribosomal protein	0.333333	6	6.33333	-19	-1.05556
D	323455169	Ribosomal protein	0.666667	8.66667	9.33333	-14	-1.07692
D	323453239	Proliferating cell nuclear antigen, PCNA	0.333333	2	2.33333	-7	-1.16667
D	323449899	Ribosomal protein	0.333333	1.66667	2	-6	-1.2
D	323451317	G-protein beta WD-40 repeat (Guanine nucleotide-binding protein)	1.33333	13.3333	15.6667	-11.75	-1.175
D	323452787	Ribosomal protein	0.333333	1.66667	2.33333	-7	-1.4
D	323454110	Ribosomal protein	1.33333	4.66667	5	-3.75	-1.07143
D	323451373	Ribosomal protein	0.666667	3.33333	3.66667	-5.5	-1.1
D	323457181	Ribosomal protein	0.333333	7.33333	9.66667	-29	-1.31818
D	323445949	Ribosomal protein	1	7	7.66667	-7.66667	-1.09524
D	323450083	Ribosomal protein	0.333333	1.33333	1.66667	-5	-1.25
D	323449973	Proteasome	0.333333	1.33333	1.66667	-5	-1.25
D	323454832	TPR repeat containing protein	0.333333	1.33333	1.66667	-5	-1.25
D	323449711	Heat shock protein	0.333333	2.33333	1.33333	-4	1.75
D	323455903	Ribosomal protein	0.333333	4	3	-9	1.33333
D	323450361	Triosephosphate isomerase	0.333333	2	1.33333	-4	1.5
D	323454381	Cystathione gamma lyase	0.333333	3	2	-6	1.5
D	323447119	Ribosomal protein	0.333333	7	5.33333	-16	1.3125
D	323449261	Ribosomal protein	0.333333	4	2.33333	-7	1.71429
D	323448136	Elongation factor	11.3333	23	22.3333	-1.97059	1.02985
D	323450976	Ribosomal protein	1	5	4.66667	-4.66667	1.07143
D	323455964	Ribosomal protein	1.66667	8.33333	7.66667	-4.6	1.08696
D	323452338	Helicase and restriction enzyme domain	0.333333	2.33333	1.66667	-5	1.4
D	323451781	Urea transporter	0.333333	5.33333	5	-15	1.06667
D	242620045	50S ribosomal protein L2	0.333333	3.33333	3	-9	1.11111
D	323454820	Chloroplast light harvesting protein	1	4.66667	4.66667	-4.66667	1
D	323451071	Ribosomal protein	0.333333	3.33333	3.33333	-10	1
D	323450320	Ribosomal protein	0.333333	3	3	-9	1
D	323450621	Ribosomal protein	0.333333	1.66667	1.66667	-5	1
D	323450747	Ribosomal Protein	0.333333	5.33333	5.33333	-16	1
D	242620066	30S ribosomal protein S7	0.333333	2.33333	2.33333	-7	1
D	323454039	Translation elongation factor	2.66667	6.66667	6.66667	-2.5	1
D	323447664	Protein kinase	1	3.66667	3.66667	-3.66667	1
D	323455547	Calreticulin precursor, calnexin	1	4	4	-4	1
D	323456325	Phosphatase	0.333333	2	2	-6	1
E	323447982	Peptidyl-prolyl cis-trans isomerase	0.666667	4.33333	0.333333	2	13
E	323456174	Translational activator	0.666667	3	0.333333	2	9
E	323456061	Calcium transporting ATpase	2.66667	8.33333	1.66667	1.6	5
E	323452930	ABC transporter	1.33333	7	0.666667	2	10.5
E	323453726	Chaperonin ATPase	8	15.3333	5.66667	1.41176	2.70588
E	323448756	RNA binding protein	2.66667	6.66667	1.66667	1.6	4
E	323452597	AMP-dependent synthetase and ligase	3	6	2	1.5	3
E	323456332	Heat shock protein (Hsp 70)	25	38	19.6667	1.27119	1.9322
E	323454696	Tetrahydrofolate dehydrogenase/cyclohydrolase	1	5.66667	0.333333	3	17
E	323455687	HMG1/2 (high mobility group) box, Amino acid/polyamine transporter II, Transcription elongation factor S-II, N-terminal	11	22.3333	7	1.57143	3.19048
E	323455637	RAN function family member - supported with BLASTp	1.33333	3	0.333333	4	9
E	323448025	Tubulin alpha-2 chain	3.66667	7.66667	1	3.66667	7.66667
E	323453579	Phosphoglycerate kinase	37.6667	45	27	1.39506	1.66667
E	323450901	Actin	17.6667	23	10.6667	1.65625	2.15625
E	323453684	H+-transporting two-sector ATPase	1.66667	3.33333	0.666667	2.5	5
E	323456170	Adenosylhomocysteinase	20.3333	26.3333	14.6667	1.38636	1.79545
E	323449174	Sulfolipid biosynthesis protein	8	13.3333	3.66667	2.18182	3.63636
E	242620037	Hsp70-type chaperone	15.3333	19.6667	10.6667	1.4375	1.84375
E	323450445	Co or Mg Chelatase	4	7.33333	1.66667	2.4	4.4
E	323449760	Glycine cleavage system	1	3	0.333333	3	9
E	323457021	Hypothetical	21	27	16.3333	1.28571	1.65306
E	323455001	Fructose bisphosphate aldolase	18.3333	26.6667	12	1.52778	2.22222
E	323450237	ATP synthase	26.6667	33.3333	22.3333	1.19403	1.49254
F	323448914	Malate dehydrogenase	0.666667	3	0.333333	2	9
F	323451863	Aspartate/other aminotransferase	0.666667	3	0.333333	2	9
F	323452158	Chloroplast light harvesting protein	9.33333	12.6667	4	2.33333	3.16667
F	323450616	Pyruvate carboxylase	7.66667	11.3333	2.66667	2.875	4.25
F	323453694	Glutamate synthase	1	6	0.333333	3	18
F	323454769	Nucleoside diphosphate kinase	13.6667	16.3333	8.66667	1.57692	1.88462
F	323447110	Triosephosphate isomerase	3	5.33333	0.666667	4.5	8
F	323454246	UDP-glucose 6-dehydrogenase	8.33333	14	2.33333	3.57143	6
F	323448027	Chloroplast light harvesting protein	16.6667	19	12	1.38889	1.58333
F	323456110	Pyruvate carboxylase	4.33333	6.33333	1.66667	2.6	3.8
F	323456329	Glutamate-1-semialdehyde aminotransferase	9.33333	13.3333	4	2.33333	3.33333
F	323454183	Amino transferase class-I and II	5.33333	8.66667	1.66667	3.2	5.2
F	323456125	Chloroplast light harvesting protein	25.3333	28.6667	19	1.33333	1.50877
F	323448510	S-adenosylmethionine synthetase	16.3333	22	8.33333	1.96	2.64
F	323455294	ABC transporter	4	7.33333	1	4	7.33333
F	323449032	Glyceraldehyde-3-phosphate dehydrogenase	10	12.6667	6	1.66667	2.11111
F	323451615	Methionyl / Aminoacyl-tRNA synthetase	0.666667	2	0.333333	2	6
F	323452169	Hypothetical protein	0.666667	2	0.333333	2	6
F	323451363	Phospholipid/glycerol acyltransferase	0.666667	2	0.333333	2	6
F	323450518	Rieske protein (Iron sulfur protein)	6	7.66667	2.33333	2.57143	3.28571
F	323455519	Helicase	3.66667	6	0.666667	5.5	9
F	323456379	Carbamoyl-phosphate synthase	3.33333	6.66667	0.333333	10	20
F	323450260	Inorganic pyrophosphatase	4.66667	6	2	2.33333	3
F	323454570	Hypothetical protein	0.666667	2.66667	0.333333	2	8
F	242620089	Conserved hypothetical plastid protein Ycf39	2	3.66667	0.333333	6	11
F	323455382	Dynein heavy chain, AAA ATPase	7.33333	8.66667	4.33333	1.69231	2
F	323447220	Hypothetical protein	0.666667	1.66667	0.333333	2	5
F	323450953	Epsilon1-COP	0.666667	1.66667	0.333333	2	5
F	323450958	Peptidase	2.33333	3.66667	0.333333	7	11
F	323453338	Acetyl-coenzyme A synthetase	4.66667	5.66667	2	2.33333	2.83333
F	323452318	Myosin head, motor region	3	9.33333	0.333333	9	28
F	323448097	Chloroplast light harvesting protein	2.33333	7	0.333333	7	21
F	323452847	UTP--glucose-1-phosphate uridylyltransferase	8.66667	12.6667	1	8.66667	12.6667
F	323456741	Mitochondrial substrate carrier	6	8.66667	0.666667	9	13
F	323454181	Zinc-containing alcohol dehydrogenase superfamily	1.33333	3	0.333333	4	9
F	323454770	Calreticulin/calnexin	2	2.66667	0.333333	6	8
F	323453907	Enolase (phosphopyruvate dehydratase)	10.6667	11.3333	7.33333	1.45455	1.54545
F	323454760	Inorganic phosphate transporter	19.6667	16.6667	0.333333	59	50
F	323450330	ABC transporter	7	6.33333	0.333333	21	19
F	323457264	Nicotinamide nucleotide transhydrogenase	3.66667	3.33333	0.333333	11	10
F	323450268	Flavin-containing monooxygenase-like	12.3333	10	0.333333	37	30
F	323456208	Synaptobrevin	2.33333	2	0.333333	7	6
F	323446732	Hypothetical protein	2.33333	2	0.333333	7	6
F	323452005	Chloroplast light harvesting protein	10.3333	10	4	2.58333	2.5
F	323451260	Cobalamin synthesis protein	2	1.66667	0.333333	6	5
F	323452273	Hypotheical protein	3	3	0.333333	9	9
F	323452383	Ribose-phosphate pyrophosphokinase	3.66667	3.66667	0.333333	11	11
F	323457207	Chloroplast light harvesting protein	10	10	5.33333	1.875	1.875
F	323454417	Beta-ketoacyl ACP synthase	4	4	1	4	4
F	323456109	ATPase	2	2	0.333333	6	6
F	323455642	5'-nucleotidase	6	7.66667	0.333333	18	23
F	323453090	Aconitate hydratase	12.6667	13	5.33333	2.375	2.4375
F	323449755	Amino transferase class-III	10	11.6667	0.333333	30	35
F	323450876	Pyruvate kinase	7.66667	8	1	7.66667	8
F	323451378	Sterol methyltransferase	2.33333	2.66667	0.333333	7	8
F	323452833	CAP protein	2.33333	2.66667	0.333333	7	8
F	323448862	Carbamoyl-phosphate synthase, Carboxyl transferase, Biotin carboxylase, Biotin/lipoyl attachment	10.6667	13	0.333333	32	39
F	323452848	Phosphoglucomutase	10	11.6667	0.666667	15	17.5
F	323447335	Formate/nitrite transporter	2	2.66667	0.333333	6	8
F	323452898	Glutamate dehydrogenase	3	3.33333	0.333333	9	10
F	323454682	GDP dissociation protein	2.33333	3	0.333333	7	9
F	323450582	Transketolase	2.33333	3	0.333333	7	9
F	323454473	Iron-dependent fumarate hydratase, Fe-S type hydro-lyases tartrate/fumarate	1.33333	1.66667	0.333333	4	5
F	323456351	Chloroplast light harvesting protein	1.33333	1.66667	0.333333	4	5
F	323455486	Clathrin vesicle coat	16.6667	21.3333	1	16.6667	21.3333
F	323451977	GDP-mannose 3,5-epimerase	4.33333	7.33333	0.333333	13	22
F	323453524	Glutathion transferase	2.33333	3.66667	0.333333	7	11
F	323456872	FAD linked oxidase, N-terminal	10.3333	12	2	5.16667	6
F	323456684	3-hydroxyacyl-CoA dehydrogenase	3	3.66667	0.333333	9	11
F	323448823	Adenylylsulfate kinase	1.66667	2.66667	0.333333	5	8
F	323455708	Cell division protein FtsH	3	4.66667	0.333333	9	14
F	323448789	GUN4 like domain	2.33333	2.66667	0.333333	7	8
F	323454031	Chloroplast light harvesting protein	7	7.33333	3.66667	1.90909	2
F	323450235	Ttubulin beta chain	3	5.33333	0.333333	9	16
F	323450497	Serine/threonine-protein phosphatase	1	1.66667	0.333333	3	5
F	323453325	Phosphoenolpyruvate carboxylase	5.33333	6.66667	0.666667	8	10
F	323450177	Ras small GTPase	2.66667	3.33333	0.333333	8	10
F	323449109	Low molecular weight phosphotyrosine protein phosphatase	2	3.66667	0.333333	6	11
F	323451061	Histidine kinase	1.66667	3	0.333333	5	9
F	323453590	ATPase	1.66667	3	0.333333	5	9
F	323456607	Aminotransferase	3.33333	7.33333	0.333333	10	22
F	323453164	N-ethylmaleimide sensitive fusion protein	1.66667	3.33333	0.333333	5	10
F	323450905	Endonuclease/exonuclease/phosphatase	11	8.66667	2.66667	4.125	3.25
F	323449461	Chloroplast light harvesting protein	24	21.3333	12	2	1.77778
F	323457297	Myosin	1.66667	0.666667	0.333333	5	2
F	323449672	Chloroplast light harvesting protein	4.66667	3.66667	1	4.66667	3.66667
F	323453547	Prohibitin	2	0.666667	0.333333	6	2
F	323449390	Exportin	2.33333	0.666667	0.333333	7	2
F	323452472	Chloroplast light harvesting protein	10.3333	8.33333	4	2.58333	2.08333
F	323451357	Rab family GTPase	2	1.33333	0.333333	6	4
F	323449750	Chloroplast light harvesting protein	8.33333	7.33333	4.66667	1.78571	1.57143
F	323454677	IspG protein, diphosphate synthetase	4.33333	3.66667	1	4.33333	3.66667
F	323456737	Inorganic phosphate transporter	2.33333	1.33333	0.333333	7	4
F	323450398	Plastidic triose-phosphate/phosphate translocator	1.66667	1	0.333333	5	3
F	323457284	Mucin-associated surface protein	8.66667	8	4.66667	1.85714	1.71429
F	323457115	Chloroplast precursor CbxX/CfqX	7.66667	6.66667	1.66667	4.6	4
F	323455682	Phosphoglucose isomerase	3.66667	3	0.333333	11	9
F	323456836	Hypothetical protein	5.33333	4.33333	0.333333	16	13
F	323454315	Chloroplast light harvesting protein	4.33333	4	1.33333	3.25	3
F	323455675	Chloroplast light harvesting protein	4	3.66667	1	4	3.66667
F	323457045	Cobalmin synthesis protein/P47K like	4.66667	4.33333	1.33333	3.5	3.25
F	323455983	Flavin containing monooxygenase 5	1.33333	1	0.333333	4	3
F	323454125	ABC transporter	1.33333	1	0.333333	4	3
F	323454580	Glutathione peroxidase	1.33333	1	0.333333	4	3
G	323453409	Diaminopimelate epimerase	4.66667	1.66667	1	4.66667	1.66667
G	323448492	Chloroplast photosystem II 12 kDa extrinsic protein	8.66667	3	2	4.33333	1.5
G	323455645	Hypothetical protein, no significant BLAST	5.66667	3	2.33333	2.42857	1.28571
G	323453799	Pyruvate kinase	6.66667	1.66667	0.333333	20	5
G	323450333	Isocitrate dehydrogenase NADP-dependent	7	3	1.33333	5.25	2.25
G	323454939	Chloroplast light harvesting protein	14.6667	11.6667	9.33333	1.57143	1.25
G	323449474	Semialdehyde dehydrogenase	3.33333	1.66667	1	3.33333	1.66667
G	323455998	Alkaline phosphatase	4.33333	0.666667	0.333333	13	2
G	323452393	OmpA/MotB domain-containing protein	3.33333	1.66667	0.333333	10	5
G	323456271	Chloroplast light harvesting protein	10	7.66667	4	2.5	1.91667
G	323453816	Chloroplast light harvesting protein	7.66667	6.33333	4	1.91667	1.58333
G	323448051	Chloroplast light harvesting protein	13	11.3333	8	1.625	1.41667
G	323451463	SecA-type chloroplast protein transport factor	1.33333	0.333333	0.333333	4	1
G	323448259	Mitochondrial carrier protein	1.33333	0.333333	0.333333	4	1
G	323449871	HMG-CoA lyase-like, Alpha-isopropylmalate/homocitrate synthase	2	0.333333	0.333333	6	1
G	323455015	Cycloartenol-C24-methyltransferase	2.33333	0.333333	0.333333	7	1
G	242620040	Photosystem II 44 kDa apoprotein (P6)	18.3333	16.3333	13.3333	1.375	1.225
G	323452748	TB2/DP1/HVA22 related protein	3	2	1	3	2
G	242620099	Cytochrome b6	5	3.66667	2.33333	2.14286	1.57143
H	323452454	Xanthine dehydrogenase	11	4.66667	5.66667	1.94118	-1.21429
H	323454481	Sulfate adenylyltransferase	13	6	5.66667	2.29412	1.05882
H	323452026	Alcohol dehydrogenase	1.66667	0.333333	0.333333	5	1
H	323451404	Tyrosinase, Phytanoyl-CoA dioxygenase	4.66667	2	2	2.33333	1
H	323450718	Photosystem II stability/assembly factor	2.33333	0.333333	0.333333	7	1
H	323451030	DEAD/DEAH box helicase domain-containing protein	1.33333	0.333333	0.333333	4	1
H	323449787	Hedgehog protein	1.33333	0.333333	0.333333	4	1
